# Supplementary material for: Identification of colorectal cancer associated biomarkers: an integrated analysis of miRNA expression
Source: publisher site journal article supplement (doi:10.18632/aging.203556), 2021-09-21
Supplement: Supplementary file [file aging-v13i18-203556-supplementary-material-SD7.pdf]

**SUPPLEMENTARY TABLES**

**Supplementary Table 6. Area under the ROC curves (AUC) for the 25 downregulated miRNAs according to each dataset.**

| <b>MiRNA name</b> | <b>TCGA</b> | <b>GSE30454</b> | <b>GSE33125</b> | <b>GSE18392</b> |
|-------------------|-------------|-----------------|-----------------|-----------------|
| hsa-miR-125a-5p   | 0.998       | 0.795           | 1.000           | 0.942           |
| hsa-miR-127-3p    | 0.880       | 0.839           |                 | 0.794           |
| hsa-miR-129-5p    | 0.904       | 0.792           |                 | 0.801           |
| hsa-miR-133b      | 0.999       | 0.975           |                 | 0.750           |
| hsa-miR-139-5p    | 0.965       | 0.944           | 0.944           | 0.993           |
| hsa-miR-193a-5p   | 1.000       | 0.793           | 0.986           |                 |
| hsa-miR-28-3p     | 1.000       | 0.753           | 0.905           |                 |
| hsa-miR-296-5p    | 0.875       | 0.859           |                 | 0.882           |
| hsa-miR-299-5p    | 1.000       | 0.842           |                 | 0.764           |
| hsa-miR-320a      | 1.000       |                 | 0.864           | 0.929           |
| hsa-miR-320b      | 1.000       |                 | 0.864           | 0.929           |
| hsa-miR-320d      | 0.695       |                 | 0.864           | 0.929           |
| hsa-miR-324-3p    | 1.000       | 0.739           |                 | 0.940           |
| hsa-miR-324-5p    | 0.934       | 0.754           |                 | 0.841           |
| hsa-miR-326       | 1.000       | 0.819           |                 | 0.986           |
| hsa-miR-330-3p    | 0.890       |                 | 0.903           | 0.885           |
| hsa-miR-331-3p    | 0.941       | 0.855           |                 | 0.696           |
| hsa-miR-339-5p    | 1.000       | 0.741           |                 | 0.621           |
| hsa-miR-342-3p    | 0.853       | 0.843           | 0.875           | 0.945           |
| hsa-miR-375       | 0.917       |                 | 0.972           | 0.970           |
| hsa-miR-423-3p    | 0.990       | 0.677           |                 | 0.849           |
| hsa-miR-484       | 0.995       | 0.681           | 0.889           | 0.968           |
| hsa-miR-486-5p    | 1.000       | 0.680           | 0.952           | 0.875           |
| hsa-miR-490-3p    | 0.912       | 0.970           |                 | 0.690           |
| hsa-miR-574-3p    | 1.000       | 0.848           |                 | 0.950           |

**Supplementary Table 7. Stage II overall survival (OS) results for the panels of miRNAs containing combinations of 2, 3, 4 and 5 simultaneous miRNAs from the 25 selected miRNAs.**

| <b>Stage 2 overall survival (OS) analysis</b>     |                |                                                             |                                                            |                     |
|---------------------------------------------------|----------------|-------------------------------------------------------------|------------------------------------------------------------|---------------------|
| <b>Combinations 2 by 2</b>                        |                |                                                             |                                                            |                     |
| <b>miRNA combinations</b>                         | <b>p-value</b> | <b>Number of individuals in the Higher expression group</b> | <b>Number of individuals in the Lower expression group</b> | <b>Hazard ratio</b> |
| hsa-miR-342-3p - hsa-miR-331-3p                   | 0.000183       | 25                                                          | 29                                                         | 4.15E-10            |
| hsa-miR-342-3p - hsa-miR-574-3p                   | 0.0045         | 25                                                          | 26                                                         | 2.97E-10            |
| hsa-miR-342-3p - hsa-miR-326                      | 0.007241       | 26                                                          | 29                                                         | 0.132538444         |
| hsa-miR-127-3p - hsa-miR-331-3p                   | 0.020103       | 28                                                          | 29                                                         | 0.124275996         |
| hsa-miR-127-3p - hsa-miR-342-3p                   | 0.026718       | 26                                                          | 27                                                         | 0.187519247         |
| hsa-miR-342-3p - hsa-miR-324-5p                   | 0.040052       | 30                                                          | 34                                                         | 0.257492788         |
| <b>Combinations 3 by 3</b>                        |                |                                                             |                                                            |                     |
| <b>miRNA combinations</b>                         | <b>p-value</b> | <b>Number of individuals in the Higher expression group</b> | <b>Number of individuals in the Lower expression group</b> | <b>Hazard ratio</b> |
| hsa-miR-342-3p - hsa-miR-331-3p - hsa-miR-324-5p  | 0.000371       | 18                                                          | 23                                                         | 1.91E-10            |
| hsa-miR-342-3p - hsa-miR-331-3p - hsa-miR-484     | 0.000644       | 17                                                          | 23                                                         | 2.50E-10            |
| hsa-miR-342-3p - hsa-miR-331-3p - hsa-miR-320b    | 0.000797       | 16                                                          | 19                                                         | 1.67E-10            |
| hsa-miR-342-3p - hsa-miR-331-3p - hsa-miR-324-3p  | 0.002392       | 19                                                          | 20                                                         | 1.63E-10            |
| hsa-miR-342-3p - hsa-miR-326 - hsa-miR-331-3p     | 0.00311        | 19                                                          | 17                                                         | 2.73E-10            |
| hsa-miR-342-3p - hsa-miR-331-3p - hsa-miR-339-5p  | 0.0036         | 15                                                          | 18                                                         | 2.02E-10            |
| hsa-miR-320a - hsa-miR-342-3p - hsa-miR-331-3p    | 0.004512       | 16                                                          | 17                                                         | 2.03E-10            |
| hsa-miR-330-3p - hsa-miR-342-3p - hsa-miR-331-3p  | 0.004909       | 17                                                          | 16                                                         | 2.08E-10            |
| hsa-miR-342-3p - hsa-miR-326 - hsa-miR-324-5p     | 0.006234       | 14                                                          | 19                                                         | 0.082704817         |
| hsa-miR-127-3p - hsa-miR-331-3p - hsa-miR-320b    | 0.007548       | 15                                                          | 18                                                         | 5.07E-10            |
| hsa-miR-342-3p - hsa-miR-331-3p - hsa-miR-574-3p  | 0.00761        | 14                                                          | 19                                                         | 1.53E-10            |
| hsa-miR-342-3p - hsa-miR-331-3p - hsa-miR-193a-5p | 0.008237       | 14                                                          | 17                                                         | 1.63E-10            |
| hsa-miR-127-3p - hsa-miR-331-3p - hsa-miR-320d    | 0.008371       | 16                                                          | 14                                                         | 6.19E-10            |
| hsa-miR-127-3p - hsa-miR-326 - hsa-miR-320b       | 0.008834       | 15                                                          | 17                                                         | 3.02E-10            |
| hsa-miR-342-3p - hsa-miR-331-3p - hsa-miR-28-3p   | 0.009528       | 13                                                          | 17                                                         | 1.79E-10            |
| hsa-miR-342-3p - hsa-miR-331-3p - hsa-miR-423-3p  | 0.010063       | 16                                                          | 19                                                         | 1.83E-10            |
| hsa-miR-342-3p - hsa-miR-484 - hsa-miR-574-3p     | 0.011389       | 14                                                          | 18                                                         | 2.04E-10            |
| hsa-miR-342-3p - hsa-miR-324-3p - hsa-miR-486-5p  | 0.012555       | 17                                                          | 15                                                         | 2.17E-10            |
| hsa-miR-342-3p - hsa-miR-324-5p - hsa-miR-574-3p  | 0.012883       | 17                                                          | 21                                                         | 3.52E-10            |
| hsa-miR-331-3p - hsa-miR-299-5p - hsa-miR-320d    | 0.015158       | 14                                                          | 18                                                         | 5.15E-10            |
| hsa-miR-127-3p - hsa-miR-320a - hsa-miR-331-3p    | 0.015451       | 16                                                          | 17                                                         | 5.20E-10            |
| hsa-miR-125a-5p - hsa-miR-342-3p - hsa-miR-574-3p | 0.017208       | 17                                                          | 16                                                         | 3.72E-10            |
| hsa-miR-342-3p - hsa-miR-326 - hsa-miR-320b       | 0.017705       | 17                                                          | 17                                                         | 0.104040078         |
| hsa-miR-127-3p - hsa-miR-574-3p - hsa-miR-320b    | 0.019981       | 16                                                          | 19                                                         | 4.28E-10            |
| hsa-miR-342-3p - hsa-miR-574-3p - hsa-miR-320b    | 0.021539       | 13                                                          | 18                                                         | 1.16E-10            |
| hsa-miR-125a-5p - hsa-miR-342-3p - hsa-miR-331-3p | 0.02189        | 14                                                          | 17                                                         | 1.18E-10            |
| hsa-miR-129-5p - hsa-miR-133b - hsa-miR-574-3p    | 0.025347       | 15                                                          | 15                                                         | 2.74E-10            |
| hsa-miR-326 - hsa-miR-574-3p - hsa-miR-320b       | 0.027324       | 19                                                          | 22                                                         | 0.166390667         |
| hsa-miR-342-3p - hsa-miR-484 - hsa-miR-28-3p      | 0.027724       | 15                                                          | 19                                                         | 0.114500372         |
| hsa-miR-342-3p - hsa-miR-339-5p - hsa-miR-574-3p  | 0.02844        | 17                                                          | 17                                                         | 3.33E-10            |
| hsa-miR-342-3p - hsa-miR-324-3p - hsa-miR-484     | 0.029009       | 20                                                          | 21                                                         | 0.116029538         |
| hsa-miR-342-3p - hsa-miR-324-5p - hsa-miR-324-3p  | 0.029462       | 20                                                          | 24                                                         | 0.129069723         |
| hsa-miR-342-3p - hsa-miR-331-3p - hsa-miR-486-5p  | 0.029685       | 16                                                          | 15                                                         | 1.41E-10            |
| hsa-miR-331-3p - hsa-miR-299-5p - hsa-miR-320b    | 0.030283       | 18                                                          | 21                                                         | 6.25E-10            |
| hsa-miR-326 - hsa-miR-331-3p - hsa-miR-320b       | 0.03173        | 23                                                          | 28                                                         | 0.278381887         |
| hsa-miR-342-3p - hsa-miR-324-3p - hsa-miR-320b    | 0.033438       | 17                                                          | 22                                                         | 0.129436651         |
| hsa-miR-127-3p - hsa-miR-331-3p - hsa-miR-486-5p  | 0.033689       | 16                                                          | 16                                                         | 0.132743995         |
| hsa-miR-342-3p - hsa-miR-326 - hsa-miR-193a-5p    | 0.034183       | 17                                                          | 19                                                         | 0.126647253         |
| hsa-miR-127-3p - hsa-miR-342-3p - hsa-miR-299-5p  | 0.034542       | 19                                                          | 22                                                         | 0.141023701         |
| hsa-miR-331-3p - hsa-miR-484 - hsa-miR-299-5p     | 0.036181       | 23                                                          | 20                                                         | 6.93E-10            |
| hsa-miR-296-5p - hsa-miR-423-3p - hsa-miR-484     | 0.036411       | 16                                                          | 16                                                         | 1791989256          |
| hsa-miR-342-3p - hsa-miR-326 - hsa-miR-324-3p     | 0.03694        | 17                                                          | 18                                                         | 0.12921111          |
| hsa-miR-127-3p - hsa-miR-320a - hsa-miR-324-5p    | 0.037925       | 16                                                          | 19                                                         | 5.73E-10            |
| hsa-miR-127-3p - hsa-miR-574-3p - hsa-miR-193a-5p | 0.038784       | 19                                                          | 22                                                         | 6.70E-10            |
| hsa-miR-299-5p - hsa-miR-574-3p - hsa-miR-193a-5p | 0.039263       | 22                                                          | 22                                                         | 7.03E-10            |
| hsa-miR-127-3p - hsa-miR-331-3p - hsa-miR-484     | 0.042952       | 18                                                          | 18                                                         | 7.30E-10            |
| hsa-miR-127-3p - hsa-miR-324-5p - hsa-miR-320b    | 0.042952       | 17                                                          | 18                                                         | 7.30E-10            |
| hsa-miR-127-3p - hsa-miR-331-3p - hsa-miR-324-5p  | 0.042963       | 18                                                          | 19                                                         | 0.150536555         |
| hsa-miR-127-3p - hsa-miR-330-3p - hsa-miR-331-3p  | 0.045563       | 13                                                          | 18                                                         | 0.142419981         |
| hsa-miR-127-3p - hsa-miR-326 - hsa-miR-193a-5p    | 0.045818       | 23                                                          | 23                                                         | 6.06E-10            |

|                                                  |          |    |    |             |
|--------------------------------------------------|----------|----|----|-------------|
| hsa-miR-139-5p - hsa-miR-342-3p - hsa-miR-574-3p | 0.047428 | 20 | 18 | 1.20E-09    |
| hsa-miR-299-5p - hsa-miR-574-3p - hsa-miR-320b   | 0.04939  | 20 | 21 | 4.59E-10    |
| hsa-miR-330-3p - hsa-miR-342-3p - hsa-miR-326    | 0.049694 | 22 | 21 | 0.2024995   |
| hsa-miR-127-3p - hsa-miR-324-5p - hsa-miR-486-5p | 0.049795 | 15 | 16 | 0.142344939 |

**Combinations 4 by 4**

| miRNA combinations                                                 | p-value  | Number of individuals in the |                        | Hazard ratio |
|--------------------------------------------------------------------|----------|------------------------------|------------------------|--------------|
|                                                                    |          | Higher expression group      | Lower expression group |              |
| hsa-miR-342-3p - hsa-miR-331-3p - hsa-miR-324-5p - hsa-miR-320b    | 0.000535 | 12                           | 18                     | 1.50E-10     |
| hsa-miR-342-3p - hsa-miR-331-3p - hsa-miR-324-5p - hsa-miR-484     | 0.001118 | 13                           | 20                     | 1.19E-10     |
| hsa-miR-342-3p - hsa-miR-331-3p - hsa-miR-484 - hsa-miR-320b       | 0.001827 | 12                           | 18                     | 7.11E-11     |
| hsa-miR-342-3p - hsa-miR-331-3p - hsa-miR-324-5p - hsa-miR-324-3p  | 0.00253  | 13                           | 17                     | 1.68E-10     |
| hsa-miR-342-3p - hsa-miR-331-3p - hsa-miR-324-3p - hsa-miR-484     | 0.004245 | 14                           | 16                     | 1.14E-10     |
| hsa-miR-320a - hsa-miR-342-3p - hsa-miR-331-3p - hsa-miR-484       | 0.005893 | 13                           | 17                     | 1.33E-10     |
| hsa-miR-326 - hsa-miR-331-3p - hsa-miR-324-5p - hsa-miR-320b       | 0.021147 | 18                           | 22                     | 0.2287878    |
| hsa-miR-326 - hsa-miR-331-3p - hsa-miR-574-3p - hsa-miR-320b       | 0.021749 | 14                           | 19                     | 0.161899927  |
| hsa-miR-326 - hsa-miR-324-5p - hsa-miR-574-3p - hsa-miR-320b       | 0.023646 | 13                           | 19                     | 0.164324     |
| hsa-miR-342-3p - hsa-miR-324-5p - hsa-miR-324-3p - hsa-miR-484     | 0.026451 | 16                           | 20                     | 0.113930394  |
| hsa-miR-331-3p - hsa-miR-324-5p - hsa-miR-299-5p - hsa-miR-320b    | 0.028684 | 13                           | 17                     | 5.04E-10     |
| hsa-miR-326 - hsa-miR-331-3p - hsa-miR-339-5p - hsa-miR-320b       | 0.029346 | 15                           | 18                     | 0.188073968  |
| hsa-miR-127-3p - hsa-miR-299-5p - hsa-miR-193a-5p - hsa-miR-320b   | 0.031653 | 12                           | 18                     | 0.128504824  |
| hsa-miR-127-3p - hsa-miR-324-5p - hsa-miR-484 - hsa-miR-299-5p     | 0.035638 | 16                           | 17                     | 7.99E-10     |
| hsa-miR-331-3p - hsa-miR-299-5p - hsa-miR-193a-5p - hsa-miR-320b   | 0.035737 | 14                           | 17                     | 5.35E-10     |
| hsa-miR-331-3p - hsa-miR-324-5p - hsa-miR-484 - hsa-miR-299-5p     | 0.035855 | 17                           | 16                     | 6.87E-10     |
| hsa-miR-326 - hsa-miR-331-3p - hsa-miR-320b - hsa-miR-320d         | 0.03676  | 14                           | 21                     | 0.257376989  |
| hsa-miR-127-3p - hsa-miR-330-3p - hsa-miR-299-5p - hsa-miR-193a-5p | 0.037357 | 16                           | 16                     | 5.67E-10     |
| hsa-miR-127-3p - hsa-miR-324-5p - hsa-miR-299-5p - hsa-miR-193a-5p | 0.040035 | 15                           | 18                     | 7.07E-10     |
| hsa-miR-127-3p - hsa-miR-299-5p - hsa-miR-574-3p - hsa-miR-320b    | 0.040135 | 15                           | 17                     | 4.06E-10     |
| hsa-miR-331-3p - hsa-miR-484 - hsa-miR-299-5p - hsa-miR-320b       | 0.040575 | 15                           | 15                     | 5.89E-10     |
| hsa-miR-127-3p - hsa-miR-326 - hsa-miR-299-5p - hsa-miR-193a-5p    | 0.040887 | 19                           | 20                     | 5.82E-10     |
| hsa-miR-127-3p - hsa-miR-331-3p - hsa-miR-484 - hsa-miR-299-5p     | 0.04118  | 17                           | 16                     | 7.16E-10     |
| hsa-miR-342-3p - hsa-miR-324-5p - hsa-miR-324-3p - hsa-miR-320b    | 0.041366 | 13                           | 20                     | 0.139955123  |
| hsa-miR-127-3p - hsa-miR-299-5p - hsa-miR-574-3p - hsa-miR-193a-5p | 0.043999 | 18                           | 19                     | 7.11E-10     |
| hsa-miR-125a-5p - hsa-miR-324-5p - hsa-miR-574-3p - hsa-miR-320b   | 0.047546 | 13                           | 18                     | 0.198082863  |
| hsa-miR-331-3p - hsa-miR-484 - hsa-miR-299-5p - hsa-miR-574-3p     | 0.048803 | 17                           | 16                     | 6.34E-10     |

**Combinations 5 by 5**

| miRNA combinations                                                 | p-value  | Number of individuals in the |                        | Hazard ratio |
|--------------------------------------------------------------------|----------|------------------------------|------------------------|--------------|
|                                                                    |          | Higher expression group      | Lower expression group |              |
| hsa-miR-326-hsa-miR-331-3p-hsa-miR-339-5p-hsa-miR-484-hsa-miR-320b | 0.031802 | 14                           | 16                     | 0.191311093  |

**Supplementary Table 8. Stage II recurrence-free survival (RFS) results for the panels of miRNAs containing combinations of 2, 3, 4 and 5 simultaneous miRNAs from the 25 selected miRNAs.**

| Stage 2 recurrence-free survival (RFS) analysis                               |             |                                                      |                                                     |              |
|-------------------------------------------------------------------------------|-------------|------------------------------------------------------|-----------------------------------------------------|--------------|
| Combinations 2 by 2                                                           |             |                                                      |                                                     |              |
| miRNA combinations                                                            | p-value     | Number of individuals in the Higher expression group | Number of individuals in the Lower expression group | Hazard ratio |
| hsa-miR-129-5p - hsa-miR-423-3p                                               | 0.012472997 | 20                                                   | 23                                                  | 9.843039717  |
| hsa-miR-129-5p - hsa-miR-486-5p                                               | 0.03761568  | 17                                                   | 20                                                  | 1223790672   |
| hsa-miR-331-3p - hsa-miR-320d                                                 | 0.039159223 | 28                                                   | 30                                                  | 0.331858185  |
| Combinations 3 by 3                                                           |             |                                                      |                                                     |              |
| miRNA combinations                                                            | p-value     | Number of individuals in the Higher expression group | Number of individuals in the Lower expression group | Hazard ratio |
| hsa-miR-129-5p - hsa-miR-324-3p - hsa-miR-423-3p                              | 0.012135384 | 16                                                   | 14                                                  | 2891271744   |
| hsa-miR-129-5p - hsa-miR-324-5p - hsa-miR-423-3p                              | 0.018478048 | 16                                                   | 14                                                  | 3747635084   |
| hsa-miR-423-3p - hsa-miR-484 - hsa-miR-299-5p                                 | 0.042449644 | 17                                                   | 17                                                  | 4.611534615  |
| Combinations 4 by 4                                                           |             |                                                      |                                                     |              |
| miRNA combinations                                                            | p-value     | Number of individuals in the Higher expression group | Number of individuals in the Lower expression group | Hazard ratio |
| hsa-miR-320a - hsa-miR-324-3p - hsa-miR-423-3p - hsa-miR-484                  | 0.025165735 | 15                                                   | 25                                                  | 1495885403   |
| Combinations 5 by 5                                                           |             |                                                      |                                                     |              |
| miRNA combinations                                                            | p-value     | Number of individuals in the Higher expression group | Number of individuals in the Lower expression group | Hazard ratio |
| hsa-miR-320a - hsa-miR-324-5p - hsa-miR-324-3p - hsa-miR-423-3p - hsa-miR-484 | 0.042737763 | 13                                                   | 24                                                  | 1516837907   |
| hsa-miR-320a - hsa-miR-324-3p - hsa-miR-423-3p - hsa-miR-484 - hsa-miR-320b   | 0.049294563 | 14                                                   | 22                                                  | 1725069778   |

**Supplementary Table 9. Stage III overall survival (OS) results for the panels of miRNAs containing combinations of 2, 3, 4 and 5 simultaneous miRNAs from the 25 selected miRNAs.**

| <b>Stage 3 overall survival (OS) analysis</b>         |                |                                                             |                                                            |                     |
|-------------------------------------------------------|----------------|-------------------------------------------------------------|------------------------------------------------------------|---------------------|
| <b>Combinations 2 by 2</b>                            |                |                                                             |                                                            |                     |
| <b>miRNA combinations</b>                             | <b>p-value</b> | <b>Number of individuals in the Higher expression group</b> | <b>Number of individuals in the Lower expression group</b> | <b>Hazard ratio</b> |
| hsa-miR-133b - hsa-miR-574-3p                         | 0.012378       | 21                                                          | 23                                                         | 0.232222735         |
| hsa-miR-375 - hsa-miR-324-3p                          | 0.012638       | 29                                                          | 31                                                         | 4.407768211         |
| hsa-miR-129-5p - hsa-miR-324-3p                       | 0.014643       | 20                                                          | 20                                                         | 5.499440216         |
| hsa-miR-129-5p - hsa-miR-486-5p                       | 0.019913       | 25                                                          | 25                                                         | 5.066314309         |
| hsa-miR-133b - hsa-miR-320b                           | 0.021693       | 21                                                          | 21                                                         | 0.200765726         |
| hsa-miR-129-5p - hsa-miR-375                          | 0.021949       | 27                                                          | 29                                                         | 3.964313324         |
| hsa-miR-127-3p - hsa-miR-375                          | 0.028557       | 23                                                          | 26                                                         | 3.316305702         |
| hsa-miR-127-3p - hsa-miR-486-5p                       | 0.029109       | 27                                                          | 28                                                         | 2.967651866         |
| hsa-miR-375 - hsa-miR-486-5p                          | 0.031743       | 30                                                          | 32                                                         | 2.889364248         |
| hsa-miR-324-3p - hsa-miR-486-5p                       | 0.033261       | 30                                                          | 31                                                         | 2.924417356         |
| hsa-miR-127-3p - hsa-miR-324-3p                       | 0.034171       | 25                                                          | 26                                                         | 3.252558631         |
| hsa-miR-133b - hsa-miR-423-3p                         | 0.036065       | 16                                                          | 14                                                         | 0.141561917         |
| hsa-miR-125a-5p - hsa-miR-133b                        | 0.03707        | 29                                                          | 26                                                         | 0.343839238         |
| hsa-miR-125a-5p - hsa-miR-574-3p                      | 0.040105       | 25                                                          | 27                                                         | 0.373019785         |
| hsa-miR-125a-5p - hsa-miR-320b                        | 0.042205       | 26                                                          | 27                                                         | 0.288138938         |
| <b>Combinations 3 by 3</b>                            |                |                                                             |                                                            |                     |
| <b>miRNA combinations</b>                             | <b>p-value</b> | <b>Number of individuals in the Higher expression group</b> | <b>Number of individuals in the Lower expression group</b> | <b>Hazard ratio</b> |
| hsa-miR-127-3p - hsa-miR-324-3p - hsa-miR-484         | 0.006047       | 15                                                          | 16                                                         | 7.109617001         |
| hsa-miR-139-5p - hsa-miR-133b - hsa-miR-574-3p        | 0.00666        | 13                                                          | 19                                                         | 0.183225311         |
| hsa-miR-129-5p - hsa-miR-375 - hsa-miR-330-3p         | 0.00815        | 15                                                          | 15                                                         | 10.62715282         |
| hsa-miR-375 - hsa-miR-324-3p - hsa-miR-484            | 0.009241       | 19                                                          | 25                                                         | 9.673416356         |
| hsa-miR-375 - hsa-miR-324-3p - hsa-miR-486-5p         | 0.010604       | 18                                                          | 22                                                         | 5.785941523         |
| hsa-miR-375 - hsa-miR-324-3p - hsa-miR-299-5p         | 0.010849       | 17                                                          | 20                                                         | 9.195008842         |
| hsa-miR-375 - hsa-miR-324-5p - hsa-miR-324-3p         | 0.015211       | 18                                                          | 21                                                         | 8.538590986         |
| hsa-miR-375 - hsa-miR-326 - hsa-miR-324-3p            | 0.016561       | 19                                                          | 22                                                         | 8.384076984         |
| hsa-miR-320a - hsa-miR-375 - hsa-miR-324-3p           | 0.019791       | 15                                                          | 16                                                         | 8.828596729         |
| hsa-miR-324-5p - hsa-miR-324-3p - hsa-miR-486-5p      | 0.020048       | 23                                                          | 22                                                         | 4.372611975         |
| hsa-miR-127-3p - hsa-miR-324-3p - hsa-miR-486-5p      | 0.020823       | 17                                                          | 16                                                         | 4.108012764         |
| hsa-miR-324-3p - hsa-miR-484 - hsa-miR-486-5p         | 0.020911       | 21                                                          | 25                                                         | 4.149880583         |
| hsa-miR-324-3p - hsa-miR-484 - hsa-miR-299-5p         | 0.02108        | 20                                                          | 24                                                         | 4.256428455         |
| hsa-miR-324-3p - hsa-miR-486-5p - hsa-miR-299-5p      | 0.021618       | 17                                                          | 20                                                         | 4.987332351         |
| hsa-miR-375 - hsa-miR-326 - hsa-miR-486-5p            | 0.022499       | 23                                                          | 19                                                         | 4.086629092         |
| hsa-miR-375 - hsa-miR-331-3p - hsa-miR-484            | 0.023042       | 18                                                          | 23                                                         | 5.228028533         |
| hsa-miR-127-3p - hsa-miR-324-3p - hsa-miR-299-5p      | 0.024471       | 20                                                          | 19                                                         | 5.035989942         |
| hsa-miR-375 - hsa-miR-330-3p - hsa-miR-486-5p         | 0.025423       | 19                                                          | 17                                                         | 4.009611391         |
| hsa-miR-331-3p - hsa-miR-324-3p - hsa-miR-299-5p      | 0.026531       | 22                                                          | 26                                                         | 3.557455347         |
| hsa-miR-375 - hsa-miR-331-3p - hsa-miR-486-5p         | 0.031352       | 19                                                          | 17                                                         | 3.911348665         |
| hsa-miR-375 - hsa-miR-324-3p - hsa-miR-339-5p         | 0.031628       | 16                                                          | 18                                                         | 5.059477829         |
| hsa-miR-125a-5p - hsa-miR-574-3p - hsa-miR-320b       | 0.034116       | 14                                                          | 17                                                         | 0.255000527         |
| hsa-miR-129-5p - hsa-miR-127-3p - hsa-miR-486-5p      | 0.035293       | 13                                                          | 17                                                         | 6.802202805         |
| hsa-miR-127-3p - hsa-miR-484 - hsa-miR-486-5p         | 0.035369       | 14                                                          | 17                                                         | 3.820791631         |
| hsa-miR-324-3p - hsa-miR-486-5p - hsa-miR-28-3p       | 0.036437       | 15                                                          | 15                                                         | 4.63958342          |
| hsa-miR-375 - hsa-miR-324-3p - hsa-miR-28-3p          | 0.038203       | 16                                                          | 16                                                         | 7.255695673         |
| hsa-miR-129-5p - hsa-miR-375 - hsa-miR-486-5p         | 0.041162       | 17                                                          | 16                                                         | 4.405278216         |
| hsa-miR-331-3p - hsa-miR-486-5p - hsa-miR-299-5p      | 0.04183        | 19                                                          | 20                                                         | 3.542986862         |
| hsa-miR-127-3p - hsa-miR-324-5p - hsa-miR-324-3p      | 0.042172       | 18                                                          | 13                                                         | 5.080609763         |
| hsa-miR-129-5p - hsa-miR-375 - hsa-miR-326            | 0.042493       | 17                                                          | 18                                                         | 6.766177524         |
| hsa-miR-330-3p - hsa-miR-324-3p - hsa-miR-299-5p      | 0.046184       | 18                                                          | 21                                                         | 4.411783414         |
| <b>Combinations 4 by 4</b>                            |                |                                                             |                                                            |                     |
| <b>miRNA combinations</b>                             | <b>p-value</b> | <b>Number of individuals in the Higher expression group</b> | <b>Number of individuals in the Lower expression group</b> | <b>Hazard ratio</b> |
| hsa-miR.375-hsa-miR.324.3p-hsa-miR.484-hsa-miR.486.5p | 0.003367       | 12                                                          | 18                                                         | 1846827734          |
| hsa-miR.375-hsa-miR.324.3p-hsa-miR.484-hsa-miR.299.5p | 0.008283       | 11                                                          | 19                                                         | 1378705155          |

|                                                             |          |    |    |             |
|-------------------------------------------------------------|----------|----|----|-------------|
| hsa.miR.375-hsa.miR.331.3p-hsa.miR.324.3p-hsa.miR.484       | 0.008617 | 14 | 21 | 10.24584142 |
| hsa.miR.331.3p-hsa.miR.324.3p-hsa.miR.484-hsa.miR.299.5p    | 0.008625 | 17 | 21 | 5.463558923 |
| hsa.miR.331.3p-hsa.miR.324.3p-hsa.miR.486.5p-hsa.miR.299.5p | 0.00879  | 15 | 16 | 6.031759481 |
| hsa.miR.375-hsa.miR.326-hsa.miR.324.3p-hsa.miR.484          | 0.009778 | 13 | 18 | 1596889310  |
| hsa.miR.127.3p-hsa.miR.331.3p-hsa.miR.324.3p-hsa.miR.299.5p | 0.013565 | 15 | 16 | 5.858868629 |
| hsa.miR.331.3p-hsa.miR.484-hsa.miR.486.5p-hsa.miR.299.5p    | 0.014746 | 14 | 17 | 5.734555866 |
| hsa.miR.331.3p-hsa.miR.324.3p-hsa.miR.484-hsa.miR.486.5p    | 0.015847 | 19 | 19 | 4.546265704 |
| hsa.miR.330.3p-hsa.miR.331.3p-hsa.miR.324.3p-hsa.miR.299.5p | 0.019236 | 15 | 18 | 5.80803277  |
| hsa.miR.324.3p-hsa.miR.484-hsa.miR.299.5p-hsa.miR.320b      | 0.024586 | 14 | 16 | 5.804163282 |
| hsa.miR.375-hsa.miR.324.5p-hsa.miR.324.3p-hsa.miR.484       | 0.024595 | 14 | 17 | 1639582946  |
| hsa.miR.375-hsa.miR.324.3p-hsa.miR.339.5p-hsa.miR.484       | 0.024757 | 13 | 17 | 8.740073882 |
| hsa.miR.330.3p-hsa.miR.324.3p-hsa.miR.484-hsa.miR.299.5p    | 0.028156 | 13 | 17 | 7.652459638 |
| hsa.miR.375-hsa.miR.324.3p-hsa.miR.484-hsa.miR.320b         | 0.031191 | 13 | 17 | 7.651464677 |
| hsa.miR.375-hsa.miR.326-hsa.miR.331.3p-hsa.miR.324.3p       | 0.034775 | 13 | 18 | 7.145246862 |
| hsa.miR.330.3p-hsa.miR.331.3p-hsa.miR.484-hsa.miR.486.5p    | 0.039314 | 16 | 14 | 4.011014862 |
| hsa.miR.324.3p-hsa.miR.339.5p-hsa.miR.484-hsa.miR.299.5p    | 0.039558 | 15 | 15 | 5.098768587 |
| hsa.miR.324.5p-hsa.miR.324.3p-hsa.miR.484-hsa.miR.486.5p    | 0.041095 | 18 | 17 | 5.134269181 |

**Combinations 5 by 5**

| <b>miRNA combinations</b>                                                       | <b>p-value</b> | <b>Number of individuals in the Higher expression group</b> | <b>Number of individuals in the Lower expression group</b> | <b>Hazard ratio</b> |
|---------------------------------------------------------------------------------|----------------|-------------------------------------------------------------|------------------------------------------------------------|---------------------|
| hsa-miR-331-3p - hsa-miR-324-5p - hsa-miR-324-3p - hsa-miR-484 - hsa-miR-486-5p | 0.02038        | 17                                                          | 14                                                         | 8.81519013          |

**Supplementary Table 10. Stage III recurrence-free Survival (RFS) results for the panels of miRNAs containing combinations of 2, 3, 4 and 5 simultaneous miRNAs from the 25 selected miRNAs.**

| Stage 3 recurrence-free survival (RFS) analysis                                 |                |                                                      |                                                     |              |
|---------------------------------------------------------------------------------|----------------|------------------------------------------------------|-----------------------------------------------------|--------------|
| Combinations 2 by 2                                                             |                |                                                      |                                                     |              |
| miRNA combinations                                                              | <i>p-value</i> | Number of individuals in the Higher expression group | Number of individuals in the Lower expression group | Hazard ratio |
| hsa-miR-127-3p - hsa-miR-320d                                                   | 0.006346       | 19                                                   | 24                                                  | 1753902556   |
| hsa-miR-324-3p - hsa-miR-320d                                                   | 0.012169       | 21                                                   | 21                                                  | 5.7592911    |
| hsa-miR-342-3p - hsa-miR-320d                                                   | 0.046197       | 18                                                   | 17                                                  | 6.702539172  |
| Combinations 3 by 3                                                             |                |                                                      |                                                     |              |
| miRNA combinations                                                              | <i>p-value</i> | Number of individuals in the Higher expression group | Number of individuals in the Lower expression group | Hazard ratio |
| hsa-miR-127-3p - hsa-miR-326 - hsa-miR-320d                                     | 0.002417       | 16                                                   | 15                                                  | 2807731991   |
| hsa-miR-127-3p - hsa-miR-330-3p - hsa-miR-320d                                  | 0.002723       | 12                                                   | 19                                                  | 2489265019   |
| hsa-miR-326 - hsa-miR-299-5p - hsa-miR-320d                                     | 0.012646       | 15                                                   | 15                                                  | 3478257329   |
| hsa-miR-330-3p - hsa-miR-299-5p - hsa-miR-320d                                  | 0.013823       | 16                                                   | 16                                                  | 10.5674672   |
| hsa-miR-127-3p - hsa-miR-299-5p - hsa-miR-320d                                  | 0.016057       | 14                                                   | 16                                                  | 1933160272   |
| hsa-miR-331-3p - hsa-miR-324-3p - hsa-miR-320d                                  | 0.019325       | 17                                                   | 19                                                  | 5.644369439  |
| hsa-miR-296-5p - hsa-miR-486-5p - hsa-miR-574-3p                                | 0.026561       | 13                                                   | 17                                                  | 3.32E-10     |
| hsa-miR-125a-5p - hsa-miR-324-3p - hsa-miR-484                                  | 0.028803       | 15                                                   | 17                                                  | 2033531460   |
| hsa-miR-127-3p - hsa-miR-28-3p - hsa-miR-320d                                   | 0.029091       | 13                                                   | 18                                                  | 1571292250   |
| hsa-miR-125a-5p - hsa-miR-331-3p - hsa-miR-484                                  | 0.033347       | 14                                                   | 16                                                  | 8.256186753  |
| hsa-miR-127-3p - hsa-miR-331-3p - hsa-miR-324-3p                                | 0.035378       | 16                                                   | 18                                                  | 3.974019274  |
| hsa-miR-375 - hsa-miR-324-5p - hsa-miR-339-5p                                   | 0.041514       | 20                                                   | 20                                                  | 0.151915197  |
| hsa-miR-375 - hsa-miR-339-5p - hsa-miR-423-3p                                   | 0.043281       | 19                                                   | 22                                                  | 0.313552875  |
| hsa-miR-375 - hsa-miR-423-3p - hsa-miR-320b                                     | 0.045428       | 17                                                   | 18                                                  | 0.269099457  |
| Combinations 4 by 4                                                             |                |                                                      |                                                     |              |
| miRNA combinations                                                              | <i>p-value</i> | Number of individuals in the Higher expression group | Number of individuals in the Lower expression group | Hazard ratio |
| hsa-miR-331-3p- hsa-miR-324-3p- hsa-miR-484- hsa-miR-299-5p                     | 0.013791       | 15                                                   | 19                                                  | 10.59870794  |
| hsa-miR-331-3p- hsa-miR-324-3p- hsa-miR-339-5p- hsa-miR-484                     | 0.013997       | 16                                                   | 17                                                  | 1736443836   |
| hsa-miR-375- hsa-miR-324-5p- hsa-miR-339-5p- hsa-miR-423-3p                     | 0.016913       | 15                                                   | 16                                                  | 0.117756367  |
| hsa-miR-324-5p- hsa-miR-423-3p- hsa-miR-574-3p- hsa-miR-320b                    | 0.021091       | 17                                                   | 13                                                  | 5.59E-10     |
| hsa-miR-324-5p- hsa-miR-339-5p- hsa-miR-423-3p- hsa-miR-574-3p                  | 0.024983       | 16                                                   | 14                                                  | 4.64E-10     |
| hsa-miR-324-5p- hsa-miR-324-3p- hsa-miR-484- hsa-miR-299-5p                     | 0.027121       | 16                                                   | 16                                                  | 1244231980   |
| hsa-miR-324-5p- hsa-miR-339-5p- hsa-miR-423-3p- hsa-miR-486-5p                  | 0.028999       | 16                                                   | 17                                                  | 0.132653626  |
| hsa-miR-320a- hsa-miR-331-3p- hsa-miR-324-3p- hsa-miR-484                       | 0.037118       | 14                                                   | 16                                                  | 9.067631054  |
| hsa-miR-324-5p- hsa-miR-423-3p- hsa-miR-486-5p- hsa-miR-320b                    | 0.038805       | 15                                                   | 15                                                  | 0.139366947  |
| hsa-miR-331-3p- hsa-miR-484- hsa-miR-299-5p- hsa-miR-574-3p                     | 0.039364       | 14                                                   | 17                                                  | 1735697193   |
| Combinations 5 by 5                                                             |                |                                                      |                                                     |              |
| miRNA combinations                                                              | <i>p-value</i> | Number of individuals in the Higher expression group | Number of individuals in the Lower expression group | Hazard ratio |
| hsa-miR-331-3p - hsa-miR-324-5p - hsa-miR-324-3p - hsa-miR-484 - hsa-miR-299-5p | 0.029939       | 14                                                   | 16                                                  | 1202659728   |

**Supplementary Table 11. Area under the ROC curves (AUC) for the 25 downregulated miRNAs according to each new dataset.**

| <b>MIRNA name</b> | <b>GSE115513</b> | <b>GSE41655</b> | <b>GSE71008</b> |
|-------------------|------------------|-----------------|-----------------|
| hsa-miR-125a-5p   | 0.537            | 0.541           | 0.7017          |
| hsa-miR-127-3p    | 0.603            | 0.755           | 0.5232          |
| hsa-miR-129-5p    | 0.512            | 0.546           | 0.5568          |
| hsa-miR-133b      | 0.500            | 0.990           |                 |
| hsa-miR-139-5p    | 0.602            | 0.818           | 0.6873          |
| hsa-miR-193a-5p   | 0.498            | 0.748           | 0.5599          |
| hsa-miR-28-3p     | 0.511            | 0.499           | 0.6416          |
| hsa-miR-296-5p    | 0.516            | 0.589           |                 |
| hsa-miR-299-5p    | 0.688            | 0.567           |                 |
| hsa-miR-320a      | 0.533            | 0.688           | 0.5922          |
| hsa-miR-320b      | 0.555            | 0.891           | 0.5315          |
| hsa-miR-320d      | 0.537            | 0.546           | 0.5737          |
| hsa-miR-324-3p    | 0.563            | 0.791           | 0.5714          |
| hsa-miR-324-5p    | 0.583            | 0.796           | 0.5346          |
| hsa-miR-326       |                  | 0.539           | 0.5086          |
| hsa-miR-330-3p    | 0.665            | 0.792           | 0.5769          |
| hsa-miR-331-3p    | 0.577            | 0.560           | 0.5539          |
| hsa-miR-339-5p    | 0.787            | 0.519           | 0.5094          |
| hsa-miR-342-3p    | 0.540            | 0.884           | 0.5191          |
| hsa-miR-375       | 0.568            | 0.923           | 0.5238          |
| hsa-miR-423-3p    | 0.623            | 0.471           | 0.6176          |
| hsa-miR-484       | 0.531            | 0.835           | 0.5273          |
| hsa-miR-486-5p    | 0.737            | 0.682           | 0.4702          |
| hsa-miR-490-3p    | 0.778            | 0.422           | 0.545           |
| hsa-miR-574-3p    | 0.520            | 0.710           | 0.5996          |



**Supplementary Table 12. Stage III overall survival (OS) results for the panels of miRNAs containing combinations of 2 and 3 simultaneous miRNAs from the selected 8 miRNAs.**

| <b>Stage 3 overall survival (OS) analysis</b> |                       |                                                             |                                                            |                     |
|-----------------------------------------------|-----------------------|-------------------------------------------------------------|------------------------------------------------------------|---------------------|
| <b>Combinations 2 by 2</b>                    |                       |                                                             |                                                            |                     |
| <b>miRNA combinations</b>                     | <b><i>p-value</i></b> | <b>Number of individuals in the Higher expression group</b> | <b>Number of individuals in the Lower expression group</b> | <b>Hazard ratio</b> |
| hsa-miR-486-5p - hsa-miR-375                  | 0.031743              | 30                                                          | 32                                                         | 2.889364            |
| <b>Combinations 3 by 3</b>                    |                       |                                                             |                                                            |                     |
| <b>miRNA combinations</b>                     | <b><i>p-value</i></b> | <b>Number of individuals in the Higher expression group</b> | <b>Number of individuals in the Lower expression group</b> | <b>Hazard ratio</b> |
| hsa-miR-486-5p - hsa-miR-330-3p - hsa-miR-375 | 0.025423              | 19                                                          | 17                                                         | 4.009611            |
| hsa-miR-486-5p - hsa-miR-331-3p - hsa-miR-375 | 0.031352              | 19                                                          | 17                                                         | 3.911349            |
