# Supplementary material for: Identification of colorectal cancer associated biomarkers: an integrated analysis of miRNA expression
Source: Aging (Albany NY). 2021 Sep 21;13(18):21991–2029. doi: 10.18632/aging.203556 (PMC8507258; doi:10.18632/aging.203556)
Supplement: Supplementary Table 1 [file aging-13-203556-s002.xlsx]

## Sheet: Supplementary Table I
Supplementary Table 1. List of functional microRNA-target interactions (MTIs) experimentally validated for the 26 downregulated miRNAs retrieved from the MirTarBase dataset.
miRTarBase.ID	miRNA	miRNA species	Target Gene	Target Gene Species	Experiments	Support Type	PMID References
MIRT000053	hsa-miR-375	Homo sapiens	TIMM8A	Homo sapiens	Luciferase reporter assay	Functional MTI	19734348
MIRT000053	hsa-miR-375	Homo sapiens	TIMM8A	Homo sapiens	Immunohistochemistry//Luciferase reporter assay//Microarray//Northern blot//qRT-PCR	Functional MTI	19807270
MIRT000054	hsa-miR-375	Homo sapiens	MTPN	Homo sapiens	Reporter assay;Other	Functional MTI	15538371
MIRT000055	hsa-miR-375	Homo sapiens	PDK1	Homo sapiens	Immunohistochemistry//Luciferase reporter assay//qRT-PCR//Western blot	Functional MTI	21533613
MIRT000055	hsa-miR-375	Homo sapiens	PDK1	Homo sapiens	Western blot	Functional MTI	20215506
MIRT000055	hsa-miR-375	Homo sapiens	PDK1	Homo sapiens	Luciferase reporter assay//Western blot	Functional MTI	24137444
MIRT000055	hsa-miR-375	Homo sapiens	PDK1	Homo sapiens	Luciferase reporter assay	Functional MTI	24481267
MIRT000082	hsa-miR-326	Homo sapiens	GLI1	Homo sapiens	Luciferase reporter assay	Functional MTI	18756266
MIRT000526	hsa-miR-326	Homo sapiens	SMO	Homo sapiens	Luciferase reporter assay//Western blot	Functional MTI	20216554
MIRT000526	hsa-miR-326	Homo sapiens	SMO	Homo sapiens	Luciferase reporter assay//Western blot	Functional MTI	18756266
MIRT000526	hsa-miR-326	Homo sapiens	SMO	Homo sapiens	Western blot	Functional MTI	23341351
MIRT000526	hsa-miR-326	Homo sapiens	SMO	Homo sapiens	Immunofluorescence//qRT-PCR//Luciferase reporter assay//Western blot	Functional MTI	25173582
MIRT000527	hsa-miR-324-5p	Homo sapiens	SMO	Homo sapiens	Luciferase reporter assay//Western blot	Functional MTI	20216554
MIRT000527	hsa-miR-324-5p	Homo sapiens	SMO	Homo sapiens	Luciferase reporter assay//Western blot	Functional MTI	18756266
MIRT000530	hsa-miR-324-5p	Homo sapiens	GLI1	Homo sapiens	Luciferase reporter assay//Western blot	Functional MTI	20216554
MIRT000530	hsa-miR-324-5p	Homo sapiens	GLI1	Homo sapiens	Luciferase reporter assay	Functional MTI	18756266
MIRT000589	hsa-miR-423-3p	Homo sapiens	CDKN1A	Homo sapiens	qRT-PCR//Luciferase reporter assay//Western blot	Functional MTI	20190813
MIRT000593	hsa-miR-299-5p	Homo sapiens	CDKN1A	Homo sapiens	qRT-PCR//Luciferase reporter assay//Western blot	Functional MTI	20190813
MIRT000593	hsa-miR-299-5p	Homo sapiens	CDKN1A	Homo sapiens	Luciferase reporter assay//Western blot	Functional MTI	27347210
MIRT000602	hsa-miR-125a-5p	Homo sapiens	CDKN1A	Homo sapiens	qRT-PCR//Luciferase reporter assay//Western blot	Functional MTI	20190813
MIRT000718	hsa-miR-330-3p	Homo sapiens	E2F1	Homo sapiens	Luciferase reporter assay//Western blot	Functional MTI	19597470
MIRT001076	hsa-miR-133b	Homo sapiens	BCL2L2	Homo sapiens	Western blot//Luciferase reporter assay	Functional MTI	19654003
MIRT001076	hsa-miR-133b	Homo sapiens	BCL2L2	Homo sapiens	Luciferase reporter assay//Western blot	Functional MTI	20056941
MIRT001076	hsa-miR-133b	Homo sapiens	BCL2L2	Homo sapiens	Luciferase reporter assay//qRT-PCR//Western blot	Functional MTI	25414595
MIRT001076	hsa-miR-133b	Homo sapiens	BCL2L2	Homo sapiens	Western blot	Functional MTI	24391788
MIRT001076	hsa-miR-133b	Homo sapiens	BCL2L2	Homo sapiens	Luciferase reporter assay//qRT-PCR//Western blot	Functional MTI	27802259
MIRT001747	hsa-miR-375	Homo sapiens	USP1	Homo sapiens	Reporter assay	Functional MTI	15806104
MIRT001749	hsa-miR-375	Homo sapiens	JAK2	Homo sapiens	Luciferase reporter assay//Western blot//Reporter assay;Western blot	Functional MTI	20548334
MIRT001749	hsa-miR-375	Homo sapiens	JAK2	Homo sapiens	Reporter assay	Functional MTI	15806104
MIRT001749	hsa-miR-375	Homo sapiens	JAK2	Homo sapiens	Immunohistochemistry//Luciferase reporter assay//qRT-PCR//Western blot	Functional MTI	24718681
MIRT001749	hsa-miR-375	Homo sapiens	JAK2	Homo sapiens	Luciferase reporter assay//qRT-PCR	Functional MTI	25055044
MIRT001749	hsa-miR-375	Homo sapiens	JAK2	Homo sapiens	Western blot	Functional MTI	28186962
MIRT001749	hsa-miR-375	Homo sapiens	JAK2	Homo sapiens	Luciferase reporter assay	Functional MTI	28006751
MIRT001750	hsa-miR-375	Homo sapiens	ADIPOR2	Homo sapiens	Reporter assay	Functional MTI	15806104
MIRT001752	hsa-miR-375	Homo sapiens	C1QBP	Homo sapiens	Reporter assay	Functional MTI	15806104
MIRT001815	hsa-miR-133b	Homo sapiens	PKM	Homo sapiens	Western blot	Functional MTI	27073574
MIRT001815	hsa-miR-133b	Homo sapiens	PKM	Homo sapiens	qRT-PCR//Western blot	Functional MTI	28641694
MIRT001953	hsa-miR-129-5p	Homo sapiens	CAMTA1	Homo sapiens	Luciferase reporter assay	Functional MTI	18189265
MIRT001954	hsa-miR-129-5p	Homo sapiens	AGO3	Homo sapiens	Luciferase reporter assay	Functional MTI	18189265
MIRT001964	hsa-miR-320a	Homo sapiens	POLR3D	Homo sapiens	TaqMan miRNA assay/RT-PCR//TaqMan miRNA assay//qRT-PCR	Functional MTI	18852463
MIRT002354	hsa-miR-133b	Homo sapiens	PITX3	Homo sapiens	FACS//Luciferase reporter assay	Functional MTI	17761882
MIRT003052	hsa-miR-133b	Homo sapiens	PTBP2	Homo sapiens	Reporter assay	Functional MTI	17210790
MIRT003057	hsa-miR-375	Homo sapiens	PLAG1	Homo sapiens	Luciferase reporter assay	Functional MTI	19347935
MIRT003260	hsa-miR-133b	Homo sapiens	MCL1	Homo sapiens	Western blot//Luciferase reporter assay	Functional MTI	19654003
MIRT003260	hsa-miR-133b	Homo sapiens	MCL1	Homo sapiens	Luciferase reporter assay//Western blot	Functional MTI	20056941
MIRT003260	hsa-miR-133b	Homo sapiens	MCL1	Homo sapiens	Western blot	Functional MTI	24391788
MIRT003260	hsa-miR-133b	Homo sapiens	MCL1	Homo sapiens	ChIP-seq//Luciferase reporter assay//qRT-PCR//Western blot	Functional MTI	26276722
MIRT003738	hsa-miR-125a-5p	Homo sapiens	LIN28A	Homo sapiens	Luciferase reporter assay	Functional MTI	16227573
MIRT003744	hsa-miR-320a	Homo sapiens	TFRC	Homo sapiens	Luciferase reporter assay	Functional MTI	18523662
MIRT003744	hsa-miR-320a	Homo sapiens	TFRC	Homo sapiens	Luciferase reporter assay	Functional MTI	19164563
MIRT003744	hsa-miR-320a	Homo sapiens	TFRC	Homo sapiens	Luciferase reporter assay//Northern blot//flow	Functional MTI	19135902
MIRT003755	hsa-miR-125a-5p	Homo sapiens	NTRK3	Homo sapiens	Luciferase reporter assay//Western blot	Functional MTI	17483472
MIRT003755	hsa-miR-125a-5p	Homo sapiens	NTRK3	Homo sapiens	Luciferase reporter assay	Functional MTI	19179615
MIRT003755	hsa-miR-125a-5p	Homo sapiens	NTRK3	Homo sapiens	Luciferase reporter assay	Functional MTI	18973228
MIRT004043	hsa-miR-129-5p	Homo sapiens	SOX4	Homo sapiens	Luciferase reporter assay//qRT-PCR//Western blot	Functional MTI	19887623
MIRT004043	hsa-miR-129-5p	Homo sapiens	SOX4	Homo sapiens	Immunohistochemistry//Luciferase reporter assay//qRT-PCR//Western blot	Functional MTI	20331975
MIRT004052	hsa-miR-125a-5p	Homo sapiens	CD34	Homo sapiens	Luciferase reporter assay//Microarray//Western blot//Reporter assay;Western blot	Functional MTI	18308931
MIRT004071	hsa-miR-125a-5p	Homo sapiens	TP53	Homo sapiens	Luciferase reporter assay//Northern blot//qRT-PCR//Western blot	Functional MTI	19818772
MIRT004071	hsa-miR-125a-5p	Homo sapiens	TP53	Homo sapiens	qRT-PCR//Western blot	Functional MTI	26017674
MIRT004279	hsa-miR-127-3p	Homo sapiens	PRDM1	Homo sapiens	qRT-PCR//Luciferase reporter assay//Western blot	Functional MTI	19530237
MIRT004424	hsa-miR-326	Homo sapiens	NOTCH1	Homo sapiens	Western blot//Luciferase reporter assay	Functional MTI	19955368
MIRT004425	hsa-miR-326	Homo sapiens	NOTCH2	Homo sapiens	Western blot//Luciferase reporter assay	Functional MTI	19955368
MIRT004439	hsa-miR-375	Homo sapiens	RASD1	Homo sapiens	Luciferase reporter assay//Microarray//qRT-PCR	Functional MTI	20978187
MIRT004440	hsa-miR-320a	Homo sapiens	MCL1	Homo sapiens	Luciferase reporter assay	Functional MTI	19096009
MIRT004440	hsa-miR-320a	Homo sapiens	MCL1	Homo sapiens	Flow//Immunohistochemistry//Microarray//Northern blot//qRT-PCR//Western blot	Functional MTI	24136787
MIRT004445	hsa-miR-125a-5p	Homo sapiens	VEGFA	Homo sapiens	ELISA//Luciferase reporter assay//qRT-PCR//Western blot	Functional MTI	26398444
MIRT004460	hsa-miR-133b	Homo sapiens	IGF1R	Homo sapiens	Luciferase reporter assay	Functional MTI	19695767
MIRT004460	hsa-miR-133b	Homo sapiens	IGF1R	Homo sapiens	Western blot	Functional MTI	24391788
MIRT004462	hsa-miR-127-3p	Homo sapiens	XBP1	Homo sapiens	Luciferase reporter assay	Functional MTI	19530237
MIRT004463	hsa-miR-127-3p	Homo sapiens	BCL6	Homo sapiens	Luciferase reporter assay	Functional MTI	17581274
MIRT004463	hsa-miR-127-3p	Homo sapiens	BCL6	Homo sapiens	Luciferase reporter assay//Microarray//Northern blot//qRT-PCR//Western blot	Functional MTI	16766263
MIRT004463	hsa-miR-127-3p	Homo sapiens	BCL6	Homo sapiens	Immunoblot//Luciferase reporter assay//qRT-PCR	Functional MTI	24282530
MIRT004478	hsa-miR-375	Homo sapiens	YY1AP1	Homo sapiens	Luciferase reporter assay//Western blot	Functional MTI	20226166
MIRT004508	hsa-miR-320a	Homo sapiens	HSPB6	Homo sapiens	Luciferase reporter assay	Functional MTI	19380620
MIRT004559	hsa-miR-296-5p	Homo sapiens	WNK4	Homo sapiens	Luciferase reporter assay//qRT-PCR//Western blot	Functional MTI	20561597
MIRT004565	hsa-miR-299-5p	Homo sapiens	SPP1	Homo sapiens	immunoblot//qRT-PCR//Luciferase reporter assay//Microarray	Functional MTI	19538464
MIRT004682	hsa-miR-324-3p	Homo sapiens	WNT9B	Homo sapiens	Luciferase reporter assay	Functional MTI	19478946
MIRT004683	hsa-miR-324-3p	Homo sapiens	CREBBP	Homo sapiens	Luciferase reporter assay	Functional MTI	19478946
MIRT004684	hsa-miR-324-3p	Homo sapiens	DVL2	Homo sapiens	Luciferase reporter assay	Functional MTI	19478946
MIRT004747	hsa-miR-326	Homo sapiens	MSH3	Homo sapiens	Luciferase reporter assay//Microarray//qRT-PCR//Western blot	Functional MTI	19883630
MIRT004832	hsa-miR-133b	Homo sapiens	KCNH2	Homo sapiens	Luciferase reporter assay//qRT-PCR//Western blot	Functional MTI	17344217
MIRT004832	hsa-miR-133b	Homo sapiens	KCNH2	Homo sapiens	Luciferase reporter assay//qRT-PCR//Western blot	Functional MTI	25355491
MIRT004900	hsa-miR-296-5p	Homo sapiens	HGS	Homo sapiens	Luciferase reporter assay//Western blot	Functional MTI	18977327
MIRT004900	hsa-miR-296-5p	Homo sapiens	HGS	Homo sapiens	qRT-PCR//Western blot	Functional MTI	26500043
MIRT005117	hsa-miR-125a-5p	Homo sapiens	ERBB3	Homo sapiens	Luciferase reporter assay//Northern blot//qRT-PCR//Western blot	Functional MTI	17110380
MIRT005117	hsa-miR-125a-5p	Homo sapiens	ERBB3	Homo sapiens	Luciferase reporter assay//Microarray//Western blot	Functional MTI	20864407
MIRT005117	hsa-miR-125a-5p	Homo sapiens	ERBB3	Homo sapiens	Western blot//qRT-PCR	Functional MTI	23519125
MIRT005118	hsa-miR-125a-5p	Homo sapiens	ERBB2	Homo sapiens	Luciferase reporter assay//Northern blot//qRT-PCR//Western blot	Functional MTI	17110380
MIRT005118	hsa-miR-125a-5p	Homo sapiens	ERBB2	Homo sapiens	Luciferase reporter assay	Functional MTI	21220473
MIRT005118	hsa-miR-125a-5p	Homo sapiens	ERBB2	Homo sapiens	Western blot//qRT-PCR	Functional MTI	23519125
MIRT005118	hsa-miR-125a-5p	Homo sapiens	ERBB2	Homo sapiens	Luciferase reporter assay//qRT-PCR//Western blot	Functional MTI	25833836
MIRT005339	hsa-miR-125a-5p	Homo sapiens	KLF13	Homo sapiens	ELISA//Luciferase reporter assay//qRT-PCR//Western blot	Functional MTI	20589685
MIRT005339	hsa-miR-125a-5p	Homo sapiens	KLF13	Homo sapiens	Luciferase reporter assay	Functional MTI	24151079
MIRT005350	hsa-miR-125a-5p	Homo sapiens	BAK1	Homo sapiens	Flow//Luciferase reporter assay//qRT-PCR//Western blot	Functional MTI	20616003
MIRT005412	hsa-miR-129-5p	Homo sapiens	NOTCH1	Homo sapiens	Luciferase reporter assay//Microarray	Functional MTI	17150773
MIRT005412	hsa-miR-129-5p	Homo sapiens	NOTCH1	Homo sapiens	Luciferase reporter assay//qRT-PCR	Functional MTI	28410211
MIRT005419	hsa-miR-125a-5p	Homo sapiens	ARID3B	Homo sapiens	Immunofluorescence//qRT-PCR//Western blot	Functional MTI	19881956
MIRT005421	hsa-miR-125a-5p	Homo sapiens	ELAVL1	Homo sapiens	Luciferase reporter assay//Western blot	Functional MTI	19875930
MIRT005520	hsa-miR-326	Homo sapiens	PKM	Homo sapiens	Luciferase reporter assay//qRT-PCR//Western blot	Functional MTI	20667897
MIRT005543	hsa-miR-375	Homo sapiens	ELAVL4	Homo sapiens	GFP reporter assay//Immunohistochemistry//Microarray//qRT-PCR//Western blot//Reporter assay;Western blot;qRT-PCR;Microarray;Other	Functional MTI	20584986
MIRT005603	hsa-miR-193a-5p	Homo sapiens	TP73	Homo sapiens	Immunoblot//Luciferase reporter assay//qRT-PCR//Western blot	Functional MTI	21293058
MIRT005805	hsa-miR-331-3p	Homo sapiens	ERBB2	Homo sapiens	Luciferase reporter assay//Microarray//Western blot	Functional MTI	20864407
MIRT005805	hsa-miR-331-3p	Homo sapiens	ERBB2	Homo sapiens	Flow//Immunohistochemistry//Luciferase reporter assay//qRT-PCR//Western blot	Functional MTI	24775712
MIRT005805	hsa-miR-331-3p	Homo sapiens	ERBB2	Homo sapiens	Luciferase reporter assay	Functional MTI	24148764
MIRT005805	hsa-miR-331-3p	Homo sapiens	ERBB2	Homo sapiens	Luciferase reporter assay//Western blot	Functional MTI	26718987
MIRT005881	hsa-miR-342-3p	Homo sapiens	GEMIN4	Homo sapiens	Luciferase reporter assay//Northern blot//qRT-PCR	Functional MTI	21172025
MIRT005882	hsa-miR-342-3p	Homo sapiens	BMP7	Homo sapiens	Luciferase reporter assay//Northern blot//qRT-PCR	Functional MTI	21172025
MIRT005929	hsa-miR-339-5p	Homo sapiens	BCL6	Homo sapiens	Immunohistochemistry//Luciferase reporter assay//Western blot	Functional MTI	24917186
MIRT005965	hsa-miR-330-3p	Homo sapiens	CDC42	Homo sapiens	Immunohistochemistry//Luciferase reporter assay//Western blot	Functional MTI	21149267
MIRT005965	hsa-miR-330-3p	Homo sapiens	CDC42	Homo sapiens	Luciferase reporter assay//qRT-PCR//Western blot	Functional MTI	23337504
MIRT005968	hsa-miR-330-3p	Homo sapiens	CD44	Homo sapiens	Immunohistochemistry//Luciferase reporter assay//Western blot	Functional MTI	21149267
MIRT006154	hsa-miR-375	Homo sapiens	YAP1	Homo sapiens	Luciferase reporter assay//Microarray//qRT-PCR	Functional MTI	21856745
MIRT006154	hsa-miR-375	Homo sapiens	YAP1	Homo sapiens	Luciferase reporter assay//Western blot//qRT-PCR	Functional MTI	24892549
MIRT006154	hsa-miR-375	Homo sapiens	YAP1	Homo sapiens	Flow//Immunohistochemistry//qRT-PCR//Western blot	Functional MTI	27832783
MIRT006207	hsa-miR-375	Homo sapiens	MTDH	Homo sapiens	Immunofluorescence//Luciferase reporter assay//qRT-PCR//Western blot	Functional MTI	22508479
MIRT006207	hsa-miR-375	Homo sapiens	MTDH	Homo sapiens	Microarray//qRT-PCR//Western blot	Functional MTI	22752059
MIRT006207	hsa-miR-375	Homo sapiens	MTDH	Homo sapiens	Luciferase reporter assay//Microarray//qRT-PCR//Western blot	Functional MTI	25944465
MIRT006364	hsa-miR-331-3p	Homo sapiens	FHIT	Homo sapiens	Luciferase reporter assay	Functional MTI	21711110
MIRT006438	hsa-miR-296-5p	Homo sapiens	SCRIB	Homo sapiens	Luciferase reporter assay	Functional MTI	21643016
MIRT006443	hsa-miR-342-3p	Homo sapiens	DNMT1	Homo sapiens	Luciferase reporter assay//qRT-PCR//Western blot	Functional MTI	21565830
MIRT006443	hsa-miR-342-3p	Homo sapiens	DNMT1	Homo sapiens	Luciferase reporter assay//Microarray//qRT-PCR//Western blot	Functional MTI	27302063
MIRT006471	hsa-miR-125a-5p	Homo sapiens	TNFAIP3	Homo sapiens	qRT-PCR//Western blot	Functional MTI	22550173
MIRT006471	hsa-miR-125a-5p	Homo sapiens	TNFAIP3	Homo sapiens	Luciferase reporter assay//qRT-PCR//Western blot	Functional MTI	26758190
MIRT006497	hsa-miR-320a	Homo sapiens	AQP1	Homo sapiens	Luciferase reporter assay	Functional MTI	20628061
MIRT006498	hsa-miR-320a	Homo sapiens	AQP4	Homo sapiens	Luciferase reporter assay	Functional MTI	20628061
MIRT006506	hsa-miR-331-3p	Homo sapiens	E2F1	Homo sapiens	Luciferase reporter assay//Western blot	Functional MTI	20510161
MIRT006554	hsa-miR-133b	Homo sapiens	FSCN1	Homo sapiens	Luciferase reporter assay//qRT-PCR//Western blot//Reporter assay//Reporter assay;Western blot;qRT-PCR	Functional MTI	21351259
MIRT006554	hsa-miR-133b	Homo sapiens	FSCN1	Homo sapiens	Luciferase reporter assay//qRT-PCR//Western blot	Functional MTI	25433493
MIRT006554	hsa-miR-133b	Homo sapiens	FSCN1	Homo sapiens	Luciferase reporter assay//Western blot	Functional MTI	27900045
MIRT006572	hsa-miR-296-5p	Homo sapiens	IKBKE	Homo sapiens	Luciferase reporter assay	Functional MTI	22114321
MIRT006575	hsa-miR-320a	Homo sapiens	NPR1	Homo sapiens	Luciferase reporter assay//Western blot	Functional MTI	22134529
MIRT006650	hsa-miR-133b	Homo sapiens	FAIM	Homo sapiens	Luciferase reporter assay//Microarray//qRT-PCR//Western blot	Functional MTI	22532850
MIRT006683	hsa-miR-296-5p	Homo sapiens	BBC3	Homo sapiens	Luciferase reporter assay//qRT-PCR//Western blot	Functional MTI	21633093
MIRT006714	hsa-miR-484	Homo sapiens	FIS1	Homo sapiens	ChIP-seq//Immunoblot//LacZ reporter assay//qRT-PCR	Functional MTI	22510686
MIRT006775	hsa-miR-375	Homo sapiens	SP1	Homo sapiens	Luciferase reporter assay	Functional MTI	21945323
MIRT006775	hsa-miR-375	Homo sapiens	SP1	Homo sapiens	qRT-PCR//Western blot	Functional MTI	23435408
MIRT006775	hsa-miR-375	Homo sapiens	SP1	Homo sapiens	Luciferase reporter assay//qRT-PCR//Western blot	Functional MTI	25633534
MIRT006809	hsa-miR-125a-5p	Homo sapiens	SMAD4	Homo sapiens	Luciferase reporter assay//Western blot	Functional MTI	22357933
MIRT006887	hsa-miR-331-3p	Homo sapiens	DOHH	Homo sapiens	Luciferase reporter assay//qRT-PCR//Western blot	Functional MTI	22908221
MIRT006905	hsa-miR-125a-5p	Homo sapiens	MMP11	Homo sapiens	Immunohistochemistry//Luciferase reporter assay//qRT-PCR//Western blot	Functional MTI	22768249
MIRT006922	hsa-miR-330-3p	Homo sapiens	SH3GL2	Homo sapiens	Luciferase reporter assay	Functional MTI	23029364
MIRT006942	hsa-miR-139-5p	Homo sapiens	IGF1R	Homo sapiens	Luciferase reporter assay	Functional MTI	22580051
MIRT006942	hsa-miR-139-5p	Homo sapiens	IGF1R	Homo sapiens	Luciferase reporter assay//Western blot//qRT-PCR	Functional MTI	24942287
MIRT006942	hsa-miR-139-5p	Homo sapiens	IGF1R	Homo sapiens	Luciferase reporter assay//Western blot	Functional MTI	26097570
MIRT006944	hsa-miR-125a-5p	Homo sapiens	HK2	Homo sapiens	Luciferase reporter assay	Functional MTI	22593586
MIRT006953	hsa-miR-127-3p	Homo sapiens	KMT5A	Homo sapiens	Luciferase reporter assay	Functional MTI	22720056
MIRT006953	hsa-miR-127-3p	Homo sapiens	KMT5A	Homo sapiens	Luciferase reporter assay//Western blot	Functional MTI	26707641
MIRT006976	hsa-miR-139-5p	Homo sapiens	FOS	Homo sapiens	qRT-PCR//Western blot	Functional MTI	23001723
MIRT006976	hsa-miR-139-5p	Homo sapiens	FOS	Homo sapiens	qRT-PCR//Western blot	Functional MTI	27668889
MIRT007069	hsa-miR-133b	Homo sapiens	EGFR	Homo sapiens	Flow//In situ hybridization//Luciferase reporter assay//qRT-PCR//Western blot	Functional MTI	22883469
MIRT007069	hsa-miR-133b	Homo sapiens	EGFR	Homo sapiens	Luciferase reporter assay//Western blot	Functional MTI	22407299
MIRT007069	hsa-miR-133b	Homo sapiens	EGFR	Homo sapiens	Luciferase reporter assay//Western blot	Functional MTI	26617770
MIRT007093	hsa-miR-320a	Homo sapiens	MAPK1	Homo sapiens	Luciferase reporter assay	Functional MTI	23196978
MIRT007113	hsa-miR-133b	Homo sapiens	FGFR1	Homo sapiens	Luciferase reporter assay//Western blot//Immunohistochemistry//qRT-PCR	Functional MTI	23296701
MIRT007115	hsa-miR-490-3p	Homo sapiens	ERGIC3	Homo sapiens	GFP reporter assay	Functional MTI	23212913
MIRT007125	hsa-miR-133b	Homo sapiens	CDK13	Homo sapiens	Luciferase reporter assay	Functional MTI	23451058
MIRT007126	hsa-miR-133b	Homo sapiens	PTPRK	Homo sapiens	Luciferase reporter assay	Functional MTI	23451058
MIRT007127	hsa-miR-133b	Homo sapiens	RB1CC1	Homo sapiens	Luciferase reporter assay	Functional MTI	23451058
MIRT007128	hsa-miR-133b	Homo sapiens	CPNE3	Homo sapiens	Luciferase reporter assay	Functional MTI	23451058
MIRT007148	hsa-miR-320d	Homo sapiens	RBFOX2	Homo sapiens	Luciferase reporter assay	Functional MTI	23418466
MIRT007200	hsa-miR-375	Homo sapiens	MAP3K8	Homo sapiens	Luciferase reporter assay	Functional MTI	23430746
MIRT007200	hsa-miR-375	Homo sapiens	MAP3K8	Homo sapiens	Western blot	Functional MTI	28186962
MIRT007255	hsa-miR-375	Homo sapiens	FZD8	Homo sapiens	Luciferase reporter assay	Functional MTI	23393589
MIRT007255	hsa-miR-375	Homo sapiens	FZD8	Homo sapiens	Luciferase reporter assay	Functional MTI	23396279
MIRT007376	hsa-miR-129-5p	Homo sapiens	FMR1	Homo sapiens	Luciferase reporter assay	Functional MTI	23390134
MIRT007382	hsa-miR-133b	Homo sapiens	PRDM16	Homo sapiens	Luciferase reporter assay	Functional MTI	23395168
MIRT016691	hsa-miR-133b	Homo sapiens	MET	Homo sapiens	Reporter assay	Functional MTI	20505319
MIRT016691	hsa-miR-133b	Homo sapiens	MET	Homo sapiens	Western blot	Functional MTI	24391788
MIRT016692	hsa-miR-133b	Homo sapiens	ERG	Homo sapiens	Reporter assay	Functional MTI	17344217
MIRT016693	hsa-miR-133b	Homo sapiens	HCN2	Homo sapiens	Reporter assay	Functional MTI	18458081
MIRT016694	hsa-miR-133b	Homo sapiens	HCN4	Homo sapiens	Reporter assay;Western blot;qRT-PCR;Other	Functional MTI	18458081
MIRT019235	hsa-miR-331-3p	Homo sapiens	PHLPP1	Homo sapiens	Luciferase reporter assay	Functional MTI	24825302
MIRT019236	hsa-miR-331-3p	Homo sapiens	NRP2	Homo sapiens	Luciferase reporter assay//Western blot	Functional MTI	24142150
MIRT019236	hsa-miR-331-3p	Homo sapiens	NRP2	Homo sapiens	Luciferase reporter assay//qRT-PCR//Western blot	Functional MTI	27548144
MIRT019530	hsa-miR-326	Homo sapiens	CD9	Homo sapiens	Western blot;qRT-PCR	Functional MTI	19883630
MIRT019875	hsa-miR-375	Homo sapiens	LDHB	Homo sapiens	Immunohistochemistry//Luciferase reporter assay//Microarray//QRTPCR	Functional MTI	23497265
MIRT019875	hsa-miR-375	Homo sapiens	LDHB	Homo sapiens	Microarray//qRT-PCR//Western blot	Functional MTI	22752059
MIRT019886	hsa-miR-375	Homo sapiens	YWHAZ	Homo sapiens	Reporter assay;Western blot;qRT-PCR;Microarray	Functional MTI	20215506
MIRT019886	hsa-miR-375	Homo sapiens	YWHAZ	Homo sapiens	Immunohistochemistry//qRT-PCR//Western blot	Functional MTI	23422756
MIRT019973	hsa-miR-375	Homo sapiens	CIP2A	Homo sapiens	Luciferase reporter assay//QRTPCR//Western blot	Functional MTI	23552692
MIRT019977	hsa-miR-375	Homo sapiens	RHOA	Homo sapiens	Western blot;qRT-PCR;Microarray	Functional MTI	20584986
MIRT020062	hsa-miR-375	Homo sapiens	SEC23A	Homo sapiens	Flow//Immunohistochemistry//qRT-PCR//Western blot	Functional MTI	27832783
MIRT020071	hsa-miR-375	Homo sapiens	KCNQ2	Homo sapiens	Western blot;qRT-PCR;Microarray	Functional MTI	20584986
MIRT021307	hsa-miR-125a-5p	Homo sapiens	EIF4EBP1	Homo sapiens	Luciferase reporter assay//qRT-PCR//Western blot	Functional MTI	26646586
MIRT036232	hsa-miR-320b	Homo sapiens	MYC	Homo sapiens	Luciferase reporter assay//qRT-PCR//Western blot	Functional MTI	26487644
MIRT042141	hsa-miR-484	Homo sapiens	SMAD2	Homo sapiens	GFP reporter assay//Western blot	Functional MTI	28286418
MIRT044504	hsa-miR-320a	Homo sapiens	IGF1R	Homo sapiens	Luciferase reporter assay	Functional MTI	24161401
MIRT044613	hsa-miR-320a	Homo sapiens	HOXA10	Homo sapiens	Luciferase reporter assay//qRT-PCR//Western blot	Functional MTI	26741129
MIRT044725	hsa-miR-320a	Homo sapiens	ARPP19	Homo sapiens	Luciferase reporter assay//qRT-PCR//Western blot	Functional MTI	25736597
MIRT044747	hsa-miR-320a	Homo sapiens	VDAC1	Homo sapiens	In situ hybridization//Luciferase reporter assay//qRT-PCR//Western blot	Functional MTI	27761954
MIRT044747	hsa-miR-320a	Homo sapiens	VDAC1	Homo sapiens	Immunoblot//Luciferase reporter assay//qRT-PCR//Western blot	Functional MTI	27304056
MIRT044747	hsa-miR-320a	Homo sapiens	VDAC1	Homo sapiens	Luciferase reporter assay//qRT-PCR//Western blot	Functional MTI	27229534
MIRT044747	hsa-miR-320a	Homo sapiens	VDAC1	Homo sapiens	qRT-PCR//Western blot	Functional MTI	26472185
MIRT044759	hsa-miR-320a	Homo sapiens	MYC	Homo sapiens	Luciferase reporter assay//qRT-PCR//Western blot	Functional MTI	28243124
MIRT052938	hsa-miR-133b	Homo sapiens	STK3	Homo sapiens	Luciferase reporter assay//qRT-PCR//Western blot//Immunoblot//Microarray	Functional MTI	22179829
MIRT053049	hsa-miR-139-5p	Homo sapiens	MCL1	Homo sapiens	Immunohistochemistry//Luciferase reporter assay//qRT-PCR//Western blot	Functional MTI	23557151
MIRT053049	hsa-miR-139-5p	Homo sapiens	MCL1	Homo sapiens	Immunohistochemistry//Luciferase reporter assay//qRT-PCR//Western blot	Functional MTI	23551751
MIRT053055	hsa-miR-339-5p	Homo sapiens	PTP4A1	Homo sapiens	Luciferase reporter assay//qRT-PCR//Western blot	Functional MTI	23696794
MIRT053120	hsa-miR-127-3p	Homo sapiens	MMP13	Homo sapiens	Luciferase reporter assay	Functional MTI	23762330
MIRT053177	hsa-miR-133b	Homo sapiens	CDC42	Homo sapiens	Immunoblot//Luciferase reporter assay//Microarray	Functional MTI	22179829
MIRT053177	hsa-miR-133b	Homo sapiens	CDC42	Homo sapiens	Luciferase reporter assay//qRT-PCR//Western blot	Functional MTI	25152372
MIRT053178	hsa-miR-133b	Homo sapiens	RHOA	Homo sapiens	Immunoblot//Luciferase reporter assay//Microarray//qRT-PCR//Western blot	Functional MTI	22179829
MIRT053295	hsa-miR-486-5p	Homo sapiens	ARHGAP5	Homo sapiens	Immunohistochemistry//Luciferase reporter assay//qRT-PCR//Western blot	Functional MTI	23474761
MIRT053473	hsa-miR-486-5p	Homo sapiens	OLFM4	Homo sapiens	In situ hybridization//Luciferase reporter assay//Microarray//qRT-PCR//Western blot	Functional MTI	21415212
MIRT053490	hsa-miR-574-3p	Homo sapiens	CUL2	Homo sapiens	Microarray//qRT-PCR//Western blot	Functional MTI	22683180
MIRT053533	hsa-miR-375	Homo sapiens	TP53	Homo sapiens	Flow//Luciferase reporter assay//qRT-PCR//Western blot	Functional MTI	23835407
MIRT053562	hsa-miR-127-3p	Homo sapiens	MAPK4	Homo sapiens	Luciferase reporter assay//qRT-PCR//Western blot	Functional MTI	23880861
MIRT053575	hsa-miR-129-5p	Homo sapiens	CDK6	Homo sapiens	qRT-PCR//Western blot	Functional MTI	24055727
MIRT053596	hsa-miR-133b	Homo sapiens	GLI1	Homo sapiens	Luciferase reporter assay//qRT-PCR//Western blot	Functional MTI	24443799
MIRT053758	hsa-miR-133b	Homo sapiens	SP1	Homo sapiens	Immunofluorescence//Luciferase reporter assay//Western blot	Functional MTI	24613927
MIRT053780	hsa-miR-375	Homo sapiens	ERBB2	Homo sapiens	Luciferase reporter assay//qRT-PCR//Western blot	Functional MTI	24926380
MIRT053780	hsa-miR-375	Homo sapiens	ERBB2	Homo sapiens	Flow//qRT-PCR//Western blot	Functional MTI	26893657
MIRT053792	hsa-miR-125a-5p	Homo sapiens	LIFR	Homo sapiens	Luciferase reporter assay//Western blot	Functional MTI	21788734
MIRT053792	hsa-miR-125a-5p	Homo sapiens	LIFR	Homo sapiens	Luciferase reporter assay//Western blot	Functional MTI	25962054
MIRT054128	hsa-miR-129-5p	Homo sapiens	BDKRB2	Homo sapiens	Luciferase reporter assay//qRT-PCR	Functional MTI	25008064
MIRT054152	hsa-miR-129-5p	Homo sapiens	ABCB1	Homo sapiens	Immunohistochemistry//Luciferase reporter assay//Microarray//qRT-PCR//Western blot	Functional MTI	25344911
MIRT054152	hsa-miR-129-5p	Homo sapiens	ABCB1	Homo sapiens	Luciferase reporter assay//qRT-PCR//Western blot	Functional MTI	28012924
MIRT054153	hsa-miR-129-5p	Homo sapiens	ABCC5	Homo sapiens	Immunohistochemistry//Luciferase reporter assay//Microarray//qRT-PCR//Western blot	Functional MTI	25344911
MIRT054154	hsa-miR-129-5p	Homo sapiens	ABCG1	Homo sapiens	Immunohistochemistry//Luciferase reporter assay//Microarray//qRT-PCR//Western blot	Functional MTI	25344911
MIRT054157	hsa-miR-296-5p	Homo sapiens	CDX1	Homo sapiens	Immunohistochemistry//Luciferase reporter assay//Microarray//qRT-PCR//Western blot	Functional MTI	23353818
MIRT054160	hsa-miR-139-5p	Homo sapiens	CXCR4	Homo sapiens	ChIP-seq//Flow//Immunohistochemistry//In situ hybridization//Luciferase reporter assay//Microarray//Northern blot//qRT-PCR//Western blot	Functional MTI	21925125
MIRT054160	hsa-miR-139-5p	Homo sapiens	CXCR4	Homo sapiens	Immunohistochemistry//In situ hybridization//Luciferase reporter assay//qRT-PCR//Western blot	Functional MTI	24318902
MIRT054242	hsa-miR-574-3p	Homo sapiens	RAC1	Homo sapiens	Luciferase reporter assay//Microarray//qRT-PCR//Western blot	Functional MTI	23554959
MIRT054243	hsa-miR-574-3p	Homo sapiens	EGFR	Homo sapiens	Luciferase reporter assay//Microarray//qRT-PCR//Western blot	Functional MTI	23554959
MIRT054244	hsa-miR-574-3p	Homo sapiens	EP300	Homo sapiens	Luciferase reporter assay//Microarray//qRT-PCR//Western blot	Functional MTI	23554959
MIRT054258	hsa-miR-139-5p	Homo sapiens	JUN	Homo sapiens	ChIP-seq//Flow//Luciferase reporter assay//qRT-PCR//Western blot	Functional MTI	25499265
MIRT054259	hsa-miR-490-3p	Homo sapiens	SMARCD1	Homo sapiens	ChIP-seq//Luciferase reporter assay//Microarray//qRT-PCR//Western blot	Functional MTI	25503559
MIRT054351	hsa-miR-574-3p	Homo sapiens	RXRA	Homo sapiens	Luciferase reporter assay//Microarray//qRT-PCR//Western blot	Functional MTI	23626837
MIRT054410	hsa-miR-139-5p	Homo sapiens	NR5A2	Homo sapiens	Luciferase reporter assay//qRT-PCR//Western blot	Functional MTI	24204738
MIRT054476	hsa-miR-320a	Homo sapiens	ITGB3	Homo sapiens	Luciferase reporter assay//qRT-PCR//Western blot	Functional MTI	24443232
MIRT054476	hsa-miR-320a	Homo sapiens	ITGB3	Homo sapiens	Immunofluorescence//Luciferase reporter assay//Western blot	Functional MTI	25924850
MIRT054488	hsa-miR-320a	Homo sapiens	GNAI1	Homo sapiens	Luciferase reporter assay//Western blot//Immunohistochemical (IHC) staining	Functional MTI	23691483
MIRT054490	hsa-miR-320d	Homo sapiens	GNAI1	Homo sapiens	Luciferase reporter assay//Western blot//Immunohistochemical (IHC) staining	Functional MTI	23691483
MIRT054558	hsa-miR-375	Homo sapiens	IGF1R	Homo sapiens	Luciferase reporter assay//qRT-PCR//Western blot	Functional MTI	24571711
MIRT054647	hsa-miR-320a	Homo sapiens	RAC1	Homo sapiens	Immunoblot//Immunohistochemistry//Luciferase reporter assay//qRT-PCR	Functional MTI	24265291
MIRT054763	hsa-miR-139-5p	Homo sapiens	NOTCH1	Homo sapiens	Luciferase reporter assay//Wstern blot	Functional MTI	24885920
MIRT054763	hsa-miR-139-5p	Homo sapiens	NOTCH1	Homo sapiens	Luciferase reporter assay//qRT-PCR//Western blot	Functional MTI	27738333
MIRT054763	hsa-miR-139-5p	Homo sapiens	NOTCH1	Homo sapiens	Luciferase reporter assay//qRT-PCR//Western blot	Functional MTI	26299922
MIRT054807	hsa-miR-139-5p	Homo sapiens	RAP1B	Homo sapiens	Luciferase reporter assay//Western blot//qRT-PCR	Functional MTI	24942287
MIRT054808	hsa-miR-139-5p	Homo sapiens	ROCK2	Homo sapiens	Luciferase reporter assay//Western blot//qRT-PCR	Functional MTI	24942287
MIRT054827	hsa-miR-133b	Homo sapiens	TAGLN2	Homo sapiens	Immunoflourescence//Luciferase reporter assay//QRTPCR//Western blot	Functional MTI	24959893
MIRT054839	hsa-miR-375	Homo sapiens	PIK3CA	Homo sapiens	Luciferase reporter assay//qRT-PCR//Quantitative proteomic approach//Western blot	Functional MTI	24440701
MIRT054840	hsa-miR-490-3p	Homo sapiens	CCND1	Homo sapiens	Luciferase reporter assay//qRT-PCR//Western blot	Functional MTI	24440705
MIRT054875	hsa-miR-133b	Homo sapiens	AKT1	Homo sapiens	Luciferase reporter assay//qRT-PCR//Western blot	Functional MTI	25414595
MIRT054884	hsa-miR-342-3p	Homo sapiens	ID4	Homo sapiens	Luciferase reporter assay//qRT-PCR//Western blot	Functional MTI	24475217
MIRT054888	hsa-miR-125a-5p	Homo sapiens	EGFR	Homo sapiens	qRT-PCR//Western blot	Functional MTI	24484870
MIRT063471	hsa-miR-127-3p	Homo sapiens	SKI	Homo sapiens	Luciferase reporter assay//qRT-PCR//Western blot	Functional MTI	24517116
MIRT121568	hsa-miR-129-5p	Homo sapiens	APC	Homo sapiens	Luciferase reporter assay	Functional MTI	24194897
MIRT125926	hsa-miR-320a	Homo sapiens	PDCD4	Homo sapiens	Luciferase reporter assay//qRT-PCR//Western blot	Functional MTI	27279541
MIRT187423	hsa-miR-129-5p	Homo sapiens	SP1	Homo sapiens	Luciferase reporter assay//qRT-PCR//Western blot	Functional MTI	24358111
MIRT253103	hsa-miR-125a-5p	Homo sapiens	BCL2L12	Homo sapiens	Luciferase reporter assay//qRT-PCR//Western blot	Functional MTI	26297542
MIRT262091	hsa-miR-320a	Homo sapiens	BMI1	Homo sapiens	Luciferase reporter assay//qRT-PCR//Western blot	Functional MTI	25171860
MIRT271966	hsa-miR-320a	Homo sapiens	ARF1	Homo sapiens	Luciferase reporter assay//Western blot	Functional MTI	24084574
MIRT364544	hsa-miR-320a	Homo sapiens	PBX3	Homo sapiens	Luciferase reporter assay//qRT-PCR//Western blot	Functional MTI	28404547
MIRT364544	hsa-miR-320a	Homo sapiens	PBX3	Homo sapiens	Luciferase reporter assay	Functional MTI	27086852
MIRT364544	hsa-miR-320a	Homo sapiens	PBX3	Homo sapiens	Immunohistochemistry//Luciferase reporter assay//qRT-PCR//Western blot	Functional MTI	28288874
MIRT387672	hsa-miR-125a-5p	Homo sapiens	BCL2	Homo sapiens	Luciferase reporter assay//qRT-PCR//Western blot	Functional MTI	26297542
MIRT437471	hsa-miR-320a	Homo sapiens	NRP1	Homo sapiens	Luciferase reporter assay//qRT-PCR//Western blot	Functional MTI	24114198
MIRT437513	hsa-miR-490-3p	Homo sapiens	PAPPA	Homo sapiens	ChIP-seq//ELISA//Luciferase reporter assay//Microarray//qRT-PCR//Western blot	Functional MTI	23821525
MIRT437801	hsa-miR-330-3p	Homo sapiens	SP1	Homo sapiens	Luciferase reporter assay	Functional MTI	23670210
MIRT437807	hsa-miR-125a-5p	Homo sapiens	LFNG	Homo sapiens	Luciferase reporter assay	Functional MTI	23484856
MIRT437825	hsa-miR-125a-5p	Homo sapiens	IFNG	Homo sapiens	ELISA//Microarray//qRT-PCR//Western blot//silico analysis	Functional MTI	24759737
MIRT437828	hsa-miR-324-3p	Homo sapiens	WNT2B	Homo sapiens	Luciferase reporter assay	Functional MTI	23583221
MIRT437828	hsa-miR-324-3p	Homo sapiens	WNT2B	Homo sapiens	qRT-PCR//Western blot	Functional MTI	28053597
MIRT437906	hsa-miR-125a-5p	Homo sapiens	ESRRA	Homo sapiens	Luciferase reporter assay//Western blot	Functional MTI	25266720
MIRT438046	hsa-miR-125a-5p	Homo sapiens	TRAF6	Homo sapiens	Luciferase reporter assay//qRT-PCR//Western blot	Functional MTI	24360988
MIRT438049	hsa-miR-339-5p	Homo sapiens	BACE1	Homo sapiens	Luciferase reporter assay//qRT-PCR//Western blot	Functional MTI	24352696
MIRT438066	hsa-miR-342-3p	Homo sapiens	SREBF1	Homo sapiens	Luciferase reporter assay//qRT-PCR//Western blot	Functional MTI	23951060
MIRT438067	hsa-miR-342-3p	Homo sapiens	SREBF2	Homo sapiens	Luciferase reporter assay//qRT-PCR//Western blot	Functional MTI	23951060
MIRT438105	hsa-miR-326	Homo sapiens	NOB1	Homo sapiens	Luciferase reporter assay	Functional MTI	23869222
MIRT438105	hsa-miR-326	Homo sapiens	NOB1	Homo sapiens	Luciferase reporter assay//qRT-PCR//Western blot	Functional MTI	27733214
MIRT438128	hsa-miR-296-5p	Homo sapiens	PIN1	Homo sapiens	Luciferase reporter assay	Functional MTI	24915000
MIRT438164	hsa-miR-375	Homo sapiens	PHLPP1	Homo sapiens	Luciferase reporter assay//Northern blot//qRT-PCR//Western blot	Functional MTI	24337069
MIRT438212	hsa-miR-139-5p	Homo sapiens	FAM162A	Homo sapiens	Luciferase reporter assay	Functional MTI	24333693
MIRT438214	hsa-miR-133b	Homo sapiens	CXCR4	Homo sapiens	Luciferase reporter assay//qRT-PCR//Western blot	Functional MTI	24330809
MIRT438251	hsa-miR-133b	Homo sapiens	MMP9	Homo sapiens	Luciferase reporter assay	Functional MTI	24714873
MIRT438271	hsa-miR-127-3p	Homo sapiens	SEPT7	Homo sapiens	Luciferase reporter assay	Functional MTI	24604520
MIRT438272	hsa-miR-320a	Homo sapiens	NFATC3	Homo sapiens	Luciferase reporter assay//qRT-PCR//Western blot	Functional MTI	25159093
MIRT438273	hsa-miR-320a	Homo sapiens	TRPC5	Homo sapiens	Luciferase reporter assay//qRT-PCR//Western blot	Functional MTI	25159093
MIRT438278	hsa-miR-127-3p	Homo sapiens	RGMA	Homo sapiens	Luciferase reporter assay//qRT-PCR//Western blot	Functional MTI	24517116
MIRT438279	hsa-miR-127-3p	Homo sapiens	ZWINT	Homo sapiens	Luciferase reporter assay//qRT-PCR//Western blot	Functional MTI	24517116
MIRT438280	hsa-miR-127-3p	Homo sapiens	SFRP1	Homo sapiens	Luciferase reporter assay//qRT-PCR//Western blot	Functional MTI	24517116
MIRT438281	hsa-miR-127-3p	Homo sapiens	SERPINB9	Homo sapiens	Luciferase reporter assay//qRT-PCR//Western blot	Functional MTI	24517116
MIRT438303	hsa-miR-133b	Homo sapiens	CTGF	Homo sapiens	Luciferase reporter assay	Functional MTI	24065814
MIRT438303	hsa-miR-133b	Homo sapiens	CTGF	Homo sapiens	Immunohistochemistry//Luciferase reporter assay//qRT-PCR//Western blot	Functional MTI	25451078
MIRT438303	hsa-miR-133b	Homo sapiens	CTGF	Homo sapiens	Immunofluorescence//Immunohistochemistry//In situ hybridization//Luciferase reporter assay//qRT-PCR//Western blot	Functional MTI	26945106
MIRT438361	hsa-miR-331-3p	Homo sapiens	HOTAIR	Homo sapiens	Flow//Immunohistochemistry//Luciferase reporter assay//qRT-PCR//Western blot	Functional MTI	24775712
MIRT438384	hsa-miR-125a-5p	Homo sapiens	VPS51	Homo sapiens	Luciferase reporter assay	Functional MTI	25172656
MIRT438404	hsa-miR-326	Homo sapiens	CD274	Homo sapiens	Luciferase reporter assay//qRT-PCR	Functional MTI	24577056
MIRT438447	hsa-miR-125a-5p	Homo sapiens	SIRT7	Homo sapiens	Flow//Immunoblot//Luciferase reporter assay//Microarray//Northern blot//qRT-PCR//Western blot	Functional MTI	23079745
MIRT438486	hsa-miR-320a	Homo sapiens	PTEN	Homo sapiens	Luciferase reporter assay	Functional MTI	24161401
MIRT438490	hsa-miR-139-5p	Homo sapiens	RHOT1	Homo sapiens	Luciferase reporter assay	Functional MTI	24158791
MIRT438491	hsa-miR-139-5p	Homo sapiens	ZHX2	Homo sapiens	Luciferase reporter assay	Functional MTI	24158791
MIRT438492	hsa-miR-139-5p	Homo sapiens	PIK3CA	Homo sapiens	Luciferase reporter assay	Functional MTI	24158791
MIRT438493	hsa-miR-139-5p	Homo sapiens	NFKB1	Homo sapiens	Luciferase reporter assay	Functional MTI	24158791
MIRT438494	hsa-miR-139-5p	Homo sapiens	HRAS	Homo sapiens	Luciferase reporter assay	Functional MTI	24158791
MIRT438500	hsa-miR-125a-5p	Homo sapiens	CLEC5A	Homo sapiens	Luciferase reporter assay//qRT-PCR	Functional MTI	24216483
MIRT438505	hsa-miR-193a-5p	Homo sapiens	ERBB2	Homo sapiens	Luciferase reporter assay	Functional MTI	24148764
MIRT438505	hsa-miR-193a-5p	Homo sapiens	ERBB2	Homo sapiens	Luciferase reporter assay	Functional MTI	27203740
MIRT438580	hsa-miR-133b	Homo sapiens	FOXL2	Homo sapiens	ChIP-seq//Luciferase reporter assay//qRT-PCR//Western blot	Functional MTI	23810756
MIRT438652	hsa-miR-320a	Homo sapiens	BANP	Homo sapiens	ChIP-seq//Luciferase reporter assay//qRT-PCR//Western blot	Functional MTI	23876508
MIRT438711	hsa-miR-486-5p	Homo sapiens	IGF1R	Homo sapiens	Luciferase reporter assay//qRT-PCR//Western blot	Functional MTI	23980150
MIRT438713	hsa-miR-129-5p	Homo sapiens	RET	Homo sapiens	qRT-PCR//Western blot	Functional MTI	24631532
MIRT438814	hsa-miR-486-5p	Homo sapiens	DOCK3	Homo sapiens	Immunofluorescence//Immunohistochemistry//Immunoprecipitaion//Luciferase reporter assay//qRT-PCR//Western blot	Functional MTI	24789910
MIRT528157	hsa-miR-324-3p	Homo sapiens	BCL2L1	Homo sapiens	Luciferase reporter assay//Microarray//qRT-PCR//Western blot	Functional MTI	27245778
MIRT628130	hsa-miR-129-5p	Homo sapiens	HMGB1	Homo sapiens	Luciferase reporter assay//qRT-PCR//Western blot	Functional MTI	26720492
MIRT628130	hsa-miR-129-5p	Homo sapiens	HMGB1	Homo sapiens	Immunohistochemistry//Luciferase reporter assay//qRT-PCR//Western blot	Functional MTI	27191994
MIRT731262	hsa-miR-129-5p	Homo sapiens	NR4A2	Homo sapiens	Luciferase reporter assay	Functional MTI	26824182
MIRT731279	hsa-miR-330-3p	Homo sapiens	CCBE1	Homo sapiens	Luciferase reporter assay//Microarray//qRT-PCR//Western blot	Functional MTI	28419078
MIRT731367	hsa-miR-486-5p	Homo sapiens	FBN1	Homo sapiens	Luciferase reporter assay	Functional MTI	27133060
MIRT731368	hsa-miR-125a-5p	Homo sapiens	GALNT14	Homo sapiens	Luciferase reporter assay//qRT-PCR//Western blot	Functional MTI	27133078
MIRT731497	hsa-miR-320a	Homo sapiens	RAB14	Homo sapiens	Immunohistochemistry//Luciferase reporter assay//qRT-PCR//Western blot	Functional MTI	27994670
MIRT731550	hsa-miR-139-5p	Homo sapiens	OIP5	Homo sapiens	Luciferase reporter assay//qRT-PCR//Western blot	Functional MTI	27916718
MIRT731583	hsa-miR-486-5p	Homo sapiens	CDK4	Homo sapiens	Luciferase reporter assay	Functional MTI	27049724
MIRT731587	hsa-miR-296-5p	Homo sapiens	ELAVL1	Homo sapiens	Luciferase reporter assay	Functional MTI	26898797
MIRT731604	hsa-miR-193a-5p	Homo sapiens	SRR	Homo sapiens	Luciferase reporter assay	Functional MTI	26913720
MIRT731605	hsa-miR-193a-5p	Homo sapiens	IGF2BP1	Homo sapiens	Luciferase reporter assay	Functional MTI	26917013
MIRT731620	hsa-miR-133b	Homo sapiens	FAS	Homo sapiens	Luciferase reporter assay	Functional MTI	26919791
MIRT731625	hsa-miR-125a-5p	Homo sapiens	STAT3	Homo sapiens	Immunoblot//Luciferase reporter assay//qRT-PCR//Immunohistochemistry	Functional MTI	26389681
MIRT731629	hsa-miR-139-5p	Homo sapiens	ACTC1	Homo sapiens	Luciferase reporter assay	Functional MTI	27139165
MIRT731643	hsa-miR-133b	Homo sapiens	SIRT1	Homo sapiens	Luciferase reporter assay	Functional MTI	27166997
MIRT731643	hsa-miR-133b	Homo sapiens	SIRT1	Homo sapiens	Luciferase reporter assay	Functional MTI	27090017
MIRT731708	hsa-miR-296-5p	Homo sapiens	S100B	Homo sapiens	Luciferase reporter assay//qRT-PCR//Western blot	Functional MTI	27186401
MIRT731739	hsa-miR-331-3p	Homo sapiens	ING5	Homo sapiens	Immunohistochemistry//Luciferase reporter assay//qRT-PCR//Western blot	Functional MTI	26497554
MIRT731754	hsa-miR-486-5p	Homo sapiens	CIT	Homo sapiens	ChIP-seq//Luciferase reporter assay//Next Generation Sequencing (NGS)//pSILAC//qRT-PCR//Western blot	Functional MTI	26183718
MIRT731762	hsa-miR-326	Homo sapiens	HOTAIR	Homo sapiens	Immunohistochemistry//Luciferase reporter assay//qRT-PCR//Western blot	Functional MTI	26183397
MIRT731763	hsa-miR-326	Homo sapiens	FGF1	Homo sapiens	Immunohistochemistry//Luciferase reporter assay//qRT-PCR//Western blot	Functional MTI	26183397
MIRT731772	hsa-miR-133b	Homo sapiens	BCL2L1	Homo sapiens	ChIP-seq//Luciferase reporter assay//qRT-PCR//Western blot	Functional MTI	26276722
MIRT731779	hsa-miR-125a-5p	Homo sapiens	MCL1	Homo sapiens	Luciferase reporter assay//qRT-PCR//Western blot	Functional MTI	26297542
MIRT731784	hsa-miR-139-5p	Homo sapiens	ADGRL4	Homo sapiens	Luciferase reporter assay//Western blot	Functional MTI	26449464
MIRT731794	hsa-miR-320a	Homo sapiens	SUZ12	Homo sapiens	Immunofluorescence//Luciferase reporter assay//Western blot	Functional MTI	27582550
MIRT731821	hsa-miR-139-5p	Homo sapiens	SMARCA4	Homo sapiens	Northern blot//qRT-PCR//Western blot	Functional MTI	27605510
MIRT731831	hsa-miR-125a-5p	Homo sapiens	NAIF1	Homo sapiens	Luciferase reporter assay//qRT-PCR//Western blot	Functional MTI	26719710
MIRT731858	hsa-miR-339-5p	Homo sapiens	NOVA1	Homo sapiens	Luciferase reporter assay//qRT-PCR//Western blot	Functional MTI	26391641
MIRT731875	hsa-miR-574-3p	Homo sapiens	SMAD4	Homo sapiens	Luciferase reporter assay//qRT-PCR//Western blot	Functional MTI	28105233
MIRT731901	hsa-miR-139-5p	Homo sapiens	TPD52	Homo sapiens	Luciferase reporter assay//qRT-PCR//Western blot	Functional MTI	27785063
MIRT731906	hsa-miR-299-5p	Homo sapiens	ATG5	Homo sapiens	Luciferase reporter assay	Functional MTI	27080144
MIRT731927	hsa-miR-320a	Homo sapiens	FOXM1	Homo sapiens	Luciferase reporter assay//Immunohistochemistry//qRT-PCR//Western blot	Functional MTI	27086911
MIRT731936	hsa-miR-320a	Homo sapiens	KITLG	Homo sapiens	Luciferase reporter assay//qRT-PCR//Western blot	Functional MTI	27896428
MIRT731938	hsa-miR-320a	Homo sapiens	RUNX2	Homo sapiens	Luciferase reporter assay//qRT-PCR//Western blot	Functional MTI	27965096
MIRT731991	hsa-miR-125a-5p	Homo sapiens	MAPK14	Homo sapiens	Luciferase reporter assay	Functional MTI	28386337
MIRT731994	hsa-miR-490-3p	Homo sapiens	ABCC2	Homo sapiens	Immunohistochemistry//Luciferase reporter assay//qRT-PCR//Western blot	Functional MTI	28386339
MIRT732019	hsa-miR-129-5p	Homo sapiens	WNT4	Homo sapiens	Luciferase reporter assay//Western blot	Functional MTI	27556296
MIRT732083	hsa-miR-139-5p	Homo sapiens	MET	Homo sapiens	Immunofluorescence//Luciferase reporter assay//qRT-PCR//Western blot	Functional MTI	26497851
MIRT732084	hsa-miR-375	Homo sapiens	LRP5	Homo sapiens	Luciferase reporter assay	Functional MTI	28158288
MIRT732085	hsa-miR-375	Homo sapiens	CTNNB1	Homo sapiens	Luciferase reporter assay	Functional MTI	28158288
MIRT732109	hsa-miR-296-5p	Homo sapiens	PLK1	Homo sapiens	Luciferase reporter assay//Western blot	Functional MTI	26549165
MIRT732169	hsa-miR-125a-5p	Homo sapiens	EDN1	Homo sapiens	Luciferase reporter assay	Functional MTI	27106952
MIRT732185	hsa-miR-125a-5p	Homo sapiens	CASP2	Homo sapiens	Flow//Luciferase reporter assay//qRT-PCR//Western blot	Functional MTI	26962687
MIRT732226	hsa-miR-490-3p	Homo sapiens	TGFBR1	Homo sapiens	Luciferase reporter assay//Western blot	Functional MTI	26714817
MIRT732232	hsa-miR-139-5p	Homo sapiens	BCL2	Homo sapiens	Luciferase reporter assay//qRT-PCR//Western blot	Functional MTI	27244080
MIRT732269	hsa-miR-193a-5p	Homo sapiens	NLN	Homo sapiens	Luciferase reporter assay//Microarray//qRT-PCR//Western blot	Functional MTI	27307030
MIRT732374	hsa-miR-320a	Homo sapiens	MTDH	Homo sapiens	Immunohistochemistry//Luciferase reporter assay//qRT-PCR//Western blot//Chromogenic in situ hybridization	Functional MTI	27229534
MIRT732375	hsa-miR-320a	Homo sapiens	YWHAZ	Homo sapiens	Luciferase reporter assay//qRT-PCR	Functional MTI	27229534
MIRT732518	hsa-miR-342-3p	Homo sapiens	IKBKG	Homo sapiens	qRT-PCR//Western blot	Functional MTI	25580008
MIRT732519	hsa-miR-342-3p	Homo sapiens	TAB2	Homo sapiens	qRT-PCR//Western blot	Functional MTI	25580008
MIRT732520	hsa-miR-342-3p	Homo sapiens	TAB3	Homo sapiens	qRT-PCR//Western blot	Functional MTI	25580008
MIRT732551	hsa-miR-490-3p	Homo sapiens	HMGA2	Homo sapiens	Luciferase reporter assay//qRT-PCR//Western blot	Functional MTI	26341146
MIRT732557	hsa-miR-486-5p	Homo sapiens	SMAD2	Homo sapiens	Luciferase reporter assay//qRT-PCR//Western blot	Functional MTI	26370615
MIRT732583	hsa-miR-320a	Homo sapiens	VEGFA	Homo sapiens	Western blot	Functional MTI	26837315
MIRT732589	hsa-miR-490-3p	Homo sapiens	TGFA	Homo sapiens	Luciferase reporter assay	Functional MTI	26843615
MIRT732705	hsa-miR-129-5p	Homo sapiens	PDPK1	Homo sapiens	Luciferase reporter assay	Functional MTI	26884980
MIRT732710	hsa-miR-125a-5p	Homo sapiens	DLL4	Homo sapiens	Flow//Immunofluorescence//Luciferase reporter assay//Western blot	Functional MTI	27252357
MIRT732714	hsa-miR-125a-5p	Homo sapiens	ABL2	Homo sapiens	Luciferase reporter assay//qRT-PCR//Western blot	Functional MTI	26766902
MIRT732722	hsa-miR-296-5p	Homo sapiens	HMGA1	Homo sapiens	Luciferase reporter assay	Functional MTI	26898758
MIRT732815	hsa-miR-486-5p	Homo sapiens	SNAI1	Homo sapiens	Luciferase reporter assay//Western blot	Functional MTI	27877055
MIRT732822	hsa-miR-490-3p	Homo sapiens	RHOA	Homo sapiens	Immunohistochemistry//Luciferase reporter assay//Western blot	Functional MTI	27524906
MIRT732862	hsa-miR-324-5p	Homo sapiens	CD274	Homo sapiens	Luciferase reporter assay	Functional MTI	27080341
MIRT732905	hsa-miR-125a-5p	Homo sapiens	TAZ	Homo sapiens	Luciferase reporter assay	Functional MTI	27094723
MIRT733005	hsa-miR-486-5p	Homo sapiens	NRP2	Homo sapiens	Luciferase reporter assay//Western blot	Functional MTI	27284245
MIRT733066	hsa-miR-490-3p	Homo sapiens	PCBP1	Homo sapiens	Immunohistochemistry//Luciferase reporter assay//qRT-PCR//Western blot	Functional MTI	27648147
MIRT733102	hsa-miR-125a-5p	Homo sapiens	HAX1	Homo sapiens	Luciferase reporter assay//qRT-PCR//Western blot	Functional MTI	27880721
MIRT733105	hsa-miR-342-3p	Homo sapiens	CTBP2	Homo sapiens	Luciferase reporter assay//qRT-PCR//Western blot	Functional MTI	25895816
MIRT733126	hsa-miR-326	Homo sapiens	FSCN1	Homo sapiens	Luciferase reporter assay//qRT-PCR//Western blot	Functional MTI	26359764
MIRT733162	hsa-miR-129-5p	Homo sapiens	IGF2BP3	Homo sapiens	Luciferase reporter assay//qRT-PCR//Western blot	Functional MTI	26510428
MIRT733163	hsa-miR-129-5p	Homo sapiens	MAPK1	Homo sapiens	Luciferase reporter assay//qRT-PCR//Western blot	Functional MTI	26510428
MIRT733164	hsa-miR-129-5p	Homo sapiens	IGF1	Homo sapiens	Luciferase reporter assay//qRT-PCR//Western blot	Functional MTI	26510428
MIRT733284	hsa-miR-320a	Homo sapiens	VIM	Homo sapiens	GFP reporter assay//qRT-PCR//Western blot	Functional MTI	27448976
MIRT733285	hsa-miR-320a	Homo sapiens	USP14	Homo sapiens	GFP reporter assay//qRT-PCR//Western blot	Functional MTI	27448976
MIRT733310	hsa-miR-375	Homo sapiens	DEPTOR	Homo sapiens	Luciferase reporter assay//qRT-PCR//Western blot	Functional MTI	28262546
MIRT733361	hsa-miR-324-5p	Homo sapiens	MTFR1	Homo sapiens	Luciferase reporter assay	Functional MTI	26633713
MIRT733367	hsa-miR-129-5p	Homo sapiens	MCRS1	Homo sapiens	qRT-PCR//Western blot	Functional MTI	28105223
MIRT733368	hsa-miR-129-5p	Homo sapiens	VIM	Homo sapiens	qRT-PCR//Western blot	Functional MTI	28105223
MIRT733369	hsa-miR-129-5p	Homo sapiens	CDH1	Homo sapiens	qRT-PCR//Western blot	Functional MTI	28105223
MIRT733392	hsa-miR-133b	Homo sapiens	NUP214	Homo sapiens	Immunoblot//Luciferase reporter assay//qRT-PCR	Functional MTI	25743594
MIRT733423	hsa-miR-125a-5p	Homo sapiens	ZBTB7A	Homo sapiens	Flow//GFP reporter assay//Luciferase reporter assay//Microarray//qRT-PCR//Western blot	Functional MTI	26713860
MIRT733447	hsa-miR-320b	Homo sapiens	DLX5	Homo sapiens	Luciferase reporter assay//qRT-PCR//Western blot	Functional MTI	28025541
MIRT733473	hsa-miR-133b	Homo sapiens	PTBP1	Homo sapiens	Luciferase reporter assay//qRT-PCR//Western blot	Functional MTI	26980745
MIRT733473	hsa-miR-133b	Homo sapiens	PTBP1	Homo sapiens	Luciferase reporter assay//qRT-PCR//Western blot	Functional MTI	27696637
MIRT733491	hsa-miR-423-3p	Homo sapiens	TCEAL1	Homo sapiens	Luciferase reporter assay//Western blot	Functional MTI	26402653
MIRT733534	hsa-miR-193a-5p	Homo sapiens	WT1	Homo sapiens	Luciferase reporter assay//Immunofluorescence//Western blot//qRT-PCR	Functional MTI	27821145
MIRT733541	hsa-miR-375	Homo sapiens	MST1R	Homo sapiens	Luciferase reporter assay//qRT-PCR//Western blot	Functional MTI	27689991
MIRT733610	hsa-miR-490-3p	Homo sapiens	TNKS2	Homo sapiens	Luciferase reporter assay//qRT-PCR//Western blot	Functional MTI	27506313
MIRT733660	hsa-miR-330-3p	Homo sapiens	MSI1	Homo sapiens	Luciferase reporter assay//qRT-PCR//Western blot	Functional MTI	27904681
MIRT733708	hsa-miR-129-5p	Homo sapiens	TWIST1	Homo sapiens	Luciferase reporter assay//qRT-PCR//Western blot	Functional MTI	26460733
MIRT733728	hsa-miR-320a	Homo sapiens	ABCG2	Homo sapiens	Luciferase reporter assay//Western blot	Functional MTI	28008607
MIRT733732	hsa-miR-574-3p	Homo sapiens	TGFB1	Homo sapiens	Luciferase reporter assay//qRT-PCR//Western blot	Functional MTI	28042090
MIRT733803	hsa-miR-129-5p	Homo sapiens	BECN1	Homo sapiens	Luciferase reporter assay//qRT-PCR//Western blot	Functional MTI	27186312
MIRT733870	hsa-miR-502-3p	Homo sapiens	SET	Homo sapiens	Flow//Luciferase reporter assay//qRT-PCR//Western blot	Functional MTI	27330307
MIRT733897	hsa-miR-129-5p	Homo sapiens	FNDC3A	Homo sapiens	Luciferase reporter assay//Western blot	Functional MTI	28068630
MIRT733904	hsa-miR-133b	Homo sapiens	PPP2R2D	Homo sapiens	Luciferase reporter assay//Quantitative proteomic approach	Functional MTI	27074866
MIRT733921	hsa-miR-127-3p	Homo sapiens	MGMT	Homo sapiens	Microarray//qRT-PCR//Western blot	Functional MTI	27057640
MIRT733943	hsa-miR-324-5p	Homo sapiens	ETS1	Homo sapiens	ELISA//Luciferase reporter assay//qRT-PCR//Western blot	Functional MTI	26177288
MIRT733944	hsa-miR-324-5p	Homo sapiens	SP1	Homo sapiens	ELISA//Luciferase reporter assay//qRT-PCR//Western blot	Functional MTI	26177288
MIRT733952	hsa-miR-125a-5p	Homo sapiens	HDAC4	Homo sapiens	Immunohistochemistry//Luciferase reporter assay//Western blot	Functional MTI	25504437
MIRT733956	hsa-miR-320a	Homo sapiens	CTNNB1	Homo sapiens	qRT-PCR//Western blot	Functional MTI	28105205
MIRT733956	hsa-miR-320a	Homo sapiens	CTNNB1	Homo sapiens	Luciferase reporter assay//qRT-PCR//Western blot	Functional MTI	28356931
MIRT734025	hsa-miR-574-3p	Homo sapiens	CLTC	Homo sapiens	Luciferase reporter assay//qRT-PCR//Western blot	Functional MTI	25560734
MIRT734057	hsa-miR-193a-5p	Homo sapiens	PIK3R3	Homo sapiens	Luciferase reporter assay//qRT-PCR//Western blot	Functional MTI	24469061
MIRT734058	hsa-miR-193a-5p	Homo sapiens	MTOR	Homo sapiens	Luciferase reporter assay//qRT-PCR//Western blot	Functional MTI	24469061
MIRT734091	hsa-miR-339-5p	Homo sapiens	MDM2	Homo sapiens	Luciferase reporter assay	Functional MTI	24882579
MIRT734093	hsa-miR-375	Homo sapiens	STAT3	Homo sapiens	Western blot	Functional MTI	28186962
MIRT734094	hsa-miR-375	Homo sapiens	MAPK3	Homo sapiens	Western blot	Functional MTI	28186962
MIRT734110	hsa-miR-423-3p	Homo sapiens	BCL2L11	Homo sapiens	Immunohistochemistry//Luciferase reporter assay//qRT-PCR//Western blot	Functional MTI	28254439
MIRT734111	hsa-miR-484	Homo sapiens	ZEB1	Homo sapiens	GFP reporter assay//Western blot	Functional MTI	28286418
MIRT734134	hsa-miR-320a	Homo sapiens	CRKL	Homo sapiens	Luciferase reporter assay//qRT-PCR//Western blot	Functional MTI	28255248
MIRT734187	hsa-miR-320a	Homo sapiens	ESRRG	Homo sapiens	Luciferase reporter assay//Western blot	Functional MTI	25736597
MIRT734286	hsa-miR-139-5p	Homo sapiens	PDE4D	Homo sapiens	Immunoblot//Luciferase reporter assay//qRT-PCR	Functional MTI	27383270
MIRT734301	hsa-miR-125a-5p	Homo sapiens	PIK3CG	Homo sapiens	qRT-PCR//Western blot	Functional MTI	26622553
MIRT734302	hsa-miR-125a-5p	Homo sapiens	AKT1	Homo sapiens	qRT-PCR//Western blot	Functional MTI	26622553
MIRT734303	hsa-miR-125a-5p	Homo sapiens	MTOR	Homo sapiens	qRT-PCR//Western blot	Functional MTI	26622553
MIRT734322	hsa-miR-129-5p	Homo sapiens	COL1A1	Homo sapiens	Luciferase reporter assay//qRT-PCR//Western blot	Functional MTI	28482162
MIRT734356	hsa-miR-486-5p	Homo sapiens	FOXO1	Homo sapiens	Luciferase reporter assay//Western blot	Functional MTI	25515961
MIRT734357	hsa-miR-486-5p	Homo sapiens	PTEN	Homo sapiens	Luciferase reporter assay//Western blot	Functional MTI	25515961
MIRT734357	hsa-miR-486-5p	Homo sapiens	PTEN	Homo sapiens	Luciferase reporter assay//Next Generation Sequencing (NGS)//qRT-PCR//Western blot	Functional MTI	27650731
MIRT734358	hsa-miR-139-5p	Homo sapiens	WNT1	Homo sapiens	Luciferase reporter assay//Western blot	Functional MTI	25529604
MIRT734372	hsa-miR-125a-5p	Homo sapiens	MEG3	Homo sapiens	ELISA//Luciferase reporter assay//qRT-PCR//Western blot	Functional MTI	27522004
MIRT734428	hsa-miR-193a-5p	Homo sapiens	ING5	Homo sapiens	Luciferase reporter assay//qRT-PCR//Western blot	Functional MTI	25991669
MIRT734465	hsa-miR-127-3p	Homo sapiens	XRCC3	Homo sapiens	Luciferase reporter assay//qRT-PCR//Western blot	Functional MTI	27590853
MIRT734474	hsa-miR-342-3p	Homo sapiens	MTDH	Homo sapiens	Luciferase reporter assay//Western blot	Functional MTI	28112756
MIRT734542	hsa-miR-133b	Homo sapiens	SGK1	Homo sapiens	Luciferase reporter assay//qRT-PCR//Western blot	Functional MTI	26840046
MIRT734543	hsa-miR-133b	Homo sapiens	FOXC1	Homo sapiens	qRT-PCR//Western blot//EGFR reporter assay////Luciferase reporter assay	Functional MTI	27050992
MIRT734577	hsa-miR-320a	Homo sapiens	PICSAR	Homo sapiens	Luciferase reporter assay	Functional MTI	26539909
MIRT734604	hsa-miR-28-3p	Homo sapiens	STAT5B	Homo sapiens	Luciferase reporter assay	Functional MTI	24681953
MIRT734605	hsa-miR-28-3p	Homo sapiens	TP53	Homo sapiens	Luciferase reporter assay	Functional MTI	24681953
MIRT734610	hsa-miR-320a	Homo sapiens	RAB11A	Homo sapiens	Luciferase reporter assay//qRT-PCR//Western blot	Functional MTI	26609479
MIRT734648	hsa-miR-125a-5p	Homo sapiens	HDAC5	Homo sapiens	Flow//Immunoblot//Luciferase reporter assay//qRT-PCR//Western blot	Functional MTI	25531695
MIRT734661	hsa-miR-139-5p	Homo sapiens	MMP11	Homo sapiens	Luciferase reporter assay//Microarray//qRT-PCR//Western blot	Functional MTI	27355528
MIRT734669	hsa-miR-296-5p	Homo sapiens	FGFR1	Homo sapiens	Immunohistochemistry//Luciferase reporter assay//qRT-PCR//Western blot	Functional MTI	27714806
MIRT734695	hsa-miR-342-3p	Homo sapiens	BIRC6	Homo sapiens	Luciferase reporter assay//Western blot	Functional MTI	26919240
MIRT734728	hsa-miR-125a-5p	Homo sapiens	RAF1	Homo sapiens	Luciferase reporter assay//qRT-PCR//Western blot	Functional MTI	27982429
MIRT734732	hsa-miR-342-3p	Homo sapiens	E2F1	Homo sapiens	Luciferase reporter assay//qRT-PCR//Western blot	Functional MTI	26483346
MIRT734749	hsa-miR-486-5p	Homo sapiens	CLDN10	Homo sapiens	Luciferase reporter assay//qRT-PCR//Western blot	Functional MTI	25655186
MIRT734757	hsa-miR-125a-5p	Homo sapiens	E2F3	Homo sapiens	Flow//Luciferase reporter assay//qRT-PCR//Western blot	Functional MTI	25733534
MIRT734781	hsa-miR-133b	Homo sapiens	GSTP1	Homo sapiens	Luciferase reporter assay	Functional MTI	26396496
MIRT734839	hsa-miR-127-3p	Homo sapiens	BAG5	Homo sapiens	Luciferase reporter assay//qRT-PCR	Functional MTI	27571744
MIRT734845	hsa-miR-375	Homo sapiens	MALAT1	Homo sapiens	Luciferase reporter assay//qRT-PCR	Functional MTI	27658300
MIRT734865	hsa-miR-320a	Homo sapiens	NOD2	Homo sapiens	Luciferase reporter assay//qRT-PCR//Western blot	Functional MTI	26752466
MIRT734866	hsa-miR-320b	Homo sapiens	NOD2	Homo sapiens	Luciferase reporter assay//qRT-PCR//Western blot	Functional MTI	26752466
MIRT734868	hsa-miR-320a	Homo sapiens	FH	Homo sapiens	Luciferase reporter assay//qRT-PCR//Western blot	Functional MTI	26753959
MIRT734869	hsa-miR-193a-5p	Homo sapiens	TFAP2A	Homo sapiens	Luciferase reporter assay//Western blot	Functional MTI	27698912
MIRT734906	hsa-miR-296-5p	Homo sapiens	VEGFA	Homo sapiens	qRT-PCR//Western blot	Functional MTI	26500043
MIRT734907	hsa-miR-296-5p	Homo sapiens	KDR	Homo sapiens	qRT-PCR//Western blot	Functional MTI	26500043
MIRT734908	hsa-miR-296-5p	Homo sapiens	DLL4	Homo sapiens	qRT-PCR//Western blot	Functional MTI	26500043
MIRT734909	hsa-miR-296-5p	Homo sapiens	NOTCH1	Homo sapiens	qRT-PCR//Western blot	Functional MTI	26500043
MIRT734976	hsa-miR-296-5p	Homo sapiens	CASP8	Homo sapiens	Immunoprecipitaion//Luciferase reporter assay//qRT-PCR	Functional MTI	27927008
MIRT734977	hsa-miR-296-5p	Homo sapiens	NGFR	Homo sapiens	Immunoprecipitaion//Luciferase reporter assay//qRT-PCR	Functional MTI	27927008
MIRT734988	hsa-miR-125a-5p	Homo sapiens	JAK2	Homo sapiens	qRT-PCR//Western blot	Functional MTI	26011312
MIRT735092	hsa-miR-320a	Homo sapiens	AR	Homo sapiens	Luciferase reporter assay	Functional MTI	27216188
MIRT735098	hsa-miR-125a-5p	Homo sapiens	SMAD2	Homo sapiens	Luciferase reporter assay	Functional MTI	27388239
MIRT735108	hsa-miR-320a	Homo sapiens	HMGB1	Homo sapiens	Luciferase reporter assay//qRT-PCR//Western blot	Functional MTI	28317284
MIRT735132	hsa-miR-423-3p	Homo sapiens	PA2G4	Homo sapiens	Luciferase reporter assay//qRT-PCR//Western blot	Functional MTI	25926693
MIRT735148	hsa-miR-375	Homo sapiens	RUNX3	Homo sapiens	Luciferase reporter assay//qRT-PCR//Western blot	Functional MTI	26170936
MIRT735170	hsa-miR-330-3p	Homo sapiens	PDCD4	Homo sapiens	Luciferase reporter assay//Microarray//qRT-PCR//Western blot	Functional MTI	26045986
MIRT735188	hsa-miR-375	Homo sapiens	MYCN	Homo sapiens	Luciferase reporter assay//qRT-PCR//Western blot	Functional MTI	25864587
MIRT735192	hsa-miR-326	Homo sapiens	BCL2L1	Homo sapiens	Luciferase reporter assay//qRT-PCR//Western blot	Functional MTI	25875481
MIRT735258	hsa-miR-125a-5p	Homo sapiens	ARID3A	Homo sapiens	Luciferase reporter assay//qRT-PCR//Western blot	Functional MTI	28408353
MIRT735288	hsa-miR-330-3p	Homo sapiens	EGR2	Homo sapiens	Luciferase reporter assay//qRT-PCR//Western blot	Functional MTI	25935837
MIRT735338	hsa-miR-486-5p	Homo sapiens	PIK3R1	Homo sapiens	Luciferase reporter assay//Next Generation Sequencing (NGS)//qRT-PCR//Western blot	Functional MTI	25475121
MIRT735376	hsa-miR-133b	Homo sapiens	MMP14	Homo sapiens	ELISA//Luciferase reporter assay//qRT-PCR//Western blot	Functional MTI	26722242
MIRT735416	hsa-miR-320a	Homo sapiens	FAS	Homo sapiens	Luciferase reporter assay//qRT-PCR//Western blot	Functional MTI	27277534
MIRT735418	hsa-miR-375	Homo sapiens	KLF4	Homo sapiens	qRT-PCR//Western blot	Functional MTI	27279635
MIRT735460	hsa-miR-326	Homo sapiens	SP1	Homo sapiens	Luciferase reporter assay//qRT-PCR//Western blot	Functional MTI	27460077
MIRT735487	hsa-miR-320a	Homo sapiens	CDK6	Homo sapiens	Luciferase reporter assay//Microarray//qRT-PCR//Western blot	Functional MTI	27559432
MIRT735518	hsa-miR-133b	Homo sapiens	GLI3	Homo sapiens	Microarray//qRT-PCR//Western blot	Functional MTI	26755652
