# Supplementary material for: Identification of colorectal cancer associated biomarkers: an integrated analysis of miRNA expression
Source: Aging (Albany NY). 2021 Sep 21;13(18):21991–2029. doi: 10.18632/aging.203556 (PMC8507258; doi:10.18632/aging.203556)
Supplement: Supplementary Table 2 [file aging-13-203556-s003.xlsx]

## Sheet: Supplementary Table II
Supplementary Table 2. List of microRNA-target interactions (MTIs) experimentally validated for the 26 downregulated miRNAs comprising only the 172 genes reported to be involved in colorectal carcinoma development obtained from the Colorectal Cancer Gene Database (CoReCG).
miRTarBase.ID	miRNA	Species	Target Gene	Species	Experiments	Support Type	References PMID
MIRT000055	hsa-miR-375	Homo sapiens	PDK1	Homo sapiens	Immunohistochemistry//Luciferase reporter assay//qRT-PCR//Western blot	Functional MTI	21533613
MIRT000055	hsa-miR-375	Homo sapiens	PDK1	Homo sapiens	Western blot	Functional MTI	20215506
MIRT000055	hsa-miR-375	Homo sapiens	PDK1	Homo sapiens	Luciferase reporter assay//Western blot	Functional MTI	24137444
MIRT000055	hsa-miR-375	Homo sapiens	PDK1	Homo sapiens	Luciferase reporter assay	Functional MTI	24481267
MIRT000082	hsa-miR-326	Homo sapiens	GLI1	Homo sapiens	Luciferase reporter assay	Functional MTI	18756266
MIRT000526	hsa-miR-326	Homo sapiens	SMO	Homo sapiens	Luciferase reporter assay//Western blot	Functional MTI	20216554
MIRT000526	hsa-miR-326	Homo sapiens	SMO	Homo sapiens	Luciferase reporter assay//Western blot	Functional MTI	18756266
MIRT000526	hsa-miR-326	Homo sapiens	SMO	Homo sapiens	Western blot	Functional MTI	23341351
MIRT000526	hsa-miR-326	Homo sapiens	SMO	Homo sapiens	Immunofluorescence//qRT-PCR//Luciferase reporter assay//Western blot	Functional MTI	25173582
MIRT000527	hsa-miR-324-5p	Homo sapiens	SMO	Homo sapiens	Luciferase reporter assay//Western blot	Functional MTI	20216554
MIRT000527	hsa-miR-324-5p	Homo sapiens	SMO	Homo sapiens	Luciferase reporter assay//Western blot	Functional MTI	18756266
MIRT000530	hsa-miR-324-5p	Homo sapiens	GLI1	Homo sapiens	Luciferase reporter assay//Western blot	Functional MTI	20216554
MIRT000530	hsa-miR-324-5p	Homo sapiens	GLI1	Homo sapiens	Luciferase reporter assay	Functional MTI	18756266
MIRT000589	hsa-miR-423-3p	Homo sapiens	CDKN1A	Homo sapiens	qRT-PCR//Luciferase reporter assay//Western blot	Functional MTI	20190813
MIRT000593	hsa-miR-299-5p	Homo sapiens	CDKN1A	Homo sapiens	qRT-PCR//Luciferase reporter assay//Western blot	Functional MTI	20190813
MIRT000593	hsa-miR-299-5p	Homo sapiens	CDKN1A	Homo sapiens	Luciferase reporter assay//Western blot	Functional MTI	27347210
MIRT000602	hsa-miR-125a-5p	Homo sapiens	CDKN1A	Homo sapiens	qRT-PCR//Luciferase reporter assay//Western blot	Functional MTI	20190813
MIRT000718	hsa-miR-330-3p	Homo sapiens	E2F1	Homo sapiens	Luciferase reporter assay//Western blot	Functional MTI	19597470
MIRT001749	hsa-miR-375	Homo sapiens	JAK2	Homo sapiens	Luciferase reporter assay//Western blot//Reporter assay;Western blot	Functional MTI	20548334
MIRT001749	hsa-miR-375	Homo sapiens	JAK2	Homo sapiens	Reporter assay	Functional MTI	15806104
MIRT001749	hsa-miR-375	Homo sapiens	JAK2	Homo sapiens	Immunohistochemistry//Luciferase reporter assay//qRT-PCR//Western blot	Functional MTI	24718681
MIRT001749	hsa-miR-375	Homo sapiens	JAK2	Homo sapiens	Luciferase reporter assay//qRT-PCR	Functional MTI	25055044
MIRT001749	hsa-miR-375	Homo sapiens	JAK2	Homo sapiens	Western blot	Functional MTI	28186962
MIRT001749	hsa-miR-375	Homo sapiens	JAK2	Homo sapiens	Luciferase reporter assay	Functional MTI	28006751
MIRT001750	hsa-miR-375	Homo sapiens	ADIPOR2	Homo sapiens	Reporter assay	Functional MTI	15806104
MIRT001815	hsa-miR-133b	Homo sapiens	PKM	Homo sapiens	Western blot	Functional MTI	27073574
MIRT001815	hsa-miR-133b	Homo sapiens	PKM	Homo sapiens	qRT-PCR//Western blot	Functional MTI	28641694
MIRT001953	hsa-miR-129-5p	Homo sapiens	CAMTA1	Homo sapiens	Luciferase reporter assay	Functional MTI	18189265
MIRT003260	hsa-miR-133b	Homo sapiens	MCL1	Homo sapiens	Western blot//Luciferase reporter assay	Functional MTI	19654003
MIRT003260	hsa-miR-133b	Homo sapiens	MCL1	Homo sapiens	Luciferase reporter assay//Western blot	Functional MTI	20056941
MIRT003260	hsa-miR-133b	Homo sapiens	MCL1	Homo sapiens	Western blot	Functional MTI	24391788
MIRT003260	hsa-miR-133b	Homo sapiens	MCL1	Homo sapiens	ChIP-seq//Luciferase reporter assay//qRT-PCR//Western blot	Functional MTI	26276722
MIRT003744	hsa-miR-320a	Homo sapiens	TFRC	Homo sapiens	Luciferase reporter assay	Functional MTI	18523662
MIRT003744	hsa-miR-320a	Homo sapiens	TFRC	Homo sapiens	Luciferase reporter assay	Functional MTI	19164563
MIRT003744	hsa-miR-320a	Homo sapiens	TFRC	Homo sapiens	Luciferase reporter assay//Northern blot//flow	Functional MTI	19135902
MIRT003755	hsa-miR-125a-5p	Homo sapiens	NTRK3	Homo sapiens	Luciferase reporter assay//Western blot	Functional MTI	17483472
MIRT003755	hsa-miR-125a-5p	Homo sapiens	NTRK3	Homo sapiens	Luciferase reporter assay	Functional MTI	19179615
MIRT003755	hsa-miR-125a-5p	Homo sapiens	NTRK3	Homo sapiens	Luciferase reporter assay	Functional MTI	18973228
MIRT004043	hsa-miR-129-5p	Homo sapiens	SOX4	Homo sapiens	Luciferase reporter assay//qRT-PCR//Western blot	Functional MTI	19887623
MIRT004043	hsa-miR-129-5p	Homo sapiens	SOX4	Homo sapiens	Immunohistochemistry//Luciferase reporter assay//qRT-PCR//Western blot	Functional MTI	20331975
MIRT004071	hsa-miR-125a-5p	Homo sapiens	TP53	Homo sapiens	Luciferase reporter assay//Northern blot//qRT-PCR//Western blot	Functional MTI	19818772
MIRT004071	hsa-miR-125a-5p	Homo sapiens	TP53	Homo sapiens	qRT-PCR//Western blot	Functional MTI	26017674
MIRT004279	hsa-miR-127-3p	Homo sapiens	PRDM1	Homo sapiens	qRT-PCR//Luciferase reporter assay//Western blot	Functional MTI	19530237
MIRT004424	hsa-miR-326	Homo sapiens	NOTCH1	Homo sapiens	Western blot//Luciferase reporter assay	Functional MTI	19955368
MIRT004425	hsa-miR-326	Homo sapiens	NOTCH2	Homo sapiens	Western blot//Luciferase reporter assay	Functional MTI	19955368
MIRT004440	hsa-miR-320a	Homo sapiens	MCL1	Homo sapiens	Luciferase reporter assay	Functional MTI	19096009
MIRT004440	hsa-miR-320a	Homo sapiens	MCL1	Homo sapiens	Flow//Immunohistochemistry//Microarray//Northern blot//qRT-PCR//Western blot	Functional MTI	24136787
MIRT004445	hsa-miR-125a-5p	Homo sapiens	VEGFA	Homo sapiens	ELISA//Luciferase reporter assay//qRT-PCR//Western blot	Functional MTI	26398444
MIRT004460	hsa-miR-133b	Homo sapiens	IGF1R	Homo sapiens	Luciferase reporter assay	Functional MTI	19695767
MIRT004460	hsa-miR-133b	Homo sapiens	IGF1R	Homo sapiens	Western blot	Functional MTI	24391788
MIRT004463	hsa-miR-127-3p	Homo sapiens	BCL6	Homo sapiens	Luciferase reporter assay	Functional MTI	17581274
MIRT004463	hsa-miR-127-3p	Homo sapiens	BCL6	Homo sapiens	Luciferase reporter assay//Microarray//Northern blot//qRT-PCR//Western blot	Functional MTI	16766263
MIRT004463	hsa-miR-127-3p	Homo sapiens	BCL6	Homo sapiens	Immunoblot//Luciferase reporter assay//qRT-PCR	Functional MTI	24282530
MIRT004565	hsa-miR-299-5p	Homo sapiens	SPP1	Homo sapiens	immunoblot//qRT-PCR//Luciferase reporter assay//Microarray	Functional MTI	19538464
MIRT004684	hsa-miR-324-3p	Homo sapiens	DVL2	Homo sapiens	Luciferase reporter assay	Functional MTI	19478946
MIRT004747	hsa-miR-326	Homo sapiens	MSH3	Homo sapiens	Luciferase reporter assay//Microarray//qRT-PCR//Western blot	Functional MTI	19883630
MIRT005117	hsa-miR-125a-5p	Homo sapiens	ERBB3	Homo sapiens	Luciferase reporter assay//Northern blot//qRT-PCR//Western blot	Functional MTI	17110380
MIRT005117	hsa-miR-125a-5p	Homo sapiens	ERBB3	Homo sapiens	Luciferase reporter assay//Microarray//Western blot	Functional MTI	20864407
MIRT005117	hsa-miR-125a-5p	Homo sapiens	ERBB3	Homo sapiens	Western blot//qRT-PCR	Functional MTI	23519125
MIRT005118	hsa-miR-125a-5p	Homo sapiens	ERBB2	Homo sapiens	Luciferase reporter assay//Northern blot//qRT-PCR//Western blot	Functional MTI	17110380
MIRT005118	hsa-miR-125a-5p	Homo sapiens	ERBB2	Homo sapiens	Luciferase reporter assay	Functional MTI	21220473
MIRT005118	hsa-miR-125a-5p	Homo sapiens	ERBB2	Homo sapiens	Western blot//qRT-PCR	Functional MTI	23519125
MIRT005118	hsa-miR-125a-5p	Homo sapiens	ERBB2	Homo sapiens	Luciferase reporter assay//qRT-PCR//Western blot	Functional MTI	25833836
MIRT005350	hsa-miR-125a-5p	Homo sapiens	BAK1	Homo sapiens	Flow//Luciferase reporter assay//qRT-PCR//Western blot	Functional MTI	20616003
MIRT005412	hsa-miR-129-5p	Homo sapiens	NOTCH1	Homo sapiens	Luciferase reporter assay//Microarray	Functional MTI	17150773
MIRT005412	hsa-miR-129-5p	Homo sapiens	NOTCH1	Homo sapiens	Luciferase reporter assay//qRT-PCR	Functional MTI	28410211
MIRT005520	hsa-miR-326	Homo sapiens	PKM	Homo sapiens	Luciferase reporter assay//qRT-PCR//Western blot	Functional MTI	20667897
MIRT005603	hsa-miR-193a-5p	Homo sapiens	TP73	Homo sapiens	Immunoblot//Luciferase reporter assay//qRT-PCR//Western blot	Functional MTI	21293058
MIRT005805	hsa-miR-331-3p	Homo sapiens	ERBB2	Homo sapiens	Luciferase reporter assay//Microarray//Western blot	Functional MTI	20864407
MIRT005805	hsa-miR-331-3p	Homo sapiens	ERBB2	Homo sapiens	Flow//Immunohistochemistry//Luciferase reporter assay//qRT-PCR//Western blot	Functional MTI	24775712
MIRT005805	hsa-miR-331-3p	Homo sapiens	ERBB2	Homo sapiens	Luciferase reporter assay	Functional MTI	24148764
MIRT005805	hsa-miR-331-3p	Homo sapiens	ERBB2	Homo sapiens	Luciferase reporter assay//Western blot	Functional MTI	26718987
MIRT005882	hsa-miR-342-3p	Homo sapiens	BMP7	Homo sapiens	Luciferase reporter assay//Northern blot//qRT-PCR	Functional MTI	21172025
MIRT005929	hsa-miR-339-5p	Homo sapiens	BCL6	Homo sapiens	Immunohistochemistry//Luciferase reporter assay//Western blot	Functional MTI	24917186
MIRT005965	hsa-miR-330-3p	Homo sapiens	CDC42	Homo sapiens	Immunohistochemistry//Luciferase reporter assay//Western blot	Functional MTI	21149267
MIRT005965	hsa-miR-330-3p	Homo sapiens	CDC42	Homo sapiens	Luciferase reporter assay//qRT-PCR//Western blot	Functional MTI	23337504
MIRT005968	hsa-miR-330-3p	Homo sapiens	CD44	Homo sapiens	Immunohistochemistry//Luciferase reporter assay//Western blot	Functional MTI	21149267
MIRT006154	hsa-miR-375	Homo sapiens	YAP1	Homo sapiens	Luciferase reporter assay//Microarray//qRT-PCR	Functional MTI	21856745
MIRT006154	hsa-miR-375	Homo sapiens	YAP1	Homo sapiens	Luciferase reporter assay//Western blot//qRT-PCR	Functional MTI	24892549
MIRT006154	hsa-miR-375	Homo sapiens	YAP1	Homo sapiens	Flow//Immunohistochemistry//qRT-PCR//Western blot	Functional MTI	27832783
MIRT006207	hsa-miR-375	Homo sapiens	MTDH	Homo sapiens	Immunofluorescence//Luciferase reporter assay//qRT-PCR//Western blot	Functional MTI	22508479
MIRT006207	hsa-miR-375	Homo sapiens	MTDH	Homo sapiens	Microarray//qRT-PCR//Western blot	Functional MTI	22752059
MIRT006207	hsa-miR-375	Homo sapiens	MTDH	Homo sapiens	Luciferase reporter assay//Microarray//qRT-PCR//Western blot	Functional MTI	25944465
MIRT006364	hsa-miR-331-3p	Homo sapiens	FHIT	Homo sapiens	Luciferase reporter assay	Functional MTI	21711110
MIRT006443	hsa-miR-342-3p	Homo sapiens	DNMT1	Homo sapiens	Luciferase reporter assay//qRT-PCR//Western blot	Functional MTI	21565830
MIRT006443	hsa-miR-342-3p	Homo sapiens	DNMT1	Homo sapiens	Luciferase reporter assay//Microarray//qRT-PCR//Western blot	Functional MTI	27302063
MIRT006471	hsa-miR-125a-5p	Homo sapiens	TNFAIP3	Homo sapiens	qRT-PCR//Western blot	Functional MTI	22550173
MIRT006471	hsa-miR-125a-5p	Homo sapiens	TNFAIP3	Homo sapiens	Luciferase reporter assay//qRT-PCR//Western blot	Functional MTI	26758190
MIRT006497	hsa-miR-320a	Homo sapiens	AQP1	Homo sapiens	Luciferase reporter assay	Functional MTI	20628061
MIRT006506	hsa-miR-331-3p	Homo sapiens	E2F1	Homo sapiens	Luciferase reporter assay//Western blot	Functional MTI	20510161
MIRT006554	hsa-miR-133b	Homo sapiens	FSCN1	Homo sapiens	Luciferase reporter assay//qRT-PCR//Western blot//Reporter assay//Reporter assay;Western blot;qRT-PCR	Functional MTI	21351259
MIRT006554	hsa-miR-133b	Homo sapiens	FSCN1	Homo sapiens	Luciferase reporter assay//qRT-PCR//Western blot	Functional MTI	25433493
MIRT006554	hsa-miR-133b	Homo sapiens	FSCN1	Homo sapiens	Luciferase reporter assay//Western blot	Functional MTI	27900045
MIRT006809	hsa-miR-125a-5p	Homo sapiens	SMAD4	Homo sapiens	Luciferase reporter assay//Western blot	Functional MTI	22357933
MIRT006905	hsa-miR-125a-5p	Homo sapiens	MMP11	Homo sapiens	Immunohistochemistry//Luciferase reporter assay//qRT-PCR//Western blot	Functional MTI	22768249
MIRT006942	hsa-miR-139-5p	Homo sapiens	IGF1R	Homo sapiens	Luciferase reporter assay	Functional MTI	22580051
MIRT006942	hsa-miR-139-5p	Homo sapiens	IGF1R	Homo sapiens	Luciferase reporter assay//Western blot//qRT-PCR	Functional MTI	24942287
MIRT006942	hsa-miR-139-5p	Homo sapiens	IGF1R	Homo sapiens	Luciferase reporter assay//Western blot	Functional MTI	26097570
MIRT006944	hsa-miR-125a-5p	Homo sapiens	HK2	Homo sapiens	Luciferase reporter assay	Functional MTI	22593586
MIRT006976	hsa-miR-139-5p	Homo sapiens	FOS	Homo sapiens	qRT-PCR//Western blot	Functional MTI	23001723
MIRT006976	hsa-miR-139-5p	Homo sapiens	FOS	Homo sapiens	qRT-PCR//Western blot	Functional MTI	27668889
MIRT007069	hsa-miR-133b	Homo sapiens	EGFR	Homo sapiens	Flow//In situ hybridization//Luciferase reporter assay//qRT-PCR//Western blot	Functional MTI	22883469
MIRT007069	hsa-miR-133b	Homo sapiens	EGFR	Homo sapiens	Luciferase reporter assay//Western blot	Functional MTI	22407299
MIRT007069	hsa-miR-133b	Homo sapiens	EGFR	Homo sapiens	Luciferase reporter assay//Western blot	Functional MTI	26617770
MIRT007093	hsa-miR-320a	Homo sapiens	MAPK1	Homo sapiens	Luciferase reporter assay	Functional MTI	23196978
MIRT007113	hsa-miR-133b	Homo sapiens	FGFR1	Homo sapiens	Luciferase reporter assay//Western blot//Immunohistochemistry//qRT-PCR	Functional MTI	23296701
MIRT007200	hsa-miR-375	Homo sapiens	MAP3K8	Homo sapiens	Luciferase reporter assay	Functional MTI	23430746
MIRT007200	hsa-miR-375	Homo sapiens	MAP3K8	Homo sapiens	Western blot	Functional MTI	28186962
MIRT007382	hsa-miR-133b	Homo sapiens	PRDM16	Homo sapiens	Luciferase reporter assay	Functional MTI	23395168
MIRT016691	hsa-miR-133b	Homo sapiens	MET	Homo sapiens	Reporter assay	Functional MTI	20505319
MIRT016691	hsa-miR-133b	Homo sapiens	MET	Homo sapiens	Western blot	Functional MTI	24391788
MIRT016692	hsa-miR-133b	Homo sapiens	ERG	Homo sapiens	Reporter assay	Functional MTI	17344217
MIRT019235	hsa-miR-331-3p	Homo sapiens	PHLPP1	Homo sapiens	Luciferase reporter assay	Functional MTI	24825302
MIRT019236	hsa-miR-331-3p	Homo sapiens	NRP2	Homo sapiens	Luciferase reporter assay//Western blot	Functional MTI	24142150
MIRT019236	hsa-miR-331-3p	Homo sapiens	NRP2	Homo sapiens	Luciferase reporter assay//qRT-PCR//Western blot	Functional MTI	27548144
MIRT019530	hsa-miR-326	Homo sapiens	CD9	Homo sapiens	Western blot;qRT-PCR	Functional MTI	19883630
MIRT019875	hsa-miR-375	Homo sapiens	LDHB	Homo sapiens	Immunohistochemistry//Luciferase reporter assay//Microarray//QRTPCR	Functional MTI	23497265
MIRT019875	hsa-miR-375	Homo sapiens	LDHB	Homo sapiens	Microarray//qRT-PCR//Western blot	Functional MTI	22752059
MIRT019977	hsa-miR-375	Homo sapiens	RHOA	Homo sapiens	Western blot;qRT-PCR;Microarray	Functional MTI	20584986
MIRT021307	hsa-miR-125a-5p	Homo sapiens	EIF4EBP1	Homo sapiens	Luciferase reporter assay//qRT-PCR//Western blot	Functional MTI	26646586
MIRT036232	hsa-miR-320b	Homo sapiens	MYC	Homo sapiens	Luciferase reporter assay//qRT-PCR//Western blot	Functional MTI	26487644
MIRT042141	hsa-miR-484	Homo sapiens	SMAD2	Homo sapiens	GFP reporter assay//Western blot	Functional MTI	28286418
MIRT044504	hsa-miR-320a	Homo sapiens	IGF1R	Homo sapiens	Luciferase reporter assay	Functional MTI	24161401
MIRT044759	hsa-miR-320a	Homo sapiens	MYC	Homo sapiens	Luciferase reporter assay//qRT-PCR//Western blot	Functional MTI	28243124
MIRT053049	hsa-miR-139-5p	Homo sapiens	MCL1	Homo sapiens	Immunohistochemistry//Luciferase reporter assay//qRT-PCR//Western blot	Functional MTI	23557151
MIRT053049	hsa-miR-139-5p	Homo sapiens	MCL1	Homo sapiens	Immunohistochemistry//Luciferase reporter assay//qRT-PCR//Western blot	Functional MTI	23551751
MIRT053120	hsa-miR-127-3p	Homo sapiens	MMP13	Homo sapiens	Luciferase reporter assay	Functional MTI	23762330
MIRT053177	hsa-miR-133b	Homo sapiens	CDC42	Homo sapiens	Immunoblot//Luciferase reporter assay//Microarray	Functional MTI	22179829
MIRT053177	hsa-miR-133b	Homo sapiens	CDC42	Homo sapiens	Luciferase reporter assay//qRT-PCR//Western blot	Functional MTI	25152372
MIRT053178	hsa-miR-133b	Homo sapiens	RHOA	Homo sapiens	Immunoblot//Luciferase reporter assay//Microarray//qRT-PCR//Western blot	Functional MTI	22179829
MIRT053473	hsa-miR-486-5p	Homo sapiens	OLFM4	Homo sapiens	In situ hybridization//Luciferase reporter assay//Microarray//qRT-PCR//Western blot	Functional MTI	21415212
MIRT053533	hsa-miR-375	Homo sapiens	TP53	Homo sapiens	Flow//Luciferase reporter assay//qRT-PCR//Western blot	Functional MTI	23835407
MIRT053575	hsa-miR-129-5p	Homo sapiens	CDK6	Homo sapiens	qRT-PCR//Western blot	Functional MTI	24055727
MIRT053596	hsa-miR-133b	Homo sapiens	GLI1	Homo sapiens	Luciferase reporter assay//qRT-PCR//Western blot	Functional MTI	24443799
MIRT053780	hsa-miR-375	Homo sapiens	ERBB2	Homo sapiens	Luciferase reporter assay//qRT-PCR//Western blot	Functional MTI	24926380
MIRT053780	hsa-miR-375	Homo sapiens	ERBB2	Homo sapiens	Flow//qRT-PCR//Western blot	Functional MTI	26893657
MIRT053792	hsa-miR-125a-5p	Homo sapiens	LIFR	Homo sapiens	Luciferase reporter assay//Western blot	Functional MTI	21788734
MIRT053792	hsa-miR-125a-5p	Homo sapiens	LIFR	Homo sapiens	Luciferase reporter assay//Western blot	Functional MTI	25962054
MIRT054152	hsa-miR-129-5p	Homo sapiens	ABCB1	Homo sapiens	Immunohistochemistry//Luciferase reporter assay//Microarray//qRT-PCR//Western blot	Functional MTI	25344911
MIRT054152	hsa-miR-129-5p	Homo sapiens	ABCB1	Homo sapiens	Luciferase reporter assay//qRT-PCR//Western blot	Functional MTI	28012924
MIRT054157	hsa-miR-296-5p	Homo sapiens	CDX1	Homo sapiens	Immunohistochemistry//Luciferase reporter assay//Microarray//qRT-PCR//Western blot	Functional MTI	23353818
MIRT054160	hsa-miR-139-5p	Homo sapiens	CXCR4	Homo sapiens	ChIP-seq//Flow//Immunohistochemistry//In situ hybridization//Luciferase reporter assay//Microarray//Northern blot//qRT-PCR//Western blot	Functional MTI	21925125
MIRT054160	hsa-miR-139-5p	Homo sapiens	CXCR4	Homo sapiens	Immunohistochemistry//In situ hybridization//Luciferase reporter assay//qRT-PCR//Western blot	Functional MTI	24318902
MIRT054242	hsa-miR-574-3p	Homo sapiens	RAC1	Homo sapiens	Luciferase reporter assay//Microarray//qRT-PCR//Western blot	Functional MTI	23554959
MIRT054243	hsa-miR-574-3p	Homo sapiens	EGFR	Homo sapiens	Luciferase reporter assay//Microarray//qRT-PCR//Western blot	Functional MTI	23554959
MIRT054244	hsa-miR-574-3p	Homo sapiens	EP300	Homo sapiens	Luciferase reporter assay//Microarray//qRT-PCR//Western blot	Functional MTI	23554959
MIRT054258	hsa-miR-139-5p	Homo sapiens	JUN	Homo sapiens	ChIP-seq//Flow//Luciferase reporter assay//qRT-PCR//Western blot	Functional MTI	25499265
MIRT054351	hsa-miR-574-3p	Homo sapiens	RXRA	Homo sapiens	Luciferase reporter assay//Microarray//qRT-PCR//Western blot	Functional MTI	23626837
MIRT054476	hsa-miR-320a	Homo sapiens	ITGB3	Homo sapiens	Luciferase reporter assay//qRT-PCR//Western blot	Functional MTI	24443232
MIRT054476	hsa-miR-320a	Homo sapiens	ITGB3	Homo sapiens	Immunofluorescence//Luciferase reporter assay//Western blot	Functional MTI	25924850
MIRT054488	hsa-miR-320a	Homo sapiens	GNAI1	Homo sapiens	Luciferase reporter assay//Western blot//Immunohistochemical (IHC) staining	Functional MTI	23691483
MIRT054490	hsa-miR-320d	Homo sapiens	GNAI1	Homo sapiens	Luciferase reporter assay//Western blot//Immunohistochemical (IHC) staining	Functional MTI	23691483
MIRT054558	hsa-miR-375	Homo sapiens	IGF1R	Homo sapiens	Luciferase reporter assay//qRT-PCR//Western blot	Functional MTI	24571711
MIRT054647	hsa-miR-320a	Homo sapiens	RAC1	Homo sapiens	Immunoblot//Immunohistochemistry//Luciferase reporter assay//qRT-PCR	Functional MTI	24265291
MIRT054763	hsa-miR-139-5p	Homo sapiens	NOTCH1	Homo sapiens	Luciferase reporter assay//Wstern blot	Functional MTI	24885920
MIRT054763	hsa-miR-139-5p	Homo sapiens	NOTCH1	Homo sapiens	Luciferase reporter assay//qRT-PCR//Western blot	Functional MTI	27738333
MIRT054763	hsa-miR-139-5p	Homo sapiens	NOTCH1	Homo sapiens	Luciferase reporter assay//qRT-PCR//Western blot	Functional MTI	26299922
MIRT054808	hsa-miR-139-5p	Homo sapiens	ROCK2	Homo sapiens	Luciferase reporter assay//Western blot//qRT-PCR	Functional MTI	24942287
MIRT054827	hsa-miR-133b	Homo sapiens	TAGLN2	Homo sapiens	Immunoflourescence//Luciferase reporter assay//QRTPCR//Western blot	Functional MTI	24959893
MIRT054839	hsa-miR-375	Homo sapiens	PIK3CA	Homo sapiens	Luciferase reporter assay//qRT-PCR//Quantitative proteomic approach//Western blot	Functional MTI	24440701
MIRT054840	hsa-miR-490-3p	Homo sapiens	CCND1	Homo sapiens	Luciferase reporter assay//qRT-PCR//Western blot	Functional MTI	24440705
MIRT054875	hsa-miR-133b	Homo sapiens	AKT1	Homo sapiens	Luciferase reporter assay//qRT-PCR//Western blot	Functional MTI	25414595
MIRT054884	hsa-miR-342-3p	Homo sapiens	ID4	Homo sapiens	Luciferase reporter assay//qRT-PCR//Western blot	Functional MTI	24475217
MIRT054888	hsa-miR-125a-5p	Homo sapiens	EGFR	Homo sapiens	qRT-PCR//Western blot	Functional MTI	24484870
MIRT063471	hsa-miR-127-3p	Homo sapiens	SKI	Homo sapiens	Luciferase reporter assay//qRT-PCR//Western blot	Functional MTI	24517116
MIRT121568	hsa-miR-129-5p	Homo sapiens	APC	Homo sapiens	Luciferase reporter assay	Functional MTI	24194897
MIRT125926	hsa-miR-320a	Homo sapiens	PDCD4	Homo sapiens	Luciferase reporter assay//qRT-PCR//Western blot	Functional MTI	27279541
MIRT253103	hsa-miR-125a-5p	Homo sapiens	BCL2L12	Homo sapiens	Luciferase reporter assay//qRT-PCR//Western blot	Functional MTI	26297542
MIRT262091	hsa-miR-320a	Homo sapiens	BMI1	Homo sapiens	Luciferase reporter assay//qRT-PCR//Western blot	Functional MTI	25171860
MIRT271966	hsa-miR-320a	Homo sapiens	ARF1	Homo sapiens	Luciferase reporter assay//Western blot	Functional MTI	24084574
MIRT364544	hsa-miR-320a	Homo sapiens	PBX3	Homo sapiens	Luciferase reporter assay//qRT-PCR//Western blot	Functional MTI	28404547
MIRT364544	hsa-miR-320a	Homo sapiens	PBX3	Homo sapiens	Luciferase reporter assay	Functional MTI	27086852
MIRT364544	hsa-miR-320a	Homo sapiens	PBX3	Homo sapiens	Immunohistochemistry//Luciferase reporter assay//qRT-PCR//Western blot	Functional MTI	28288874
MIRT387672	hsa-miR-125a-5p	Homo sapiens	BCL2	Homo sapiens	Luciferase reporter assay//qRT-PCR//Western blot	Functional MTI	26297542
MIRT437471	hsa-miR-320a	Homo sapiens	NRP1	Homo sapiens	Luciferase reporter assay//qRT-PCR//Western blot	Functional MTI	24114198
MIRT437825	hsa-miR-125a-5p	Homo sapiens	IFNG	Homo sapiens	ELISA//Microarray//qRT-PCR//Western blot//silico analysis	Functional MTI	24759737
MIRT437828	hsa-miR-324-3p	Homo sapiens	WNT2B	Homo sapiens	Luciferase reporter assay	Functional MTI	23583221
MIRT437828	hsa-miR-324-3p	Homo sapiens	WNT2B	Homo sapiens	qRT-PCR//Western blot	Functional MTI	28053597
MIRT438046	hsa-miR-125a-5p	Homo sapiens	TRAF6	Homo sapiens	Luciferase reporter assay//qRT-PCR//Western blot	Functional MTI	24360988
MIRT438128	hsa-miR-296-5p	Homo sapiens	PIN1	Homo sapiens	Luciferase reporter assay	Functional MTI	24915000
MIRT438164	hsa-miR-375	Homo sapiens	PHLPP1	Homo sapiens	Luciferase reporter assay//Northern blot//qRT-PCR//Western blot	Functional MTI	24337069
MIRT438214	hsa-miR-133b	Homo sapiens	CXCR4	Homo sapiens	Luciferase reporter assay//qRT-PCR//Western blot	Functional MTI	24330809
MIRT438251	hsa-miR-133b	Homo sapiens	MMP9	Homo sapiens	Luciferase reporter assay	Functional MTI	24714873
MIRT438280	hsa-miR-127-3p	Homo sapiens	SFRP1	Homo sapiens	Luciferase reporter assay//qRT-PCR//Western blot	Functional MTI	24517116
MIRT438303	hsa-miR-133b	Homo sapiens	CTGF	Homo sapiens	Luciferase reporter assay	Functional MTI	24065814
MIRT438303	hsa-miR-133b	Homo sapiens	CTGF	Homo sapiens	Immunohistochemistry//Luciferase reporter assay//qRT-PCR//Western blot	Functional MTI	25451078
MIRT438303	hsa-miR-133b	Homo sapiens	CTGF	Homo sapiens	Immunofluorescence//Immunohistochemistry//In situ hybridization//Luciferase reporter assay//qRT-PCR//Western blot	Functional MTI	26945106
MIRT438404	hsa-miR-326	Homo sapiens	CD274	Homo sapiens	Luciferase reporter assay//qRT-PCR	Functional MTI	24577056
MIRT438486	hsa-miR-320a	Homo sapiens	PTEN	Homo sapiens	Luciferase reporter assay	Functional MTI	24161401
MIRT438492	hsa-miR-139-5p	Homo sapiens	PIK3CA	Homo sapiens	Luciferase reporter assay	Functional MTI	24158791
MIRT438493	hsa-miR-139-5p	Homo sapiens	NFKB1	Homo sapiens	Luciferase reporter assay	Functional MTI	24158791
MIRT438494	hsa-miR-139-5p	Homo sapiens	HRAS	Homo sapiens	Luciferase reporter assay	Functional MTI	24158791
MIRT438505	hsa-miR-193a-5p	Homo sapiens	ERBB2	Homo sapiens	Luciferase reporter assay	Functional MTI	24148764
MIRT438505	hsa-miR-193a-5p	Homo sapiens	ERBB2	Homo sapiens	Luciferase reporter assay	Functional MTI	27203740
MIRT438711	hsa-miR-486-5p	Homo sapiens	IGF1R	Homo sapiens	Luciferase reporter assay//qRT-PCR//Western blot	Functional MTI	23980150
MIRT438713	hsa-miR-129-5p	Homo sapiens	RET	Homo sapiens	qRT-PCR//Western blot	Functional MTI	24631532
MIRT528157	hsa-miR-324-3p	Homo sapiens	BCL2L1	Homo sapiens	Luciferase reporter assay//Microarray//qRT-PCR//Western blot	Functional MTI	27245778
MIRT628130	hsa-miR-129-5p	Homo sapiens	HMGB1	Homo sapiens	Luciferase reporter assay//qRT-PCR//Western blot	Functional MTI	26720492
MIRT628130	hsa-miR-129-5p	Homo sapiens	HMGB1	Homo sapiens	Immunohistochemistry//Luciferase reporter assay//qRT-PCR//Western blot	Functional MTI	27191994
MIRT731262	hsa-miR-129-5p	Homo sapiens	NR4A2	Homo sapiens	Luciferase reporter assay	Functional MTI	26824182
MIRT731367	hsa-miR-486-5p	Homo sapiens	FBN1	Homo sapiens	Luciferase reporter assay	Functional MTI	27133060
MIRT731550	hsa-miR-139-5p	Homo sapiens	OIP5	Homo sapiens	Luciferase reporter assay//qRT-PCR//Western blot	Functional MTI	27916718
MIRT731583	hsa-miR-486-5p	Homo sapiens	CDK4	Homo sapiens	Luciferase reporter assay	Functional MTI	27049724
MIRT731620	hsa-miR-133b	Homo sapiens	FAS	Homo sapiens	Luciferase reporter assay	Functional MTI	26919791
MIRT731625	hsa-miR-125a-5p	Homo sapiens	STAT3	Homo sapiens	Immunoblot//Luciferase reporter assay//qRT-PCR//Immunohistochemistry	Functional MTI	26389681
MIRT731643	hsa-miR-133b	Homo sapiens	SIRT1	Homo sapiens	Luciferase reporter assay	Functional MTI	27166997
MIRT731643	hsa-miR-133b	Homo sapiens	SIRT1	Homo sapiens	Luciferase reporter assay	Functional MTI	27090017
MIRT731708	hsa-miR-296-5p	Homo sapiens	S100B	Homo sapiens	Luciferase reporter assay//qRT-PCR//Western blot	Functional MTI	27186401
MIRT731739	hsa-miR-331-3p	Homo sapiens	ING5	Homo sapiens	Immunohistochemistry//Luciferase reporter assay//qRT-PCR//Western blot	Functional MTI	26497554
MIRT731763	hsa-miR-326	Homo sapiens	FGF1	Homo sapiens	Immunohistochemistry//Luciferase reporter assay//qRT-PCR//Western blot	Functional MTI	26183397
MIRT731772	hsa-miR-133b	Homo sapiens	BCL2L1	Homo sapiens	ChIP-seq//Luciferase reporter assay//qRT-PCR//Western blot	Functional MTI	26276722
MIRT731779	hsa-miR-125a-5p	Homo sapiens	MCL1	Homo sapiens	Luciferase reporter assay//qRT-PCR//Western blot	Functional MTI	26297542
MIRT731794	hsa-miR-320a	Homo sapiens	SUZ12	Homo sapiens	Immunofluorescence//Luciferase reporter assay//Western blot	Functional MTI	27582550
MIRT731821	hsa-miR-139-5p	Homo sapiens	SMARCA4	Homo sapiens	Northern blot//qRT-PCR//Western blot	Functional MTI	27605510
MIRT731875	hsa-miR-574-3p	Homo sapiens	SMAD4	Homo sapiens	Luciferase reporter assay//qRT-PCR//Western blot	Functional MTI	28105233
MIRT731901	hsa-miR-139-5p	Homo sapiens	TPD52	Homo sapiens	Luciferase reporter assay//qRT-PCR//Western blot	Functional MTI	27785063
MIRT731906	hsa-miR-299-5p	Homo sapiens	ATG5	Homo sapiens	Luciferase reporter assay	Functional MTI	27080144
MIRT731927	hsa-miR-320a	Homo sapiens	FOXM1	Homo sapiens	Luciferase reporter assay//Immunohistochemistry//qRT-PCR//Western blot	Functional MTI	27086911
MIRT731991	hsa-miR-125a-5p	Homo sapiens	MAPK14	Homo sapiens	Luciferase reporter assay	Functional MTI	28386337
MIRT731994	hsa-miR-490-3p	Homo sapiens	ABCC2	Homo sapiens	Immunohistochemistry//Luciferase reporter assay//qRT-PCR//Western blot	Functional MTI	28386339
MIRT732083	hsa-miR-139-5p	Homo sapiens	MET	Homo sapiens	Immunofluorescence//Luciferase reporter assay//qRT-PCR//Western blot	Functional MTI	26497851
MIRT732085	hsa-miR-375	Homo sapiens	CTNNB1	Homo sapiens	Luciferase reporter assay	Functional MTI	28158288
MIRT732109	hsa-miR-296-5p	Homo sapiens	PLK1	Homo sapiens	Luciferase reporter assay//Western blot	Functional MTI	26549165
MIRT732185	hsa-miR-125a-5p	Homo sapiens	CASP2	Homo sapiens	Flow//Luciferase reporter assay//qRT-PCR//Western blot	Functional MTI	26962687
MIRT732226	hsa-miR-490-3p	Homo sapiens	TGFBR1	Homo sapiens	Luciferase reporter assay//Western blot	Functional MTI	26714817
MIRT732232	hsa-miR-139-5p	Homo sapiens	BCL2	Homo sapiens	Luciferase reporter assay//qRT-PCR//Western blot	Functional MTI	27244080
MIRT732374	hsa-miR-320a	Homo sapiens	MTDH	Homo sapiens	Immunohistochemistry//Luciferase reporter assay//qRT-PCR//Western blot//Chromogenic in situ hybridization	Functional MTI	27229534
MIRT732551	hsa-miR-490-3p	Homo sapiens	HMGA2	Homo sapiens	Luciferase reporter assay//qRT-PCR//Western blot	Functional MTI	26341146
MIRT732557	hsa-miR-486-5p	Homo sapiens	SMAD2	Homo sapiens	Luciferase reporter assay//qRT-PCR//Western blot	Functional MTI	26370615
MIRT732583	hsa-miR-320a	Homo sapiens	VEGFA	Homo sapiens	Western blot	Functional MTI	26837315
MIRT732589	hsa-miR-490-3p	Homo sapiens	TGFA	Homo sapiens	Luciferase reporter assay	Functional MTI	26843615
MIRT732705	hsa-miR-129-5p	Homo sapiens	PDPK1	Homo sapiens	Luciferase reporter assay	Functional MTI	26884980
MIRT732710	hsa-miR-125a-5p	Homo sapiens	DLL4	Homo sapiens	Flow//Immunofluorescence//Luciferase reporter assay//Western blot	Functional MTI	27252357
MIRT732722	hsa-miR-296-5p	Homo sapiens	HMGA1	Homo sapiens	Luciferase reporter assay	Functional MTI	26898758
MIRT732815	hsa-miR-486-5p	Homo sapiens	SNAI1	Homo sapiens	Luciferase reporter assay//Western blot	Functional MTI	27877055
MIRT732822	hsa-miR-490-3p	Homo sapiens	RHOA	Homo sapiens	Immunohistochemistry//Luciferase reporter assay//Western blot	Functional MTI	27524906
MIRT732862	hsa-miR-324-5p	Homo sapiens	CD274	Homo sapiens	Luciferase reporter assay	Functional MTI	27080341
MIRT733005	hsa-miR-486-5p	Homo sapiens	NRP2	Homo sapiens	Luciferase reporter assay//Western blot	Functional MTI	27284245
MIRT733102	hsa-miR-125a-5p	Homo sapiens	HAX1	Homo sapiens	Luciferase reporter assay//qRT-PCR//Western blot	Functional MTI	27880721
MIRT733105	hsa-miR-342-3p	Homo sapiens	CTBP2	Homo sapiens	Luciferase reporter assay//qRT-PCR//Western blot	Functional MTI	25895816
MIRT733126	hsa-miR-326	Homo sapiens	FSCN1	Homo sapiens	Luciferase reporter assay//qRT-PCR//Western blot	Functional MTI	26359764
MIRT733162	hsa-miR-129-5p	Homo sapiens	IGF2BP3	Homo sapiens	Luciferase reporter assay//qRT-PCR//Western blot	Functional MTI	26510428
MIRT733163	hsa-miR-129-5p	Homo sapiens	MAPK1	Homo sapiens	Luciferase reporter assay//qRT-PCR//Western blot	Functional MTI	26510428
MIRT733164	hsa-miR-129-5p	Homo sapiens	IGF1	Homo sapiens	Luciferase reporter assay//qRT-PCR//Western blot	Functional MTI	26510428
MIRT733284	hsa-miR-320a	Homo sapiens	VIM	Homo sapiens	GFP reporter assay//qRT-PCR//Western blot	Functional MTI	27448976
MIRT733285	hsa-miR-320a	Homo sapiens	USP14	Homo sapiens	GFP reporter assay//qRT-PCR//Western blot	Functional MTI	27448976
MIRT733368	hsa-miR-129-5p	Homo sapiens	VIM	Homo sapiens	qRT-PCR//Western blot	Functional MTI	28105223
MIRT733369	hsa-miR-129-5p	Homo sapiens	CDH1	Homo sapiens	qRT-PCR//Western blot	Functional MTI	28105223
MIRT733392	hsa-miR-133b	Homo sapiens	NUP214	Homo sapiens	Immunoblot//Luciferase reporter assay//qRT-PCR	Functional MTI	25743594
MIRT733534	hsa-miR-193a-5p	Homo sapiens	WT1	Homo sapiens	Luciferase reporter assay//Immunofluorescence//Western blot//qRT-PCR	Functional MTI	27821145
MIRT733660	hsa-miR-330-3p	Homo sapiens	MSI1	Homo sapiens	Luciferase reporter assay//qRT-PCR//Western blot	Functional MTI	27904681
MIRT733708	hsa-miR-129-5p	Homo sapiens	TWIST1	Homo sapiens	Luciferase reporter assay//qRT-PCR//Western blot	Functional MTI	26460733
MIRT733728	hsa-miR-320a	Homo sapiens	ABCG2	Homo sapiens	Luciferase reporter assay//Western blot	Functional MTI	28008607
MIRT733732	hsa-miR-574-3p	Homo sapiens	TGFB1	Homo sapiens	Luciferase reporter assay//qRT-PCR//Western blot	Functional MTI	28042090
MIRT733803	hsa-miR-129-5p	Homo sapiens	BECN1	Homo sapiens	Luciferase reporter assay//qRT-PCR//Western blot	Functional MTI	27186312
MIRT733921	hsa-miR-127-3p	Homo sapiens	MGMT	Homo sapiens	Microarray//qRT-PCR//Western blot	Functional MTI	27057640
MIRT733943	hsa-miR-324-5p	Homo sapiens	ETS1	Homo sapiens	ELISA//Luciferase reporter assay//qRT-PCR//Western blot	Functional MTI	26177288
MIRT733956	hsa-miR-320a	Homo sapiens	CTNNB1	Homo sapiens	qRT-PCR//Western blot	Functional MTI	28105205
MIRT733956	hsa-miR-320a	Homo sapiens	CTNNB1	Homo sapiens	Luciferase reporter assay//qRT-PCR//Western blot	Functional MTI	28356931
MIRT734057	hsa-miR-193a-5p	Homo sapiens	PIK3R3	Homo sapiens	Luciferase reporter assay//qRT-PCR//Western blot	Functional MTI	24469061
MIRT734058	hsa-miR-193a-5p	Homo sapiens	MTOR	Homo sapiens	Luciferase reporter assay//qRT-PCR//Western blot	Functional MTI	24469061
MIRT734091	hsa-miR-339-5p	Homo sapiens	MDM2	Homo sapiens	Luciferase reporter assay	Functional MTI	24882579
MIRT734093	hsa-miR-375	Homo sapiens	STAT3	Homo sapiens	Western blot	Functional MTI	28186962
MIRT734094	hsa-miR-375	Homo sapiens	MAPK3	Homo sapiens	Western blot	Functional MTI	28186962
MIRT734110	hsa-miR-423-3p	Homo sapiens	BCL2L11	Homo sapiens	Immunohistochemistry//Luciferase reporter assay//qRT-PCR//Western blot	Functional MTI	28254439
MIRT734111	hsa-miR-484	Homo sapiens	ZEB1	Homo sapiens	GFP reporter assay//Western blot	Functional MTI	28286418
MIRT734134	hsa-miR-320a	Homo sapiens	CRKL	Homo sapiens	Luciferase reporter assay//qRT-PCR//Western blot	Functional MTI	28255248
MIRT734301	hsa-miR-125a-5p	Homo sapiens	PIK3CG	Homo sapiens	qRT-PCR//Western blot	Functional MTI	26622553
MIRT734302	hsa-miR-125a-5p	Homo sapiens	AKT1	Homo sapiens	qRT-PCR//Western blot	Functional MTI	26622553
MIRT734303	hsa-miR-125a-5p	Homo sapiens	MTOR	Homo sapiens	qRT-PCR//Western blot	Functional MTI	26622553
MIRT734322	hsa-miR-129-5p	Homo sapiens	COL1A1	Homo sapiens	Luciferase reporter assay//qRT-PCR//Western blot	Functional MTI	28482162
MIRT734356	hsa-miR-486-5p	Homo sapiens	FOXO1	Homo sapiens	Luciferase reporter assay//Western blot	Functional MTI	25515961
MIRT734357	hsa-miR-486-5p	Homo sapiens	PTEN	Homo sapiens	Luciferase reporter assay//Western blot	Functional MTI	25515961
MIRT734357	hsa-miR-486-5p	Homo sapiens	PTEN	Homo sapiens	Luciferase reporter assay//Next Generation Sequencing (NGS)//qRT-PCR//Western blot	Functional MTI	27650731
MIRT734358	hsa-miR-139-5p	Homo sapiens	WNT1	Homo sapiens	Luciferase reporter assay//Western blot	Functional MTI	25529604
MIRT734372	hsa-miR-125a-5p	Homo sapiens	MEG3	Homo sapiens	ELISA//Luciferase reporter assay//qRT-PCR//Western blot	Functional MTI	27522004
MIRT734428	hsa-miR-193a-5p	Homo sapiens	ING5	Homo sapiens	Luciferase reporter assay//qRT-PCR//Western blot	Functional MTI	25991669
MIRT734465	hsa-miR-127-3p	Homo sapiens	XRCC3	Homo sapiens	Luciferase reporter assay//qRT-PCR//Western blot	Functional MTI	27590853
MIRT734474	hsa-miR-342-3p	Homo sapiens	MTDH	Homo sapiens	Luciferase reporter assay//Western blot	Functional MTI	28112756
MIRT734542	hsa-miR-133b	Homo sapiens	SGK1	Homo sapiens	Luciferase reporter assay//qRT-PCR//Western blot	Functional MTI	26840046
MIRT734604	hsa-miR-28-3p	Homo sapiens	STAT5B	Homo sapiens	Luciferase reporter assay	Functional MTI	24681953
MIRT734605	hsa-miR-28-3p	Homo sapiens	TP53	Homo sapiens	Luciferase reporter assay	Functional MTI	24681953
MIRT734648	hsa-miR-125a-5p	Homo sapiens	HDAC5	Homo sapiens	Flow//Immunoblot//Luciferase reporter assay//qRT-PCR//Western blot	Functional MTI	25531695
MIRT734661	hsa-miR-139-5p	Homo sapiens	MMP11	Homo sapiens	Luciferase reporter assay//Microarray//qRT-PCR//Western blot	Functional MTI	27355528
MIRT734669	hsa-miR-296-5p	Homo sapiens	FGFR1	Homo sapiens	Immunohistochemistry//Luciferase reporter assay//qRT-PCR//Western blot	Functional MTI	27714806
MIRT734695	hsa-miR-342-3p	Homo sapiens	BIRC6	Homo sapiens	Luciferase reporter assay//Western blot	Functional MTI	26919240
MIRT734728	hsa-miR-125a-5p	Homo sapiens	RAF1	Homo sapiens	Luciferase reporter assay//qRT-PCR//Western blot	Functional MTI	27982429
MIRT734732	hsa-miR-342-3p	Homo sapiens	E2F1	Homo sapiens	Luciferase reporter assay//qRT-PCR//Western blot	Functional MTI	26483346
MIRT734757	hsa-miR-125a-5p	Homo sapiens	E2F3	Homo sapiens	Flow//Luciferase reporter assay//qRT-PCR//Western blot	Functional MTI	25733534
MIRT734781	hsa-miR-133b	Homo sapiens	GSTP1	Homo sapiens	Luciferase reporter assay	Functional MTI	26396496
MIRT734845	hsa-miR-375	Homo sapiens	MALAT1	Homo sapiens	Luciferase reporter assay//qRT-PCR	Functional MTI	27658300
MIRT734869	hsa-miR-193a-5p	Homo sapiens	TFAP2A	Homo sapiens	Luciferase reporter assay//Western blot	Functional MTI	27698912
MIRT734906	hsa-miR-296-5p	Homo sapiens	VEGFA	Homo sapiens	qRT-PCR//Western blot	Functional MTI	26500043
MIRT734907	hsa-miR-296-5p	Homo sapiens	KDR	Homo sapiens	qRT-PCR//Western blot	Functional MTI	26500043
MIRT734908	hsa-miR-296-5p	Homo sapiens	DLL4	Homo sapiens	qRT-PCR//Western blot	Functional MTI	26500043
MIRT734909	hsa-miR-296-5p	Homo sapiens	NOTCH1	Homo sapiens	qRT-PCR//Western blot	Functional MTI	26500043
MIRT734976	hsa-miR-296-5p	Homo sapiens	CASP8	Homo sapiens	Immunoprecipitaion//Luciferase reporter assay//qRT-PCR	Functional MTI	27927008
MIRT734977	hsa-miR-296-5p	Homo sapiens	NGFR	Homo sapiens	Immunoprecipitaion//Luciferase reporter assay//qRT-PCR	Functional MTI	27927008
MIRT734988	hsa-miR-125a-5p	Homo sapiens	JAK2	Homo sapiens	qRT-PCR//Western blot	Functional MTI	26011312
MIRT735092	hsa-miR-320a	Homo sapiens	AR	Homo sapiens	Luciferase reporter assay	Functional MTI	27216188
MIRT735098	hsa-miR-125a-5p	Homo sapiens	SMAD2	Homo sapiens	Luciferase reporter assay	Functional MTI	27388239
MIRT735108	hsa-miR-320a	Homo sapiens	HMGB1	Homo sapiens	Luciferase reporter assay//qRT-PCR//Western blot	Functional MTI	28317284
MIRT735132	hsa-miR-423-3p	Homo sapiens	PA2G4	Homo sapiens	Luciferase reporter assay//qRT-PCR//Western blot	Functional MTI	25926693
MIRT735148	hsa-miR-375	Homo sapiens	RUNX3	Homo sapiens	Luciferase reporter assay//qRT-PCR//Western blot	Functional MTI	26170936
MIRT735170	hsa-miR-330-3p	Homo sapiens	PDCD4	Homo sapiens	Luciferase reporter assay//Microarray//qRT-PCR//Western blot	Functional MTI	26045986
MIRT735192	hsa-miR-326	Homo sapiens	BCL2L1	Homo sapiens	Luciferase reporter assay//qRT-PCR//Western blot	Functional MTI	25875481
MIRT735258	hsa-miR-125a-5p	Homo sapiens	ARID3A	Homo sapiens	Luciferase reporter assay//qRT-PCR//Western blot	Functional MTI	28408353
MIRT735338	hsa-miR-486-5p	Homo sapiens	PIK3R1	Homo sapiens	Luciferase reporter assay//Next Generation Sequencing (NGS)//qRT-PCR//Western blot	Functional MTI	25475121
MIRT735416	hsa-miR-320a	Homo sapiens	FAS	Homo sapiens	Luciferase reporter assay//qRT-PCR//Western blot	Functional MTI	27277534
MIRT735418	hsa-miR-375	Homo sapiens	KLF4	Homo sapiens	qRT-PCR//Western blot	Functional MTI	27279635
MIRT735487	hsa-miR-320a	Homo sapiens	CDK6	Homo sapiens	Luciferase reporter assay//Microarray//qRT-PCR//Western blot	Functional MTI	27559432
MIRT735518	hsa-miR-133b	Homo sapiens	GLI3	Homo sapiens	Microarray//qRT-PCR//Western blot	Functional MTI	26755652
