# Supplementary material for: Identification of colorectal cancer associated biomarkers: an integrated analysis of miRNA expression
Source: Aging (Albany NY). 2021 Sep 21;13(18):21991–2029. doi: 10.18632/aging.203556 (PMC8507258; doi:10.18632/aging.203556)
Supplement: Supplementary Table 3 [file aging-13-203556-s004.xlsx]

## Sheet: Supplementary Table III
Supplementary Table 3. CRC regulation status for the 172 miRNAs-target genes found to be involved in colorectal carcinoma development obtained from the Colorectal Cancer Gene Database (CoReCG).
Genes	log2(foldchange)	Regulation status
NTRK3	-1.2791	Downregulated
SFRP1	-1.22015	Downregulated
ABCG2	-1.05321	Downregulated
WNT1	-1.03172	Downregulated
AR	-0.944373	Downregulated
LIFR	-0.759246	Downregulated
S100B	-0.627555	Downregulated
NGFR	-0.605884	Downregulated
IGF1	-0.566531	Downregulated
PIK3CG	-0.552331	Downregulated
RET	-0.54256	Downregulated
WNT2B	-0.496102	Downregulated
GLI3	-0.409688	Downregulated
KLF4	-0.35917	Downregulated
SGK1	-0.34149	Downregulated
BCL2	-0.340343	Downregulated
ABCB1	-0.317574	Downregulated
ITGB3	-0.286327	Downregulated
GNAI1	-0.276459	Downregulated
FAS	-0.257984	Downregulated
PDCD4	-0.2284	Downregulated
ZEB1	-0.227826	Downregulated
FGF1	-0.221806	Downregulated
PRDM16	-0.192401	Downregulated
FGFR1	-0.188509	Downregulated
AQP1	-0.175333	Downregulated
MSI1	-0.168081	Downregulated
CDKN1A	-0.167999	Downregulated
FOXO1	-0.148588	Downregulated
ERG	-0.148368	Downregulated
BCL2L11	-0.14807	Downregulated
MAPK3	-0.142739	Downregulated
TGFA	-0.142585	Downregulated
APC	-0.140257	Downregulated
RXRA	-0.131165	Downregulated
HK2	-0.128602	Downregulated
PBX3	-0.127604	Downregulated
EGFR	-0.119823	Downregulated
SMAD4	-0.109204	Downregulated
BAK1	-0.108055	Downregulated
VIM	-0.107427	Downregulated
CD274	-0.105558	Downregulated
FOS	-0.105535	Downregulated
ID4	-0.104487	Downregulated
PRDM1	-0.103767	Downregulated
GLI1	-0.0987514	Downregulated
ETS1	-0.0972149	Downregulated
NRP1	-0.0971094	Downregulated
PHLPP1	-0.0952117	Downregulated
PTEN	-0.0903642	Downregulated
JAK2	-0.0900656	Downregulated
CDX1	-0.0897133	Downregulated
TRAF6	-0.0825555	Downregulated
NRP2	-0.0788528	Downregulated
RUNX3	-0.0734476	Downregulated
PIK3R1	-0.0706589	Downregulated
SMAD2	-0.0678578	Downregulated
CDC42	-0.0675753	Downregulated
MGMT	-0.0616077	Downregulated
TPD52	-0.0587981	Downregulated
RAF1	-0.0545655	Downregulated
HDAC5	-0.0509967	Downregulated
MAPK1	-0.0506729	Downregulated
NOTCH2	-0.0489539	Downregulated
PDK1	-0.0483731	Downregulated
CAMTA1	-0.0478958	Downregulated
TNFAIP3	-0.0477142	Downregulated
TGFB1	-0.0473777	Downregulated
ERBB2	-0.0469529	Downregulated
CXCR4	-0.0442113	Downregulated
FBN1	-0.0441371	Downregulated
NFKB1	-0.0411903	Downregulated
SIRT1	-0.0408423	Downregulated
MCL1	-0.0400101	Downregulated
ATG5	-0.0398432	Downregulated
BCL6	-0.0396908	Downregulated
PIN1	-0.0389453	Downregulated
STAT3	-0.0386246	Downregulated
PIK3CA	-0.0341076	Downregulated
EP300	-0.0340034	Downregulated
BECN1	-0.0316273	Downregulated
MTOR	-0.0310967	Downregulated
ADIPOR2	-0.030587	Downregulated
OLFM4	-0.0292291	Downregulated
PDPK1	-0.027882	Downregulated
STAT5B	-0.0244554	Downregulated
RHOA	-0.0233534	Downregulated
CD9	-0.0229385	Downregulated
CDH1	-0.0214443	Downregulated
SMO	-0.0205981	Downregulated
AKT1	-0.0158895	Downregulated
MAPK14	-0.0144831	Downregulated
BIRC6	-0.0100758	Downregulated
ROCK2	-0.00871036	Downregulated
DVL2	-0.00802156	Downregulated
ARF1	-0.00609441	Downregulated
FHIT	0.00317592	Upregulated
MEG3	0.00360781	Upregulated
SKI	0.00365627	Upregulated
CRKL	0.00428839	Upregulated
MSH3	0.00521456	Upregulated
HAX1	0.00558453	Upregulated
IGF1R	0.0065687	Upregulated
RAC1	0.00719762	Upregulated
KDR	0.0112136	Upregulated
NR4A2	0.0116879	Upregulated
BMI1	0.0155128	Upregulated
NUP214	0.0195056	Upregulated
TGFBR1	0.0219561	Upregulated
ERBB3	0.0220379	Upregulated
MDM2	0.0231401	Upregulated
CTBP2	0.0234354	Upregulated
PIK3R3	0.0258951	Upregulated
JUN	0.0300035	Upregulated
CTGF	0.0318824	Upregulated
HRAS	0.0338502	Upregulated
USP14	0.0403629	Upregulated
CASP8	0.0413673	Upregulated
MALAT1	0.0426193	Upregulated
CTNNB1	0.0445101	Upregulated
TFRC	0.0492674	Upregulated
TP53	0.0508378	Upregulated
NOTCH1	0.0518448	Upregulated
MAP3K8	0.0589662	Upregulated
TAGLN2	0.0592463	Upregulated
MTDH	0.0643144	Upregulated
ING5	0.0692811	Upregulated
SUZ12	0.0703062	Upregulated
YAP1	0.0758533	Upregulated
LDHB	0.0762429	Upregulated
SMARCA4	0.0851459	Upregulated
DLL4	0.0860309	Upregulated
GSTP1	0.0864391	Upregulated
HMGB1	0.0896966	Upregulated
CDK6	0.096953	Upregulated
PA2G4	0.108207	Upregulated
CASP2	0.10845	Upregulated
BCL2L1	0.115893	Upregulated
XRCC3	0.124085	Upregulated
FSCN1	0.12715	Upregulated
DNMT1	0.130034	Upregulated
CD44	0.142815	Upregulated
HMGA1	0.15277	Upregulated
CDK4	0.157154	Upregulated
BCL2L12	0.164867	Upregulated
OIP5	0.168067	Upregulated
EIF4EBP1	0.171961	Upregulated
E2F3	0.172232	Upregulated
MMP9	0.172709	Upregulated
HMGA2	0.184764	Upregulated
PLK1	0.198945	Upregulated
FOXM1	0.202179	Upregulated
VEGFA	0.202784	Upregulated
CCND1	0.20669	Upregulated
MYC	0.222082	Upregulated
SOX4	0.235508	Upregulated
COL1A1	0.236946	Upregulated
MET	0.240038	Upregulated
E2F1	0.295383	Upregulated
ARID3A	0.351515	Upregulated
BMP7	0.404726	Upregulated
SNAI1	0.409422	Upregulated
TWIST1	0.446904	Upregulated
SPP1	0.44952	Upregulated
IFNG	0.514119	Upregulated
MMP11	0.603495	Upregulated
TP73	0.649698	Upregulated
IGF2BP3	0.688667	Upregulated
TFAP2A	0.705333	Upregulated
ABCC2	0.845024	Upregulated
WT1	2.15616	Upregulated
MMP13	2.79874	Upregulated
