# Supplementary material for: Identification of colorectal cancer associated biomarkers: an integrated analysis of miRNA expression
Source: Aging (Albany NY). 2021 Sep 21;13(18):21991–2029. doi: 10.18632/aging.203556 (PMC8507258; doi:10.18632/aging.203556)
Supplement: Supplementary Table 4 [file aging-13-203556-s005.xlsx]

## Sheet: Supplementary Table IV
Supplementary Table 4. Correlation coefficients between the 25 miRNAs and their 172 experimentally validated target-genes obtained from the Colorectal Cancer Gene Database (CoReCG).
	miRNA	Genes	Correlation coefficient	Correlation status	Correlation p-value	Correlation statistical test	MiRNA shaprio p-value	Gene shapiro p-value
1	hsa-miR-375	YAP1	-0.478161	Negative	4.99148e-20	spearman	0.0410669	0.000930292
2	hsa-miR-484	ZEB1	-0.381368	Negative	1.1728e-12	pearson	0.270384	0.454034
3	hsa-miR-375	MAP3K8	-0.307292	Negative	1.47342e-08	spearman	0.0410669	0.00293423
4	hsa-miR-125a-5p	HK2	-0.269033	Negligible Negative	1.12331e-06	pearson	0.591954	0.450406
5	hsa-miR-324-5p	GLI1	-0.263499	Negligible Negative	1.45442e-06	spearman	0.0863281	0.000152227
6	hsa-miR-339-5p	BCL6	-0.260565	Negligible Negative	2.06431e-06	pearson	0.257835	0.85807
7	hsa-miR-324-5p	ETS1	-0.24743	Negligible Negative	6.36742e-06	pearson	0.0863281	0.311918
8	hsa-miR-125a-5p	BAK1	-0.231637	Negligible Negative	3.02885e-05	pearson	0.591954	0.274183
9	hsa-miR-331-3p	NRP2	-0.22868	Negligible Negative	3.15496e-05	pearson	0.2609	0.646146
10	hsa-miR-320a	PBX3	-0.214812	Negligible Negative	9.48801e-05	pearson	0.625754	0.0955527
11	hsa-miR-299-5p	ATG5	-0.209025	Negligible Negative	0.000143748	spearman	0.02812	1.13449e-06
12	hsa-miR-320a	VIM	-0.201585	Negligible Negative	0.000254453	pearson	0.625754	0.580826
13	hsa-miR-320a	MYC	-0.196488	Negligible Negative	0.000366094	spearman	0.625754	3.72165e-06
14	hsa-miR-326	CD9	-0.190765	Negligible Negative	0.000534219	spearman	0.330446	7.05541e-06
15	hsa-miR-486-5p	FBN1	-0.184937	Negligible Negative	0.000823126	spearman	0.323512	0.00932745
16	hsa-miR-375	MTDH	-0.183126	Negligible Negative	0.000894203	spearman	0.0410669	0.00506351
17	hsa-miR-375	RUNX3	-0.179247	Negligible Negative	0.00115276	spearman	0.0410669	0.247151
18	hsa-miR-320a	NRP1	-0.175808	Negligible Negative	0.00146244	pearson	0.625754	0.1133
19	hsa-miR-324-3p	WNT2B	-0.165145	Negligible Negative	0.00282423	pearson	0.535329	0.106968
20	hsa-miR-486-5p	IGF1R	-0.164709	Negligible Negative	0.00294289	spearman	0.323512	1.27589e-06
21	hsa-miR-125a-5p	CDKN1A	-0.157171	Negligible Negative	0.00496653	pearson	0.591954	0.212736
22	hsa-miR-320a	ITGB3	-0.155583	Negligible Negative	0.00493669	spearman	0.625754	0.00445817
23	hsa-miR-326	BCL2L1	-0.152865	Negligible Negative	0.00567958	pearson	0.330446	0.326704
24	hsa-miR-423-3p	BCL2L11	-0.147236	Negligible Negative	0.00775096	pearson	0.694961	0.170112
25	hsa-miR-320a	AR	-0.147174	Negligible Negative	0.00787279	spearman	0.625754	9.94765e-08
26	hsa-miR-133b	TAGLN2	-0.146542	Negligible Negative	0.0111791	spearman	1.04169e-09	0.014109
27	hsa-miR-324-5p	CD274	-0.140145	Negligible Negative	0.0114305	spearman	0.0863281	0.00417934
28	hsa-miR-324-5p	SMO	-0.135734	Negligible Negative	0.0143298	spearman	0.0863281	7.20075e-05
29	hsa-miR-320a	MTDH	-0.134562	Negligible Negative	0.0152008	spearman	0.625754	0.0045458
30	hsa-miR-486-5p	NRP2	-0.133282	Negligible Negative	0.0163721	pearson	0.323512	0.668512
31	hsa-miR-320b	MYC	-0.130778	Negligible Negative	0.017806	spearman	0.0808893	2.41888e-06
32	hsa-miR-330-3p	E2F1	-0.130057	Negligible Negative	0.0186313	pearson	0.567572	0.688613
33	hsa-miR-326	MSH3	-0.125398	Negligible Negative	0.0235515	spearman	0.330446	5.12913e-15
34	hsa-miR-129-5p	CAMTA1	-0.121648	Negligible Negative	0.0311601	spearman	1.83945e-05	0.462022
35	hsa-miR-375	PIK3CA	-0.120705	Negligible Negative	0.0293327	spearman	0.0410669	4.98043e-05
36	hsa-miR-486-5p	PIK3R1	-0.119851	Negligible Negative	0.0310241	spearman	0.323512	0.00201881
37	hsa-miR-484	SMAD2	-0.11881	Negligible Negative	0.0325252	spearman	0.270384	7.62916e-15
38	hsa-miR-375	IGF1R	-0.118617	Negligible Negative	0.0322716	spearman	0.0410669	1.0809e-06
39	hsa-miR-320a	TFRC	-0.115591	Negligible Negative	0.0372692	spearman	0.625754	0.00301686
40	hsa-miR-139-5p	OIP5	-0.115564	Negligible Negative	0.0376103	spearman	0.042844	0.0734544
41	hsa-miR-320a	SUZ12	-0.114629	Negligible Negative	0.0388901	spearman	0.625754	2.16516e-07
42	hsa-miR-324-3p	BCL2L1	-0.110466	Negligible Negative	0.0466056	pearson	0.535329	0.370845
43	hsa-miR-129-5p	PDPK1	0.110962	Negligible Positive	0.0494752	spearman	1.83945e-05	0.0215513
44	hsa-miR-375	ERBB2	0.111421	Negligible Positive	0.0443991	spearman	0.0410669	4.02025e-23
45	hsa-miR-320a	CDK6	0.112578	Negligible Positive	0.0425444	spearman	0.625754	0.0229566
46	hsa-miR-193a-5p	MTOR	0.119862	Negligible Positive	0.0302343	spearman	0.115523	1.55113e-06
47	hsa-miR-133b	CXCR4	0.120221	Negligible Positive	0.0377412	spearman	1.04169e-09	0.28509
48	hsa-miR-129-5p	MAPK1	0.121277	Negligible Positive	0.0316814	spearman	1.83945e-05	3.21002e-10
49	hsa-miR-129-5p	VIM	0.122185	Negligible Positive	0.0304172	spearman	1.83945e-05	0.666624
50	hsa-miR-139-5p	ROCK2	0.122202	Negligible Positive	0.0278506	spearman	0.042844	1.03865e-05
51	hsa-miR-139-5p	MMP11	0.123462	Negligible Positive	0.0262668	spearman	0.042844	0.554111
52	hsa-miR-296-5p	KDR	0.127335	Negligible Positive	0.0264142	spearman	2.91661e-09	0.0032032
53	hsa-miR-139-5p	NFKB1	0.130874	Negligible Positive	0.0184346	spearman	0.042844	1.53758e-10
54	hsa-miR-127-3p	BCL6	0.133756	Negligible Positive	0.0161555	pearson	0.702426	0.833822
55	hsa-miR-133b	PRDM16	0.141301	Negligible Positive	0.0144706	spearman	1.04169e-09	0.000131147
56	hsa-miR-296-5p	NOTCH1	0.144524	Negligible Positive	0.0116443	spearman	2.91661e-09	0.00782389
57	hsa-miR-296-5p	DLL4	0.147592	Negligible Positive	0.0099697	spearman	2.91661e-09	0.00189154
58	hsa-miR-129-5p	ABCB1	0.151739	Negligible Positive	0.00706617	spearman	1.83945e-05	2.68544e-08
59	hsa-miR-133b	SIRT1	0.151844	Negligible Positive	0.00854089	spearman	1.04169e-09	2.74081e-10
60	hsa-miR-375	TP53	0.15306	Negligible Positive	0.00561779	spearman	0.0410669	2.11871e-17
61	hsa-miR-375	ADIPOR2	0.157223	Negligible Positive	0.00443359	spearman	0.0410669	1.57815e-14
62	hsa-miR-326	FSCN1	0.162309	Negligible Positive	0.00329464	spearman	0.330446	8.33364e-06
63	hsa-miR-139-5p	WNT1	0.165833	Negligible Positive	0.00275146	spearman	0.042844	5.83701e-15
64	hsa-miR-486-5p	OLFM4	0.165979	Negligible Positive	0.00272753	spearman	0.323512	5.5645e-08
65	hsa-miR-133b	BCL2L1	0.166468	Negligible Positive	0.00389408	spearman	1.04169e-09	0.2666
66	hsa-miR-326	CD274	0.168253	Negligible Positive	0.00230394	spearman	0.330446	0.00574484
67	hsa-miR-139-5p	CXCR4	0.1727	Negligible Positive	0.00180815	spearman	0.042844	0.274662
68	hsa-miR-375	PDK1	0.173894	Negligible Positive	0.00162314	spearman	0.0410669	0.116562
69	hsa-miR-139-5p	MCL1	0.17997	Negligible Positive	0.00113978	spearman	0.042844	0.000375462
70	hsa-miR-331-3p	E2F1	0.184481	Negligible Positive	0.000832707	pearson	0.2609	0.717425
71	hsa-miR-129-5p	APC	0.190628	Negligible Positive	0.000684665	spearman	1.83945e-05	5.10272e-09
72	hsa-miR-574-3p	RXRA	0.191343	Negligible Positive	0.000639914	spearman	0.271111	0.0171013
73	hsa-miR-375	MAPK3	0.194484	Negligible Positive	0.000412764	spearman	0.0410669	0.0245646
74	hsa-miR-127-3p	SKI	0.196178	Negligible Positive	0.000390232	spearman	0.702426	1.47299e-07
75	hsa-miR-423-3p	PA2G4	0.197616	Negligible Positive	0.000330926	spearman	0.694961	0.0155935
76	hsa-miR-331-3p	ING5	0.204905	Negligible Positive	0.000199783	pearson	0.2609	0.165864
77	hsa-miR-133b	EGFR	0.211848	Negligible Positive	0.000224415	spearman	1.04169e-09	0.000127523
78	hsa-miR-133b	MMP9	0.21625	Negligible Positive	0.000164336	spearman	1.04169e-09	0.00811115
79	hsa-miR-326	NOTCH2	0.221783	Negligible Positive	5.35805e-05	pearson	0.330446	0.064388
80	hsa-miR-324-3p	DVL2	0.228512	Negligible Positive	3.19856e-05	pearson	0.535329	0.577742
81	hsa-miR-139-5p	BCL2	0.230113	Negligible Positive	2.88584e-05	spearman	0.042844	0.52574
82	hsa-miR-331-3p	PHLPP1	0.232126	Negligible Positive	2.37403e-05	pearson	0.2609	0.888431
83	hsa-miR-139-5p	IGF1R	0.237087	Negligible Positive	1.61257e-05	spearman	0.042844	1.44376e-06
84	hsa-miR-490-3p	TGFBR1	0.238977	Negligible Positive	0.000317067	spearman	2.39408e-10	4.30125e-06
85	hsa-miR-127-3p	PRDM1	0.244006	Negligible Positive	9.18362e-06	pearson	0.702426	0.0741798
86	hsa-miR-125a-5p	LIFR	0.250149	Negligible Positive	6.32498e-06	pearson	0.591954	0.78125
87	hsa-miR-375	PHLPP1	0.256434	Negligible Positive	2.71964e-06	spearman	0.0410669	0.894865
88	hsa-miR-129-5p	RET	0.270024	Negligible Positive	1.19628e-06	spearman	1.83945e-05	1.86966e-05
89	hsa-miR-127-3p	SFRP1	0.270411	Negligible Positive	8.08743e-07	spearman	0.702426	1.9754e-06
90	hsa-miR-125a-5p	MMP11	0.270527	Negligible Positive	9.74076e-07	pearson	0.591954	0.659342
91	hsa-miR-490-3p	CCND1	0.27486	Negligible Positive	3.1559e-05	spearman	2.39408e-10	0.044509
92	hsa-miR-139-5p	PIK3CA	0.275365	Negligible Positive	4.77615e-07	spearman	0.042844	3.40925e-05
93	hsa-miR-125a-5p	NTRK3	0.278805	Negligible Positive	4.35468e-07	spearman	0.591954	4.57597e-09
94	hsa-miR-133b	IGF1R	0.293182	Negligible Positive	2.44018e-07	spearman	1.04169e-09	5.08705e-07
95	hsa-miR-133b	CTGF	0.299799	Negligible Positive	1.26158e-07	spearman	1.04169e-09	0.0854673
96	hsa-miR-125a-5p	HDAC5	0.302188	Positive	3.87208e-08	spearman	0.591954	0.0176104
97	hsa-miR-133b	GLI1	0.310619	Positive	4.13777e-08	spearman	1.04169e-09	0.000187892
98	hsa-miR-129-5p	IGF1	0.311552	Positive	1.70364e-08	spearman	1.83945e-05	0.413215
99	hsa-miR-127-3p	MMP13	0.331407	Positive	1.01878e-09	spearman	0.702426	2.55091e-07
100	hsa-miR-133b	ERG	0.365629	Positive	6.88825e-11	spearman	1.04169e-09	0.681706
101	hsa-miR-125a-5p	MEG3	0.373398	Positive	5.86252e-12	spearman	0.591954	0.0100127
102	hsa-miR-133b	FGFR1	0.386337	Positive	4.41976e-12	spearman	1.04169e-09	0.10391
103	hsa-miR-133b	GLI3	0.417019	Positive	5.21592e-14	spearman	1.04169e-09	0.127212
104	hsa-miR-375	KLF4	0.426543	Positive	7.61833e-16	spearman	0.0410669	0.398108
105	hsa-miR-125a-5p	STAT3	-0.109689	-	0.0506738	spearman	0.591954	0.00318496
106	hsa-miR-133b	FSCN1	0.11055	-	0.0562049	spearman	1.04169e-09	2.90272e-06
107	hsa-miR-129-5p	SOX4	0.106337	-	0.0598189	spearman	1.83945e-05	0.286492
108	hsa-miR-129-5p	HMGB1	-0.104789	-	0.0636568	spearman	1.83945e-05	0.20938
109	hsa-miR-139-5p	TPD52	-0.101903	-	0.06696	spearman	0.042844	0.0822635
110	hsa-miR-296-5p	FGFR1	0.104308	-	0.0693486	spearman	2.91661e-09	0.120614
111	hsa-miR-375	CTNNB1	-0.100482	-	0.0700061	spearman	0.0410669	0.918248
112	hsa-miR-127-3p	MGMT	0.0987315	-	0.0764154	spearman	0.702426	2.07458e-17
113	hsa-miR-139-5p	SMARCA4	0.0984961	-	0.0766629	spearman	0.042844	4.00693e-05
114	hsa-miR-296-5p	PLK1	-0.100007	-	0.0817062	spearman	2.91661e-09	0.184223
115	hsa-miR-330-3p	CDC42	0.0949164	-	0.0865866	spearman	0.567572	0.0183175
116	hsa-miR-125a-5p	AKT1	-0.0961862	-	0.0868113	spearman	0.591954	0.00547305
117	hsa-miR-139-5p	NOTCH1	0.0939934	-	0.0912035	spearman	0.042844	0.00112777
118	hsa-miR-129-5p	CDK6	0.0950917	-	0.0925449	spearman	1.83945e-05	0.0364129
119	hsa-miR-129-5p	CDH1	0.0938468	-	0.0969138	spearman	1.83945e-05	2.39899e-05
120	hsa-miR-486-5p	PTEN	-0.0922939	-	0.0972347	spearman	0.323512	8.85984e-22
121	hsa-miR-342-3p	BMP7	-0.0922754	-	0.102111	spearman	0.170092	7.74285e-10
122	hsa-miR-133b	MCL1	0.0937297	-	0.105768	spearman	1.04169e-09	0.000376619
123	hsa-miR-125a-5p	JAK2	-0.090757	-	0.106226	spearman	0.591954	0.0140864
124	hsa-miR-133b	NUP214	0.0935548	-	0.106423	spearman	1.04169e-09	1.75601e-06
125	hsa-miR-125a-5p	IFNG	-0.0893961	-	0.111594	spearman	0.591954	1.43775e-07
126	hsa-miR-139-5p	FOS	0.0866485	-	0.119572	spearman	0.042844	0.174634
127	hsa-miR-375	JAK2	0.0859184	-	0.121574	spearman	0.0410669	0.0142472
128	hsa-miR-326	FGF1	0.0830934	-	0.134363	pearson	0.330446	0.306143
129	hsa-miR-28-3p	STAT5B	-0.0833071	-	0.138259	spearman	0.643105	2.29798e-06
130	hsa-miR-125a-5p	SMAD2	-0.0831623	-	0.138948	spearman	0.591954	1.1215e-14
131	hsa-miR-133b	GSTP1	-0.0856486	-	0.139537	spearman	1.04169e-09	1.03263e-13
132	hsa-miR-320a	AQP1	-0.0811153	-	0.144538	pearson	0.625754	0.195114
133	hsa-miR-193a-5p	TP73	0.0802198	-	0.147784	spearman	0.115523	3.47775e-05
134	hsa-miR-296-5p	VEGFA	0.0830001	-	0.148827	spearman	2.91661e-09	0.609825
135	hsa-miR-320a	GNAI1	-0.0773304	-	0.164285	spearman	0.625754	0.00689118
136	hsa-miR-339-5p	MDM2	-0.0775461	-	0.164418	spearman	0.257835	1.73597e-07
137	hsa-miR-320a	VEGFA	-0.0769038	-	0.166631	pearson	0.625754	0.514166
138	hsa-miR-574-3p	EGFR	-0.0776106	-	0.169427	spearman	0.271111	0.000458541
139	hsa-miR-574-3p	EP300	0.0771285	-	0.1721	spearman	0.271111	1.83471e-09
140	hsa-miR-574-3p	TGFB1	0.0770457	-	0.172562	pearson	0.271111	0.0530371
141	hsa-miR-299-5p	SPP1	0.0748557	-	0.177576	spearman	0.02812	0.0041673
142	hsa-miR-320a	ARF1	0.0745394	-	0.180094	spearman	0.625754	0.00202543
143	hsa-miR-299-5p	CDKN1A	0.0740116	-	0.182528	spearman	0.02812	0.256883
144	hsa-miR-133b	SGK1	0.0748921	-	0.196567	spearman	1.04169e-09	0.128236
145	hsa-miR-342-3p	MTDH	-0.0727929	-	0.197565	spearman	0.170092	0.00364451
146	hsa-miR-330-3p	MSI1	0.0712426	-	0.198796	spearman	0.567572	0.00412331
147	hsa-miR-375	STAT3	0.0710824	-	0.200504	spearman	0.0410669	0.00322386
148	hsa-miR-129-5p	NOTCH1	0.0723869	-	0.200805	spearman	1.83945e-05	0.00117115
149	hsa-miR-423-3p	CDKN1A	-0.0707773	-	0.202448	pearson	0.694961	0.239577
150	hsa-miR-125a-5p	EIF4EBP1	-0.0710124	-	0.206611	spearman	0.591954	0.0465914
151	hsa-miR-125a-5p	E2F3	0.0708363	-	0.207742	pearson	0.591954	0.787042
152	hsa-miR-320a	BMI1	-0.0695004	-	0.211438	spearman	0.625754	5.03325e-05
153	hsa-miR-320a	ABCG2	-0.0685381	-	0.217846	pearson	0.625754	0.117197
154	hsa-miR-486-5p	CDK4	0.0675325	-	0.225409	spearman	0.323512	0.00210554
155	hsa-miR-125a-5p	ERBB3	-0.067902	-	0.227243	spearman	0.591954	0.00287859
156	hsa-miR-125a-5p	VEGFA	-0.0663664	-	0.237951	pearson	0.591954	0.614676
157	hsa-miR-342-3p	BIRC6	0.0662476	-	0.24104	spearman	0.170092	7.40877e-08
158	hsa-miR-127-3p	XRCC3	-0.064156	-	0.250251	pearson	0.702426	0.430498
159	hsa-miR-133b	RHOA	-0.0607413	-	0.295154	spearman	1.04169e-09	0.0137424
160	hsa-miR-133b	MET	0.0603593	-	0.298206	spearman	1.04169e-09	0.00701953
161	hsa-miR-129-5p	BECN1	0.0587499	-	0.299365	spearman	1.83945e-05	0.0419905
162	hsa-miR-320a	CRKL	-0.0556235	-	0.317467	spearman	0.625754	1.57621e-08
163	hsa-miR-375	RHOA	-0.0549685	-	0.322458	spearman	0.0410669	0.016347
164	hsa-miR-342-3p	E2F1	-0.0557517	-	0.323972	pearson	0.170092	0.751484
165	hsa-miR-320a	RAC1	0.0547072	-	0.325517	spearman	0.625754	0.000179909
166	hsa-miR-320d	GNAI1	-0.0583328	-	0.325601	spearman	2.61258e-07	0.00695139
167	hsa-miR-320a	USP14	-0.0545069	-	0.327294	spearman	0.625754	7.51859e-18
168	hsa-miR-193a-5p	WT1	0.0529507	-	0.339822	spearman	0.115523	5.79588e-09
169	hsa-miR-320a	PDCD4	-0.0523394	-	0.346924	spearman	0.625754	0.00187486
170	hsa-miR-125a-5p	ARID3A	0.0502322	-	0.371962	spearman	0.591954	0.0105625
171	hsa-miR-125a-5p	MCL1	-0.0477255	-	0.396327	spearman	0.591954	0.000507777
172	hsa-miR-486-5p	SNAI1	-0.0472748	-	0.396365	spearman	0.323512	0.025991
173	hsa-miR-139-5p	JUN	0.0464758	-	0.404404	spearman	0.042844	0.0412854
174	hsa-miR-125a-5p	TRAF6	0.0466	-	0.407571	spearman	0.591954	0.000679177
175	hsa-miR-193a-5p	ERBB2	-0.0456455	-	0.410689	spearman	0.115523	3.2728e-23
176	hsa-miR-133b	AKT1	0.0476992	-	0.411186	spearman	1.04169e-09	0.00331222
177	hsa-miR-574-3p	SMAD4	-0.0443627	-	0.432679	spearman	0.271111	4.80046e-15
178	hsa-miR-486-5p	FOXO1	-0.0424337	-	0.446539	spearman	0.323512	3.40124e-05
179	hsa-miR-139-5p	MET	0.0410465	-	0.461553	spearman	0.042844	0.0223571
180	hsa-miR-193a-5p	PIK3R3	0.0406026	-	0.464344	spearman	0.115523	0.00122478
181	hsa-miR-330-3p	PDCD4	0.0397042	-	0.474294	spearman	0.567572	0.00145634
182	hsa-miR-326	GLI1	0.0394526	-	0.477781	spearman	0.330446	0.000170001
183	hsa-miR-330-3p	CD44	0.0389532	-	0.4827	spearman	0.567572	3.5253e-10
184	hsa-miR-574-3p	RAC1	-0.038946	-	0.49099	spearman	0.271111	0.00011863
185	hsa-miR-125a-5p	MAPK14	-0.0384038	-	0.49499	spearman	0.591954	0.0262587
186	hsa-miR-125a-5p	SMAD4	-0.0382631	-	0.496573	spearman	0.591954	1.375e-14
187	hsa-miR-320a	PTEN	-0.0376812	-	0.49845	spearman	0.625754	9.54445e-22
188	hsa-miR-490-3p	HMGA2	-0.0438806	-	0.51446	spearman	2.39408e-10	5.94378e-06
189	hsa-miR-125a-5p	EGFR	-0.0361646	-	0.520498	spearman	0.591954	0.00010932
190	hsa-miR-320a	CTNNB1	-0.0357182	-	0.521105	pearson	0.625754	0.93705
191	hsa-miR-326	SMO	-0.035236	-	0.52611	spearman	0.330446	0.000111512
192	hsa-miR-490-3p	TGFA	0.0415151	-	0.53741	spearman	2.39408e-10	5.65783e-07
193	hsa-miR-296-5p	HMGA1	-0.0352846	-	0.539966	spearman	2.91661e-09	0.0156478
194	hsa-miR-486-5p	SMAD2	0.0315308	-	0.571733	spearman	0.323512	9.33566e-15
195	hsa-miR-296-5p	CASP8	-0.0324283	-	0.573282	spearman	2.91661e-09	0.0183025
196	hsa-miR-342-3p	ID4	0.0317742	-	0.574227	pearson	0.170092	0.471527
197	hsa-miR-320a	HMGB1	0.0311936	-	0.575261	pearson	0.625754	0.26903
198	hsa-miR-125a-5p	BCL2L12	-0.0313031	-	0.578107	pearson	0.591954	0.25837
199	hsa-miR-125a-5p	RAF1	0.0308255	-	0.583924	spearman	0.591954	1.24617e-10
200	hsa-miR-133b	CDC42	-0.0310377	-	0.592945	spearman	1.04169e-09	0.0108351
201	hsa-miR-125a-5p	HAX1	0.0298015	-	0.596485	spearman	0.591954	4.95018e-06
202	hsa-miR-342-3p	CTBP2	-0.0281516	-	0.618658	pearson	0.170092	0.576343
203	hsa-miR-129-5p	NR4A2	0.0279713	-	0.621467	spearman	1.83945e-05	2.7228e-06
204	hsa-miR-133b	FAS	0.0267386	-	0.645158	spearman	1.04169e-09	0.000327155
205	hsa-miR-28-3p	TP53	0.0257135	-	0.64781	spearman	0.643105	2.20873e-17
206	hsa-miR-125a-5p	TP53	-0.0246814	-	0.661049	spearman	0.591954	2.81063e-17
207	hsa-miR-139-5p	HRAS	-0.0241987	-	0.66432	spearman	0.042844	6.39392e-05
208	hsa-miR-490-3p	RHOA	-0.0290895	-	0.665706	spearman	2.39408e-10	0.297933
209	hsa-miR-375	MALAT1	-0.0239625	-	0.666429	spearman	0.0410669	0.338576
210	hsa-miR-296-5p	CDX1	0.0235857	-	0.682104	spearman	2.91661e-09	7.57455e-23
211	hsa-miR-331-3p	ERBB2	0.0211217	-	0.704426	spearman	0.2609	3.8687e-23
212	hsa-miR-375	LDHB	-0.0184691	-	0.739727	spearman	0.0410669	4.25176e-15
213	hsa-miR-193a-5p	TFAP2A	-0.0177281	-	0.74944	spearman	0.115523	0.00503901
214	hsa-miR-125a-5p	CASP2	-0.0177117	-	0.753046	pearson	0.591954	0.545702
215	hsa-miR-320a	FAS	-0.0172688	-	0.756453	spearman	0.625754	0.000209238
216	hsa-miR-125a-5p	ERBB2	-0.0169017	-	0.763997	spearman	0.591954	7.71688e-21
217	hsa-miR-129-5p	COL1A1	0.015594	-	0.783131	spearman	1.83945e-05	0.179455
218	hsa-miR-125a-5p	BCL2	-0.0150013	-	0.789875	pearson	0.591954	0.531621
219	hsa-miR-320a	MAPK1	0.0145019	-	0.794522	spearman	0.625754	1.36199e-10
220	hsa-miR-296-5p	NGFR	0.0135045	-	0.814597	spearman	2.91661e-09	0.0317536
221	hsa-miR-129-5p	IGF2BP3	-0.0128783	-	0.820188	spearman	1.83945e-05	1.10431e-11
222	hsa-miR-125a-5p	TNFAIP3	-0.012669	-	0.821949	pearson	0.591954	0.794225
223	hsa-miR-125a-5p	DLL4	-0.01262	-	0.822625	spearman	0.591954	0.0015062
224	hsa-miR-320a	FOXM1	0.00920421	-	0.868711	spearman	0.625754	3.11048e-07
225	hsa-miR-125a-5p	MTOR	0.00740413	-	0.895367	spearman	0.591954	1.97919e-06
226	hsa-miR-193a-5p	ING5	0.00720384	-	0.896748	pearson	0.115523	0.190206
227	hsa-miR-320a	MCL1	-0.00711158	-	0.898376	spearman	0.625754	0.000606908
228	hsa-miR-331-3p	FHIT	0.00693366	-	0.900905	spearman	0.2609	1.99202e-09
229	hsa-miR-326	NOTCH1	-0.00657672	-	0.905837	spearman	0.330446	0.0017294
230	hsa-miR-320a	IGF1R	0.00651608	-	0.906845	spearman	0.625754	8.32377e-07
231	hsa-miR-129-5p	TWIST1	0.00660627	-	0.907179	spearman	1.83945e-05	0.720364
232	hsa-miR-342-3p	DNMT1	-0.00563366	-	0.920669	spearman	0.170092	9.65402e-06
233	hsa-miR-296-5p	PIN1	0.00513344	-	0.928974	spearman	2.91661e-09	5.67436e-07
234	hsa-miR-490-3p	ABCC2	-0.00268691	-	0.968174	spearman	2.39408e-10	0.000400274
235	hsa-miR-125a-5p	PIK3CG	0.00168747	-	0.976088	spearman	0.591954	0.00176541
236	hsa-miR-296-5p	S100B	-0.000682028	-	0.990551	spearman	2.91661e-09	0.153414
