# Supplementary material for: Identification of colorectal cancer associated biomarkers: an integrated analysis of miRNA expression
Source: Aging (Albany NY). 2021 Sep 21;13(18):21991–2029. doi: 10.18632/aging.203556 (PMC8507258; doi:10.18632/aging.203556)
Supplement: Supplementary Table 5 [file aging-13-203556-s006.xlsx]

## Sheet: Supplementary Table V
Supplementary Table 5. MiRNA functional enrichment for the 25 downregulated miRNAs, performed using the Kyoto Encyclopedia of Genes and Genomes (KEEG) available at The Database for Annotation, Visualization and Integrated Discovery (DAVID) Bioinformatics Resources.
Term	p-value	FDR
hsa05200:Pathways in cancer	6.44e-49	7.98e-46
hsa05205:Proteoglycans in cancer	2.99e-31	3.7e-28
hsa05215:Prostate cancer	1.53e-28	1.9e-25
hsa05212:Pancreatic cancer	3.24e-28	4.01e-25
hsa05220:Chronic myeloid leukemia	2.6e-25	3.22e-22
hsa05218:Melanoma	5.4e-24	6.68e-21
hsa05161:Hepatitis B	6.84e-23	8.47e-20
hsa05206:MicroRNAs in cancer	9.32e-23	1.15e-19
hsa04068:FoxO signaling pathway	9.99e-23	1.24e-19
hsa05210:Colorectal cancer	1.37e-22	1.7e-19
hsa05214:Glioma	4.6e-22	5.7e-19
hsa04151:PI3K-Akt signaling pathway	1.23e-21	1.53e-18
hsa05230:Central carbon metabolism in cancer	9.08e-21	1.12e-17
hsa05223:Non-small cell lung cancer	1.13e-20	1.4e-17
hsa04550:Signaling pathways regulating pluripotency of stem cells	1.22e-18	1.51e-15
hsa05213:Endometrial cancer	2.08e-18	2.57e-15
hsa04066:HIF-1 signaling pathway	5.93e-18	7.35e-15
hsa05219:Bladder cancer	1.87e-17	2.31e-14
hsa04510:Focal adhesion	2.67e-17	3.3e-14
hsa05211:Renal cell carcinoma	2.6e-16	2.78e-13
hsa04722:Neurotrophin signaling pathway	1.04e-15	1.23e-12
hsa04012:ErbB signaling pathway	3.51e-15	4.4e-12
hsa04919:Thyroid hormone signaling pathway	5.13e-15	6.33e-12
hsa05166:HTLV-I infection	8.98e-15	1.11e-11
hsa05222:Small cell lung cancer	3.49e-14	4.32e-11
hsa04015:Rap1 signaling pathway	3.8e-14	4.7e-11
hsa05221:Acute myeloid leukemia	1.28e-13	1.59e-10
hsa04520:Adherens junction	3.58e-13	4.44e-10
hsa04660:T cell receptor signaling pathway	6.89e-13	8.53e-10
hsa05142:Chagas disease (American trypanosomiasis)	1.39e-12	1.73e-09
hsa05203:Viral carcinogenesis	1.43e-12	1.77e-09
hsa04917:Prolactin signaling pathway	5.59e-12	6.93e-09
hsa04071:Sphingolipid signaling pathway	1.74e-11	2.16e-08
hsa04014:Ras signaling pathway	8.14e-11	1.01e-07
hsa04370:VEGF signaling pathway	1.39e-10	1.72e-07
hsa05169:Epstein-Barr virus infection	2.2e-10	2.73e-07
hsa05160:Hepatitis C	8.77e-10	1.09e-06
hsa05162:Measles	8.77e-10	1.09e-06
hsa05231:Choline metabolism in cancer	1.09e-09	1.35e-06
hsa04620:Toll-like receptor signaling pathway	2.19e-09	2.71e-06
hsa04668:TNF signaling pathway	2.5e-09	3.09e-06
hsa05216:Thyroid cancer	2.89e-09	3.58e-06
hsa04062:Chemokine signaling pathway	3.98e-09	4.92e-06
hsa05202:Transcriptional misregulation in cancer	4.47e-09	5.54e-06
hsa04380:Osteoclast differentiation	5.59e-09	6.93e-06
hsa04662:B cell receptor signaling pathway	8.72e-09	1.08e-05
hsa04150:mTOR signaling pathway	1.45e-08	1.79e-05
hsa04010:MAPK signaling pathway	2.39e-08	2.96e-05
hsa05145:Toxoplasmosis	3.13e-08	3.88e-05
hsa04390:Hippo signaling pathway	4.4e-08	5.46e-05
hsa04915:Estrogen signaling pathway	6.85e-08	8.49e-05
hsa04664:Fc epsilon RI signaling pathway	8.2e-08	0.000102
hsa04310:Wnt signaling pathway	8.51e-08	0.000105
hsa04914:Progesterone-mediated oocyte maturation	1.29e-07	0.00016
hsa04210:Apoptosis	3.37e-07	0.000417
hsa04024:cAMP signaling pathway	3.61e-07	0.000448
hsa04910:Insulin signaling pathway	5.57e-07	0.000689
hsa04115:p53 signaling pathway	7.13e-07	0.000883
hsa04350:TGF-beta signaling pathway	7.56e-07	0.000936
hsa04960:Aldosterone-regulated sodium reabsorption	7.8e-07	0.000965
hsa04810:Regulation of actin cytoskeleton	8.35e-07	0.00103437
hsa04152:AMPK signaling pathway	9.02e-07	0.00111726
hsa04110:Cell cycle	9.91e-07	0.00122693
hsa04932:Non-alcoholic fatty liver disease (NAFLD)	1.67e-06	0.00206818
hsa04670:Leukocyte transendothelial migration	2.78e-06	0.00344016
hsa05100:Bacterial invasion of epithelial cells	3e-06	0.003714
hsa04930:Type II diabetes mellitus	4.11e-06	0.0050858
hsa05131:Shigellosis	4.38e-06	0.00542092
hsa04630:Jak-STAT signaling pathway	5.83e-06	0.00721437
hsa04666:Fc gamma R-mediated phagocytosis	5.94e-06	0.0073566
hsa05164:Influenza A	8.92e-06	0.0110473
hsa04611:Platelet activation	1e-05	0.0124373
hsa05217:Basal cell carcinoma	1.02e-05	0.0126712
hsa05140:Leishmaniasis	1.05e-05	0.0130151
hsa04725:Cholinergic synapse	1.21e-05	0.0150354
hsa05132:Salmonella infection	3.78e-05	0.0468502
hsa05152:Tuberculosis	4.99e-05	0.0617384
hsa04931:Insulin resistance	5.53e-05	0.0685216
hsa05133:Pertussis	0.000116	0.14411
hsa04650:Natural killer cell mediated cytotoxicity	0.000155	0.192056
hsa04916:Melanogenesis	0.000164	0.203104
hsa04320:Dorso-ventral axis formation	0.000171	0.211527
hsa04921:Oxytocin signaling pathway	0.000196	0.242705
hsa04360:Axon guidance	0.000216	0.267561
hsa04621:NOD-like receptor signaling pathway	0.000833	1.02623
hsa04730:Long-term depression	0.00120232	1.47891
hsa04973:Carbohydrate digestion and absorption	0.00141539	1.73889
hsa05120:Epithelial cell signaling in Helicobacter pylori infection	0.00213747	2.61527
hsa04912:GnRH signaling pathway	0.00223611	2.73442
hsa04330:Notch signaling pathway	0.0025881	3.15854
hsa04920:Adipocytokine signaling pathway	0.00267408	3.26188
hsa04923:Regulation of lipolysis in adipocytes	0.0050815	6.11451
hsa05146:Amoebiasis	0.00525406	6.31598
hsa04144:Endocytosis	0.00886828	10.4455
hsa05321:Inflammatory bowel disease (IBD)	0.00893125	10.5159
hsa05168:Herpes simplex infection	0.0110667	12.8749
hsa04622:RIG-I-like receptor signaling pathway	0.0128912	14.8448
hsa05014:Amyotrophic lateral sclerosis (ALS)	0.0175067	19.6469
hsa05130:Pathogenic Escherichia coli infection	0.0187086	20.8558
hsa04540:Gap junction	0.0314234	32.6604
hsa04720:Long-term potentiation	0.0429609	41.9482
hsa04750:Inflammatory mediator regulation of TRP channels	0.046586	44.6135
hsa04922:Glucagon signaling pathway	0.0483049	45.8376
